# Supplementary material for: Visible light-mediated difluoroalkylation of electron-deficient alkenes
Source: PubMed Central journal article supplement (PMC6036985; doi:10.3762/bjoc.14.139), 2018-07-02

# Supporting Information

for

## Visible light-mediated difluoroalkylation of electron-deficient alkenes

Vyacheslav I. Supranovich<sup>1</sup>, Vitalij V. Levin<sup>1</sup>, Marina I. Struchkova<sup>1</sup>, Jinbo Hu<sup>2</sup> and Alexander D. Dilman\*<sup>1</sup>

Address: <sup>1</sup>N. D. Zelinsky Institute of Organic Chemistry, 119991 Moscow, Leninsky prosp. 47, Russian Federation and <sup>2</sup>Key Laboratory of Organofluorine Chemistry, Center for Excellence in Molecular Synthesis, Shanghai Institute of Organic Chemistry, University of Chinese Academy of Sciences, Chinese Academy of Sciences, 345 Ling-Ling Road, Shanghai 200032, China

Email: Alexander D. Dilman - [adil25@mail.ru](mailto:adil25@mail.ru)

\*Corresponding author

### Full experimental details, compound characterization, and copies of NMR spectra

| Content                            |         |
|------------------------------------|---------|
|                                    | Page    |
| General Methods                    | S2      |
| Synthesis of compounds <b>3a–u</b> | S2      |
| Compounds <b>3a–u</b>              | S2–S9   |
| NMR spectra                        | S10–S74 |

**General methods:** Column chromatography was carried out employing silica gel (230–400 mesh). Precoated silica gel plates F-254 were used for thin-layer analytical chromatography visualizing with UV and/or acidic aq KMnO<sub>4</sub> solution. High resolution mass spectra (HRMS) were measured using electrospray ionization (ESI) and time-of-flight (TOF) mass analyzer. The measurements were done in a positive ion mode (interface capillary voltage –4500 V) or in a negative ion mode (3200 V); mass range from *m/z* 50 to *m/z* 3000. For irradiation, a strip of light emitting diodes (2835-120LED 1M-Blue, 12V) was used.

**Reagents.** The following starting compounds were prepared according to literature procedures: (2,2-difluoro-2-iodoethyl)benzene (**1a**),<sup>1</sup> 1-bromo-2-(2,2-difluoro-2-iodoethyl)benzene,<sup>1</sup> 4-(4,4,5,5-tetramethyl-1,3,2-dioxaborolan-2-yl)-2-(2,2-difluoro-2-iodoethyl)benzene,<sup>1</sup> (2,2-difluoro-2-iodo-1-methylethyl)benzene,<sup>1</sup> 4,4-difluoro-4-iodobutyl benzoate,<sup>1</sup> 2,2-difluoro-2-iodo-1-phenylethanol,<sup>2</sup> 2,2-difluoro-2-iodo-1-(4-methoxyphenyl)ethanol,<sup>2</sup> methyl 4-(2,2-difluoro-1-hydroxy-2-iodoethyl)benzoate.<sup>1</sup>

#### Difluoroalkylation of alkenes (General procedure).

The tube containing a stirring bar and sodium cyanoborohydride (63 mg, 1.0 mmol) was evacuated and filled with argon. Then, methanol (1.0 mL), iodide **1** (0.50 mmol), alkene **2** [for **3a–s**, 0.60 mmol; for **3t,u**, 1.00 mmol], and pyridine (59 mg, 0.75 mmol) were added successively. The tube was tightly closed with a screw cap and the reaction mixture was irradiated by a strip of blue LED with cooling maintaining the reaction temperature around 23–25 °C. For the work-up, the reaction mixture was poured into brine (NaCl, 5 mL) and water (5 mL) mixture, and the product was extracted with ethyl acetate (3 × 4 mL). The combined organic phases were dried with Na<sub>2</sub>SO<sub>4</sub> and concentrated under vacuum, and the residue was purified by column chromatography.

#### *tert*-Butyl 4,4-difluoro-5-phenylpentanoate (**3a**).

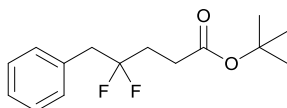

Yield 112 mg (83%). Colorless oil. Chromatography: hexanes/EtOAc, 10/1. *R<sub>f</sub>* 0.29 (hexanes/EtOAc, 10/1).

<sup>1</sup>H NMR (300 MHz, CDCl<sub>3</sub>) δ: 7.38–7.27 (m, 5H), 3.17 (t, *J* = 16.0 Hz, 2H), 2.47 (t, *J* = 7.9 Hz, 2H), 2.00–2.03 (m, 2H), 1.46 (s, 9H).

<sup>13</sup>C{<sup>1</sup>H} NMR (75.5 MHz, CDCl<sub>3</sub>) δ: 171.7, 133.2 (t, *J* = 4.8 Hz), 130.4, 128.6, 127.5, 123.5 (t, *J* = 242.6 Hz), 80.8, 43.5 (t, *J* = 25.9 Hz), 31.3 (t, *J* = 25.2 Hz), 28.3 (t, *J* = 4.5 Hz), 28.1.

<sup>19</sup>F NMR (282 MHz, CDCl<sub>3</sub>) δ: –99.1 (quint, *J* = 16.0 Hz).

HRMS (ESI): calcd for C<sub>15</sub>H<sub>21</sub>F<sub>2</sub>O<sub>2</sub> (M+H) 271.1504; found 271.1500.

<sup>1</sup> Levin, V. V.; Zemtsov, A. A.; Struchkova, M. I.; Dilman, A. D. *Org. Lett.* **2013**, *15*, 917–919.

<sup>2</sup> Levin, V. V.; Smirnov, V. O.; Struchkova, M. I.; Dilman, A. D. *J. Org. Chem.* **2015**, *80*, 9349–9353.

**tert-Butyl 5-(4-bromophenyl)-4,4-difluoropentanoate (3b).**

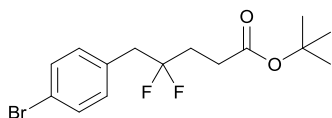

Yield 138 mg (79%). Colorless oil. Chromatography: hexanes/EtOAc, 10/1.  $R_f$  0.36 (hexanes/EtOAc, 10/1).

$^1\text{H}$  NMR (300 MHz,  $\text{CDCl}_3$ )  $\delta$ : 7.44 (d,  $J = 8.3$  Hz, 2H), 7.13 (d,  $J = 8.3$  Hz, 2H), 3.09 (t,  $J = 16.0$  Hz, 2H), 2.43 (t,  $J = 7.8$  Hz, 2H), 2.16–1.99 (m, 2H), 1.43 (s, 9H).

$^{13}\text{C}\{^1\text{H}\}$  NMR (75.5 MHz,  $\text{CDCl}_3$ )  $\delta$ : 171.5, 132.1, 131.7, 123.1 (t,  $J = 242.9$  Hz), 121.6, 80.0, 42.8 (t,  $J = 26.2$  Hz), 31.3 (t,  $J = 25.1$  Hz), 28.2 (t,  $J = 4.4$  Hz), 28.1.

$^{19}\text{F}$  NMR (282 MHz,  $\text{CDCl}_3$ )  $\delta$ : -99.4 (quint,  $J = 16.0$  Hz).

HRMS (ESI): calcd for  $\text{C}_{15}\text{H}_{19}\text{BrF}_2\text{O}_2\text{Na}$  ( $\text{M}+\text{Na}$ ) 371.0429, 373.0409; found 371.0420, 373.0404.

**tert-Butyl 5-(2-bromophenyl)-4,4-difluoropentanoate (3c).**

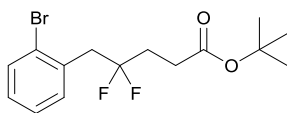

Yield 142 mg (81%). Colorless oil. Chromatography: hexanes/EtOAc, 10/1.  $R_f$  0.39 (hexanes/EtOAc, 10/1).

$^1\text{H}$  NMR (300 MHz,  $\text{CDCl}_3$ )  $\delta$ : 7.75 (dd,  $J = 8.0, 1.2$  Hz, 1H), 7.37 (d,  $J = 7.8$  Hz, 1H), 7.27 (td,  $J = 7.5, 1.3$  Hz, 1H), 7.13 (td,  $J = 7.7, 1.8$  Hz, 1H), 3.40 (t,  $J = 16.0$  Hz, 2H), 2.47 (t,  $J = 7.8$  Hz, 2H), 2.27–2.10 (m, 2H), 1.44 (s, 9H).

$^{13}\text{C}\{^1\text{H}\}$  NMR (75.5 MHz,  $\text{CDCl}_3$ )  $\delta$ : 171.6, 133.1, 133.0 (t,  $J = 4.2$  Hz), 132.4 (t,  $J = 1.3$  Hz), 129.1, 127.5, 125.8, 123.4 (t,  $J = 243.6$  Hz), 80.7, 42.4 (t,  $J = 26.2$  Hz), 31.5 (t,  $J = 24.9$  Hz), 28.3 (t,  $J = 4.5$  Hz), 28.1.

$^{19}\text{F}$  NMR (282 MHz,  $\text{CDCl}_3$ )  $\delta$ : -98.7 (quint,  $J = 16.0$  Hz).

HRMS (ESI): calcd for  $\text{C}_{15}\text{H}_{19}\text{BrF}_2\text{O}_2\text{Na}$  ( $\text{M}+\text{Na}$ ) 371.0429, 373.0409; found 371.0418, 373.0400.

**tert-Butyl 4,4-difluoro-5-[4-(4,4,5,5-tetramethyl-1,3,2-dioxaborolan-2-yl)phenyl]pentanoate (3d).**

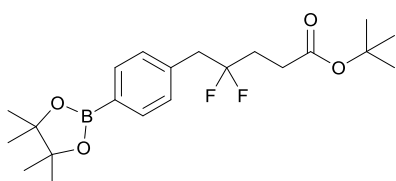

Yield 141 mg (71%). Colorless crystals. Mp 51–53 °C. Chromatography: hexanes/EtOAc, from 8/1 to 5/1.  $R_f$  0.44 (hexanes/EtOAc, 5/1).

$^1\text{H}$  NMR (300 MHz,  $\text{CDCl}_3$ )  $\delta$ : 7.79 (d,  $J = 7.6$  Hz, 2H), 7.28 (d,  $J = 7.6$  Hz, 2H), 3.22 (t,  $J = 15.9$  Hz, 2H), 2.43 (t,  $J = 7.8$  Hz, 2H), 2.16–1.99 (m, 2H), 1.43 (s, 9H), 1.35 (s, 12H).

$^{13}\text{C}\{^1\text{H}\}$  NMR (75.5 MHz,  $\text{CDCl}_3$ )  $\delta$ : 171.7, 136.3 (t,  $J = 4.7$  Hz), 135.1, 129.8, 123.5 (t,  $J = 243.2$  Hz), 83.9, 80.8, 43.7 (t,  $J = 25.9$  Hz), 31.3 (t,  $J = 25.1$  Hz), 28.3 (t,  $J = 4.5$  Hz), 28.1, 25.0.

$^{19}\text{F}$  NMR (282 MHz,  $\text{CDCl}_3$ )  $\delta$ : -98.7 (quint,  $J = 16.5$  Hz).

HRMS (ESI): calcd for  $\text{C}_{21}\text{H}_{31}\text{BF}_2\text{O}_4\text{Na}$  ( $\text{M}+\text{Na}$ ) 419.2179; found 419.2171.

**tert-Butyl 4,4-difluoro-5-phenylhexanoate (3e).**

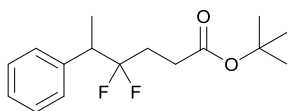

Yield 107 mg (75%). Colorless oil. Chromatography: hexanes/EtOAc, 10/1.  $R_f$  0.42 (hexanes/EtOAc, 10/1).

$^1\text{H}$  NMR (300 MHz,  $\text{CDCl}_3$ )  $\delta$ : 7.38–7.29 (m, 5H), 3.24–3.12 (m, 1H), 2.46–2.40 (m, 2H), 2.11–1.94 (m, 2H), 1.47–1.43 (m, 12H).

$^{13}\text{C}\{^1\text{H}\}$  NMR (75.5 MHz,  $\text{CDCl}_3$ )  $\delta$ : 171.9, 139.6 (dd,  $J = 6.1, 1.3$  Hz), 128.7 (t,  $J = 1.2$  Hz), 128.6, 127.5, 124.7 (dd,  $J = 246.7, 245.1$  Hz), 80.6, 46.8 (dd,  $J = 24.7, 23.8$  Hz), 30.4 (t,  $J = 25.2$  Hz), 28.1, 28.1 (t,  $J = 4.7$  Hz), 14.8 (t,  $J = 5.0$  Hz).

$^{19}\text{F}$  NMR (282 MHz,  $\text{CDCl}_3$ )  $\delta$ : -104.2 (dm,  $J = 241.3$  Hz, 1F), -109.3 (dm,  $J = 241.3$  Hz, 1F).

HRMS (ESI): calcd for  $\text{C}_{16}\text{H}_{23}\text{F}_2\text{O}_2$  (M+H) 285.1661; found 285.1653.

**7-(tert-Butoxy)-4,4-difluoro-7-oxoheptyl benzoate (3f).**

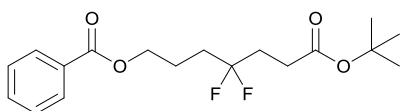

Yield 128 mg (75%). Colorless oil. Chromatography: hexanes/EtOAc, 8/1.  $R_f$  0.25 (hexanes/EtOAc, 8/1).

$^1\text{H}$  NMR (300 MHz,  $\text{CDCl}_3$ )  $\delta$ : 8.02 (d,  $J = 7.1$  Hz, 2H), 7.54 (t,  $J = 7.4$  Hz, 1H), 7.42 (dd,  $J = 7.4, 7.1$  Hz, 2H), 4.34 (t,  $J = 6.0$  Hz, 2H), 2.43 (t,  $J = 7.8$  Hz, 2H), 2.24–1.94 (m, 6H), 1.43 (s, 9H).

$^{13}\text{C}\{^1\text{H}\}$  NMR (75.5 MHz,  $\text{CDCl}_3$ )  $\delta$ : 171.6, 166.5, 133.0, 130.2, 129.6, 128.4, 124.0 (t,  $J = 241.0$  Hz), 80.8, 64.1, 33.5 (t,  $J = 25.7$  Hz), 31.9 (t,  $J = 25.7$  Hz), 28.4 (t,  $J = 4.6$  Hz), 28.1, 21.9 (t,  $J = 4.6$  Hz).

$^{19}\text{F}$  NMR (282 MHz,  $\text{CDCl}_3$ )  $\delta$ : -101.1 (quint,  $J = 16.5$  Hz).

HRMS (ESI): calcd for  $\text{C}_{18}\text{H}_{24}\text{F}_2\text{O}_4\text{Na}$  (M+Na) 365.1535; found 365.1536.

**4,4-Difluoro-N,N-diisopropyl-5-phenylpentanamide (3g).**

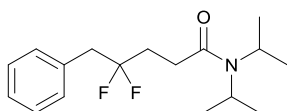

Yield 105 mg (71%). Colorless oil. Chromatography: hexanes/EtOAc, 5/1.  $R_f$  0.26 (hexanes/EtOAc, 5/1).

$^1\text{H}$  NMR (300 MHz,  $\text{CDCl}_3$ )  $\delta$ : 7.35–7.24 (m, 5H), 3.94 (sept,  $J = 6.7$  Hz, 1H), 3.47 (br. s, 1H), 3.17 (t,  $J = 15.9$  Hz, 2H), 2.51–2.46 (m, 2H), 2.25–2.07 (m, 2H), 1.35 (d,  $J = 6.8$  Hz, 6H), 1.17 (d,  $J = 6.7$  Hz, 6H).

$^{13}\text{C}\{^1\text{H}\}$  NMR (75.5 MHz,  $\text{CDCl}_3$ )  $\delta$ : 169.9, 133.3 (t,  $J = 5.0$  Hz), 130.4, 128.5, 127.3, 124.1 (t,  $J = 242.6$  Hz), 48.3, 45.7, 43.8 (t,  $J = 26.1$  Hz), 31.5 (t,  $J = 24.1$  Hz), 27.2 (t,  $J = 3.6$  Hz), 20.8, 20.7.

$^{19}\text{F}$  NMR (282 MHz,  $\text{CDCl}_3$ )  $\delta$ : -99.0 (quint,  $J = 15.9$  Hz).

HRMS (ESI): calcd for  $\text{C}_{17}\text{H}_{26}\text{F}_2\text{NO}$  (M+H) 298.1977; found 298.1979.

#### 4,4-Difluoro-*N,N*-diisopropyl-5-phenylhexanamide (3h).

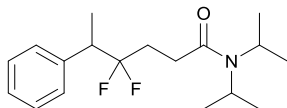

Yield 109 mg (70%). Colorless oil. Chromatography: hexanes/EtOAc, 5/1.  $R_f$  0.27 (hexanes/EtOAc, 5/1).

$^1\text{H}$  NMR (300 MHz,  $\text{CDCl}_3$ )  $\delta$ : 7.36–7.22 (m, 5H), 3.92 (sept,  $J = 6.7$  Hz, 1H), 3.45 (br. s, 1H), 3.27–3.10 (m, 1H), 2.19–1.95 (m, 2H), 1.44 (d,  $J = 7.2$  Hz, 3H), 1.34 (d,  $J = 6.7$  Hz, 6H), 1.15 (d,  $J = 6.7$  Hz, 6H).

$^{13}\text{C}\{^1\text{H}\}$  NMR (75.5 MHz,  $\text{CDCl}_3$ )  $\delta$ : 170.1, 139.6 (dd,  $J = 5.7, 1.7$  Hz), 128.8 (t,  $J = 1.2$  Hz), 128.5, 127.4, 125.3 (dd,  $J = 246.6, 245.0$  Hz), 48.1, 47.0 (t,  $J = 24.5$  Hz), 45.7, 30.5 (t,  $J = 24.2$  Hz), 27.2 (t,  $J = 3.6$  Hz), 20.8, 20.7, 14.8 (t,  $J = 5.0$  Hz).

$^{19}\text{F}$  NMR (282 MHz,  $\text{CDCl}_3$ )  $\delta$ : -103.6 (ddt,  $J = 239.4, 28.2, 9.5$  Hz), -108.9 (dddd,  $J = 239.4, 27.8, 18.9, 8.4$  Hz).

HRMS (ESI): calcd for  $\text{C}_{18}\text{H}_{28}\text{F}_2\text{NO}$ (M+H) 312.2133; found 312.2140.

#### 4,4-Difluoro-5-hydroxy-*N,N*-diisopropyl-5-phenylpentanamide (3i).

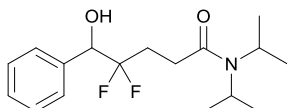

Yield 114 mg (73%). Colorless crystals. Mp 80-82°C (hexanes). Chromatography: hexanes/EtOAc, from 3/1 to 1/1.  $R_f$  0.26 (hexanes/EtOAc, 3/1).

$^1\text{H}$  NMR (300 MHz,  $\text{CDCl}_3$ )  $\delta$ : 7.49–7.30 (m, 5H), 4.73 (ddd,  $J = 13.1, 8.5, 4.2$  Hz, 1H), 4.47 (d,  $J = 4.3$  Hz, 1H), 3.95 (sept,  $J = 6.8$  Hz, 1H), 3.49 (br. s, 1H), 2.60–2.39 (m, 3H), 2.19–2.00 (m, 1H), 1.34 (d,  $J = 6.8$  Hz, 6H), 1.20 (d,  $J = 6.8$  Hz, 3H), 1.19 (d,  $J = 6.8$  Hz, 3H).

$^{13}\text{C}\{^1\text{H}\}$  NMR (75.5 MHz,  $\text{CDCl}_3$ )  $\delta$ : 170.7, 136.8 (t,  $J = 1.8$  Hz), 128.4, 128.2, 127.8 (t,  $J = 1.3$  Hz), 123.6 (dd,  $J = 248.2, 246.1$  Hz), 74.5 (dd,  $J = 29.2, 28.0$  Hz), 48.4, 46.0, 28.0 (t,  $J = 24.2$  Hz), 27.2 (dd,  $J = 5.5, 3.4$  Hz), 20.9, 20.8, 20.7, 20.6.

$^{19}\text{F}$  NMR (282 MHz,  $\text{CDCl}_3$ )  $\delta$ : -109.0 (dm,  $J = 248.7$  Hz), -110.4 (dm,  $J = 248.7$  Hz).

HRMS (ESI): calcd for  $\text{C}_{17}\text{H}_{26}\text{F}_2\text{NO}_2$  (M+H) 314.1926; found 314.1938.

#### 4,4-Difluoro-5-hydroxy-*N,N*-diisopropyl-5-(4-methoxyphenyl)pentanamide (3j).

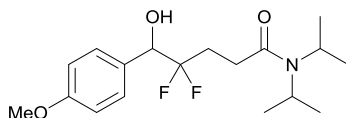

Yield 137 mg (80%). Colorless oil. Chromatography: hexanes/EtOAc, 2/1.  $R_f$  0.26 (hexanes/EtOAc, 2/1).

$^1\text{H}$  NMR (300 MHz,  $\text{CDCl}_3$ )  $\delta$ : 7.36 (d,  $J = 8.5$  Hz, 2H), 6.86 (d,  $J = 8.5$  Hz, 2H), 4.67 (ddd,  $J = 13.9, 9.0, 3.9$  Hz, 1H), 4.36 (d,  $J = 4.1$  Hz, 1H), 3.94 (sept,  $J = 6.6$  Hz, 1H), 3.77 (s, 3H), 3.47 (br. s,  $J = 3.47$  Hz, 1H), 2.56–2.02 (m, 4H), 1.32 (d,  $J = 6.7$  Hz, 6H), 1.17 (d,  $J = 6.5$  Hz, 3H), 1.16 (d,  $J = 6.5$  Hz, 3H).

$^{13}\text{C}\{^1\text{H}\}$  NMR (75.5 MHz,  $\text{CDCl}_3$ )  $\delta$ : 170.6, 159.7, 129.0, 123.7 (t,  $J = 246.8$  Hz), 113.6, 74.2 (t,  $J = 28.5$  Hz), 55.3, 48.4, 46.0, 28.0 (t,  $J = 24.2$  Hz), 27.2 (t,  $J = 3.8$  Hz), 20.84, 20.82, 20.63, 20.60.

$^{19}\text{F}$  NMR (282 MHz,  $\text{CDCl}_3$ )  $\delta$ :  $-109.5$  (dm,  $J = 246.1$  Hz, 1F),  $-110.6$  (dm,  $J = 246.1$  Hz, 1F).

HRMS (ESI): calcd for  $\text{C}_{18}\text{H}_{28}\text{F}_2\text{NO}_3$  (M+H) 344.2032; found 344.2035.

#### 4,4-Difluoro-5-phenylpentanenitrile (3k).

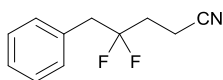

Yield 83 mg (85%). Colorless oil. Chromatography: hexanes/EtOAc, from 5/1 to 3/1.  $R_f$  0.24 (hexanes/EtOAc, 5/1).

$^1\text{H}$  NMR (300 MHz,  $\text{CDCl}_3$ )  $\delta$ : 7.41–7.25 (m, 5H), 3.21 (t,  $J = 16.0$  Hz, 2H), 2.53 (t,  $J = 7.7$  Hz, 2H), 2.15 (tt,  $J = 16.0, 7.7$  Hz, 2H).

$^{13}\text{C}\{^1\text{H}\}$  NMR (75.5 MHz,  $\text{CDCl}_3$ )  $\delta$ : 132.3 (t,  $J = 4.9$  Hz), 130.2, 128.7, 127.7, 122.3 (t,  $J = 243.9$  Hz), 118.5, 43.1 (t,  $J = 25.4$  Hz), 31.7 (t,  $J = 25.5$  Hz), 10.3 (t,  $J = 5.9$  Hz).

$^{19}\text{F}$  NMR (282 MHz,  $\text{CDCl}_3$ )  $\delta$ :  $-100.0$  (quint,  $J = 16.0$  Hz).

HRMS (ESI): calcd for  $\text{C}_{11}\text{H}_{11}\text{F}_2\text{NNa}$  (M+Na) 218.0752; found 218.0760.

#### 4,4-Difluoro-5-phenylhexanenitrile (3l).

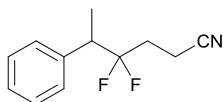

Yield 90 mg (86%). Colorless oil. Chromatography: hexanes/EtOAc, 3/1.  $R_f$  0.43 (hexanes/EtOAc, 3/1).

$^1\text{H}$  NMR (300 MHz,  $\text{CDCl}_3$ )  $\delta$ : 7.41–7.26 (m, 5H), 3.28–3.10 (m, 1H), 2.50 (ddd,  $J = 10.5, 5.3, 2.5$  Hz, 2H), 2.17–1.94 (m, 2H), 1.48 (d,  $J = 7.2$  Hz, 3H).

$^{13}\text{C}\{^1\text{H}\}$  NMR (75.5 MHz,  $\text{CDCl}_3$ )  $\delta$ : 138.7 (dd,  $J = 6.5, 1.1$  Hz), 128.8, 128.5, 127.9, 123.5 (dd,  $J = 247.7, 246.2$  Hz), 118.7, 46.6 (dd,  $J = 24.2, 23.2$  Hz), 31.2 (t,  $J = 25.7$  Hz), 14.4 (t,  $J = 4.8$  Hz), 10.3 (t,  $J = 6.2$  Hz).

$^{19}\text{F}$  NMR (282 MHz,  $\text{CDCl}_3$ )  $\delta$ :  $-104.5$  (ddt,  $J = 242.8, 25.9, 8.7$  Hz, 1F),  $-111.2$  (dddd,  $J = 242.8, 27.0, 20.8, 7.2$  Hz, 1F).

HRMS (ESI): calcd for  $\text{C}_{12}\text{H}_{13}\text{F}_2\text{NNa}$  (M+Na) 232.0908; found 232.0909.

#### 4,4-Difluoro-5-hydroxy-5-phenylpentanenitrile (3m).<sup>3</sup>

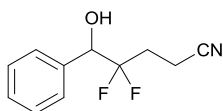

Yield 82 mg (78%). Colorless oil. Chromatography: hexanes/EtOAc, 1/1.  $R_f$  0.36 (hexanes/EtOAc, 1/1).

$^1\text{H}$  NMR (300 MHz,  $\text{CDCl}_3$ )  $\delta$ : 7.44–7.35 (m, 5H), 4.86 (td,  $J = 9.9, 3.8$  Hz, 1H), 3.12 (d,  $J = 4.1$  Hz, 1H), 2.50 (dd,  $J = 7.2, 3.3$  Hz, 1H), 2.47 (dd,  $J = 6.7, 2.2$  Hz, 1H), 2.42–1.95 (m, 2H).

$^{13}\text{C}\{^1\text{H}\}$  NMR (75.5 MHz,  $\text{CDCl}_3$ )  $\delta$ : 136.0 (dd,  $J = 4.0, 1.0$  Hz), 129.0, 128.5, 127.3, 121.9 (d,  $J = 248.3$  Hz), 118.8, 74.8 (t,  $J = 28.4$  Hz), 28.1 (t,  $J = 24.4$  Hz), 10.1 (t,  $J = 6.0$  Hz).

<sup>3</sup> Panferova, L. I.; Tsymbal, A. V.; Levin, V. V.; Struchkova, M. I.; Dilman, A. D. *Org. Lett.* **2016**, *18*, 996–999.

$^{19}\text{F}$  NMR (282 MHz,  $\text{CDCl}_3$ )  $\delta$ : -110.2 (ddt,  $J = 249.3, 25.7, 9.0$  Hz, 1F), -111.7 (ddt,  $J = 249.7, 25.9, 9.1$  Hz, 1F).

HRMS (ESI): calcd for  $\text{C}_{11}\text{H}_{11}\text{F}_2\text{NONa}$  ( $\text{M}+\text{Na}$ ) 234.0701; found 234.0707.

### 5-(4-Bromophenyl)-4,4-difluoropentanenitrile (3n).

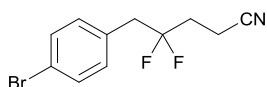

Yield 106 mg (77%). Colorless crystals. Mp 79-80°C. Chromatography: hexanes/EtOAc, 3/1.  $R_f$  0.36 (hexanes/EtOAc, 3/1).

$^1\text{H}$  NMR (300 MHz,  $\text{CDCl}_3$ )  $\delta$ : 7.47 (d,  $J = 8.3$  Hz, 2H), 7.13 (d,  $J = 8.3$  Hz, 2H), 3.14 (t,  $J = 16.0$  Hz, 2H), 2.53 (t,  $J = 7.6$  Hz, 2H), 2.21-2.05 (m, 2H).

$^{13}\text{C}\{^1\text{H}\}$  NMR (75.5 MHz,  $\text{CDCl}_3$ )  $\delta$ : 132.0, 131.9, 131.2 (t,  $J = 4.8$  Hz), 122.0, 121.9 (t,  $J = 244.4$  Hz), 118.4, 42.6 (t,  $J = 25.6$  Hz), 31.9 (t,  $J = 25.4$  Hz), 10.4 (t,  $J = 5.9$  Hz).

$^{19}\text{F}$  NMR (282 MHz,  $\text{CDCl}_3$ )  $\delta$ : -100.4 (quint,  $J = 16.0$  Hz).

HRMS (ESI): calcd for  $\text{C}_{11}\text{H}_{10}\text{BrF}_2\text{NNa}$  ( $\text{M}+\text{Na}$ ) 295.9857, 297.9837; found 295.9853, 297.9835.

### 5-(2-Bromophenyl)-4,4-difluoropentanenitrile (3o).

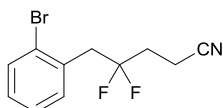

Yield 112 mg (82%). Colorless oil. Chromatography: hexanes/EtOAc, 3/1.  $R_f$  0.37 (hexanes/EtOAc, 3/1).

$^1\text{H}$  NMR (300 MHz,  $\text{CDCl}_3$ )  $\delta$ : 7.60 (dd,  $J = 7.8, 1.5$  Hz, 1H), 7.36 (d,  $J = 7.8$  Hz, 1H), 7.30 (td,  $J = 7.8, 1.5$  Hz, 1H), 7.18 (td,  $J = 7.8, 1.5$  Hz, 1H), 3.45 (t,  $J = 15.7$  Hz, 2H), 2.55 (t,  $J = 7.7$  Hz, 2H), 2.30-2.15 (m, 2H).

$^{13}\text{C}\{^1\text{H}\}$  NMR (75.5 MHz,  $\text{CDCl}_3$ )  $\delta$ : 133.3, 132.4, 132.2 (t,  $J = 4.8$  Hz), 129.5, 127.8, 125.5, 122.2 (t,  $J = 244.9$  Hz), 118.5, 42.2 (t,  $J = 25.9$  Hz), 31.9 (t,  $J = 25.1$  Hz), 10.4 (t,  $J = 6.0$  Hz).

$^{19}\text{F}$  NMR (282 MHz,  $\text{CDCl}_3$ )  $\delta$ : -99.4 (quint,  $J = 15.7$  Hz).

HRMS (ESI): calcd for  $\text{C}_{11}\text{H}_{10}\text{BrF}_2\text{NNa}$  ( $\text{M}+\text{Na}$ ) 295.9857, 297.9837; found 295.9849, 297.9831.

### Methyl 4-(4-cyano-2,2-difluorobutyl)benzoate (3p).

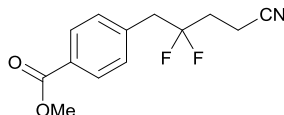

Yield 97 mg (77%). Colorless crystals. Mp 51-53°C. Chromatography: hexanes/EtOAc, from 3/1 to 2/1.  $R_f$  0.18 (hexanes/EtOAc, 3/1).

$^1\text{H}$  NMR (300 MHz,  $\text{CDCl}_3$ )  $\delta$ : 7.99 (d,  $J = 8.2$  Hz, 2H), 7.31 (d,  $J = 8.2$  Hz, 2H), 3.89 (s, 3H), 3.22 (t,  $J = 16.0$  Hz, 2H), 2.52 (t,  $J = 7.6$  Hz, 2H), 2.21-2.05 (m, 2H).

$^{13}\text{C}\{^1\text{H}\}$  NMR (75.5 MHz,  $\text{CDCl}_3$ )  $\delta$ : 166.6, 137.3 (t,  $J = 4.6$  Hz), 130.3, 129.9, 129.7, 121.9 (t,  $J = 244.3$  Hz), 118.4, 52.1, 43.0 (t,  $J = 25.5$  Hz), 32.0 (t,  $J = 25.5$  Hz), 10.3 (t,  $J = 5.9$  Hz).

$^{19}\text{F}$  NMR (282 MHz,  $\text{CDCl}_3$ )  $\delta$ : -100.1 (quint,  $J = 16.0$  Hz).

HRMS (ESI): calcd for  $\text{C}_{13}\text{H}_{14}\text{F}_2\text{NO}_2$  ( $\text{M}+\text{H}$ ) 254.0987; found 254.0988.

### 6-Cyano-4,4-difluorohexyl benzoate (3q).

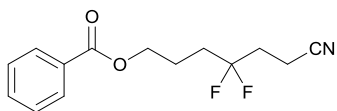

Yield 110 mg (82%). Colorless oil. Chromatography: hexanes/EtOAc, 2/1.  $R_f$  0.32 (hexanes/EtOAc, 2/1).

$^1\text{H}$  NMR (300 MHz,  $\text{CDCl}_3$ )  $\delta$ : 8.06–8.00 (m, 2H), 7.60–7.52 (m, 1H), 7.44 (t,  $J = 7.7$  Hz, 2H), 4.35 (t,  $J = 6.0$  Hz, 2H), 2.56 (t,  $J = 7.7$  Hz, 2H), 2.30–2.15 (m, 2H), 2.12–1.93 (m, 4H).

$^{13}\text{C}\{^1\text{H}\}$  NMR (75.5 MHz,  $\text{CDCl}_3$ )  $\delta$ : 166.4, 133.1, 130.0, 129.5, 128.4, 122.8 (t,  $J = 242.9$  Hz), 118.5, 63.8, 33.3 (t,  $J = 25.1$  Hz), 32.6 (t,  $J = 26.1$  Hz), 21.7 (t,  $J = 4.9$  Hz), 10.5 (t,  $J = 5.8$  Hz).

$^{19}\text{F}$  NMR (282 MHz,  $\text{CDCl}_3$ )  $\delta$ : –102.4 (quint,  $J = 16.2$  Hz).

HRMS (ESI): calcd for  $\text{C}_{14}\text{H}_{16}\text{F}_2\text{NO}_2$  (M+H) 268.1144; found 268.1155.

### Diethyl (3,3-difluoro-4-phenylbutyl)phosphonate (3r).

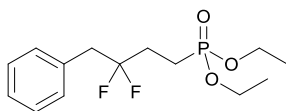

Yield 124 mg (81%). Colorless oil. Chromatography: EtOAc,  $R_f$  0.22 (EtOAc).

$^1\text{H}$  NMR (300 MHz,  $\text{CDCl}_3$ )  $\delta$ : 7.32–7.22 (m, 5H), 4.10–3.99 (m, 4H), 3.13 (t,  $J = 15.9$  Hz, 2H), 2.12–1.83 (m, 4H), 1.26 (t,  $J = 7.1$  Hz, 6H).

$^{13}\text{C}\{^1\text{H}\}$  NMR (75.5 MHz,  $\text{CDCl}_3$ )  $\delta$ : 132.8 (t,  $J = 4.8$  Hz), 130.2, 128.5, 127.5, 123.0 (td,  $J = 243.4$ , 19.0 Hz), 61.7 (d,  $J = 6.5$  Hz), 43.1 (t,  $J = 29.5$  Hz), 29.3 (td,  $J = 26.1$ , 3.7 Hz), 18.5 (dt,  $J = 145.7$ , 4.6 Hz), 16.3 (d,  $J = 6.0$  Hz).

$^{19}\text{F}$  NMR (282 MHz,  $\text{CDCl}_3$ )  $\delta$ : –99.7 (quint,  $J = 15.9$  Hz).

$^{31}\text{P}$  NMR (121 MHz,  $\text{CDCl}_3$ )  $\delta$ : 30.3.

HRMS (ESI): calcd for  $\text{C}_{14}\text{H}_{22}\text{F}_2\text{O}_3\text{P}$  (M+H) 307.1269; found 307.1272.

### 6-(Diethoxyphosphoryl)-4,4-difluorohexyl benzoate (3s).

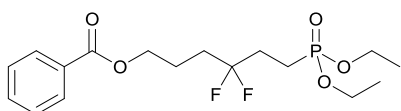

Yield 132 mg (70%). Colorless oil. Chromatography: EtOAc.  $R_f$  0.36 (EtOAc).

$^1\text{H}$  NMR (300 MHz,  $\text{CDCl}_3$ )  $\delta$ : 8.00 (d,  $J = 7.1$  Hz, 2H), 7.52 (t,  $J = 7.4$  Hz, 1H), 7.40 (t,  $J = 7.5$  Hz, 2H), 4.32 (t,  $J = 5.5$  Hz, 2H), 4.06 (td,  $J = 7.1$ , 2.9 Hz, 4H), 2.22–1.85 (m, 8H), 1.29 (t,  $J = 7.1$  Hz, 6H).

$^{13}\text{C}\{^1\text{H}\}$  NMR (75.5 MHz,  $\text{CDCl}_3$ )  $\delta$ : 166.4, 133.0, 130.1, 129.6, 128.4, 123.6 (td,  $J = 242.0$ , 18.8 Hz), 64.0, 61.9 (d,  $J = 6.5$  Hz), 33.3 (t,  $J = 25.7$  Hz), 30.4 (td,  $J = 26.6$ , 4.1 Hz), 21.9 (t,  $J = 4.7$  Hz), 18.6 (dt,  $J = 145.6$ , 4.6 Hz), 16.4 (d,  $J = 5.8$  Hz).

$^{19}\text{F}$  NMR (282 MHz,  $\text{CDCl}_3$ )  $\delta$ : –102.2 (quint,  $J = 16.0$  Hz).

$^{31}\text{P}\{^1\text{H}\}$  NMR (121 MHz,  $\text{CDCl}_3$ )  $\delta$ : 30.3.

HRMS (ESI): calcd for  $\text{C}_{17}\text{H}_{26}\text{F}_2\text{O}_5\text{P}$  (M+H) 379.1480; found 379.1491.



**[2,2-Difluoro-4-(phenylsulfonyl)butyl]benzene (3t).**

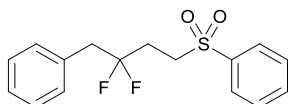

Yield 133 mg (86%). Colorless crystals. Mp 63–64°C (hexanes). Chromatography: hexanes/EtOAc, from 3/1 to 2/1.  $R_f$  0.33 (hexanes/EtOAc, 3/1).

$^1\text{H}$  NMR (300 MHz,  $\text{CDCl}_3$ )  $\delta$ : 7.87 (dd,  $J = 7.2, 1.4$  Hz, 2H), 7.67 (tt,  $J = 7.4, 1.3$  Hz, 1H), 7.56 (tt,  $J = 7.5, 1.2$  Hz, 2H), 7.33–7.28 (m, 3H), 7.22–7.17 (m, 2H), 3.28–3.22 (m, 2H), 3.15 (t,  $J = 15.9$  Hz, 2H), 2.33–2.16 (m, 2H).

$^{13}\text{C}\{^1\text{H}\}$  NMR (75.5 MHz,  $\text{CDCl}_3$ )  $\delta$ : 138.9, 134.1, 132.3 (t,  $J = 4.9$  Hz), 130.3, 129.6, 128.8, 128.1, 127.9, 122.5 (t,  $J = 244.1$  Hz), 49.7 (t,  $J = 3.8$  Hz), 43.6 (t,  $J = 25.5$  Hz), 29.3 (t,  $J = 25.7$  Hz).

$^{19}\text{F}$  NMR (282 MHz,  $\text{CDCl}_3$ )  $\delta$ : -98.3 (quint,  $J = 15.9$  Hz).

HRMS (ESI): calcd for  $\text{C}_{16}\text{H}_{16}\text{F}_2\text{O}_2\text{SNa}$  ( $\text{M}+\text{Na}$ ) 333.0731; found 333.0738.

**[(3,3-Difluoro-4-phenylpentyl)sulfonyl]benzene (3u).**

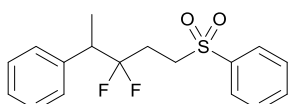

Yield 113 mg (70%). Colorless crystals. Mp 96–98°C (hexanes/EtOAc, 1/1). Chromatography: hexanes/EtOAc, 3/1.  $R_f$  0.33 (hexanes/EtOAc, 3/1).

$^1\text{H}$  NMR (300 MHz,  $\text{CDCl}_3$ )  $\delta$ : 7.84 (dd,  $J = 7.2, 1.4$  Hz, 2H), 7.65 (tt,  $J = 7.4, 1.3$  Hz, 1H), 7.53 (t,  $J = 7.5, 1.4$  Hz, 2H), 7.34–7.25 (m, 3H), 7.25–7.20 (m, 2H), 3.31–3.07 (m, 3H), 2.28–2.08 (m, 2H), 1.42 (d,  $J = 7.2$  Hz, 3H).

$^{13}\text{C}\{^1\text{H}\}$  NMR (75.5 MHz,  $\text{CDCl}_3$ )  $\delta$ : 138.7, 138.6 (dd,  $J = 6.2, 1.2$  Hz), 134.0, 129.4, 128.7, 128.5 (t,  $J = 1.5$  Hz), 127.9, 127.8, 123.7 (t,  $J = 248.1, 246.3$  Hz), 49.6 (t,  $J = 4.3$  Hz), 46.7 (dd,  $J = 24.2, 23.3$  Hz), 28.5 (t,  $J = 26.0$  Hz), 14.5 (t,  $J = 4.8$  Hz).

$^{19}\text{F}$  NMR (282 MHz,  $\text{CDCl}_3$ )  $\delta$ : -102.6 (dm,  $J = 240.4$  Hz, 1F), -108.6 (dm,  $J = 240.4$  Hz, 1F).

HRMS (ESI): calcd for  $\text{C}_{17}\text{H}_{18}\text{F}_2\text{O}_2\text{SNa}$  ( $\text{M}+\text{Na}$ ) 347.0888; found 347.0881.

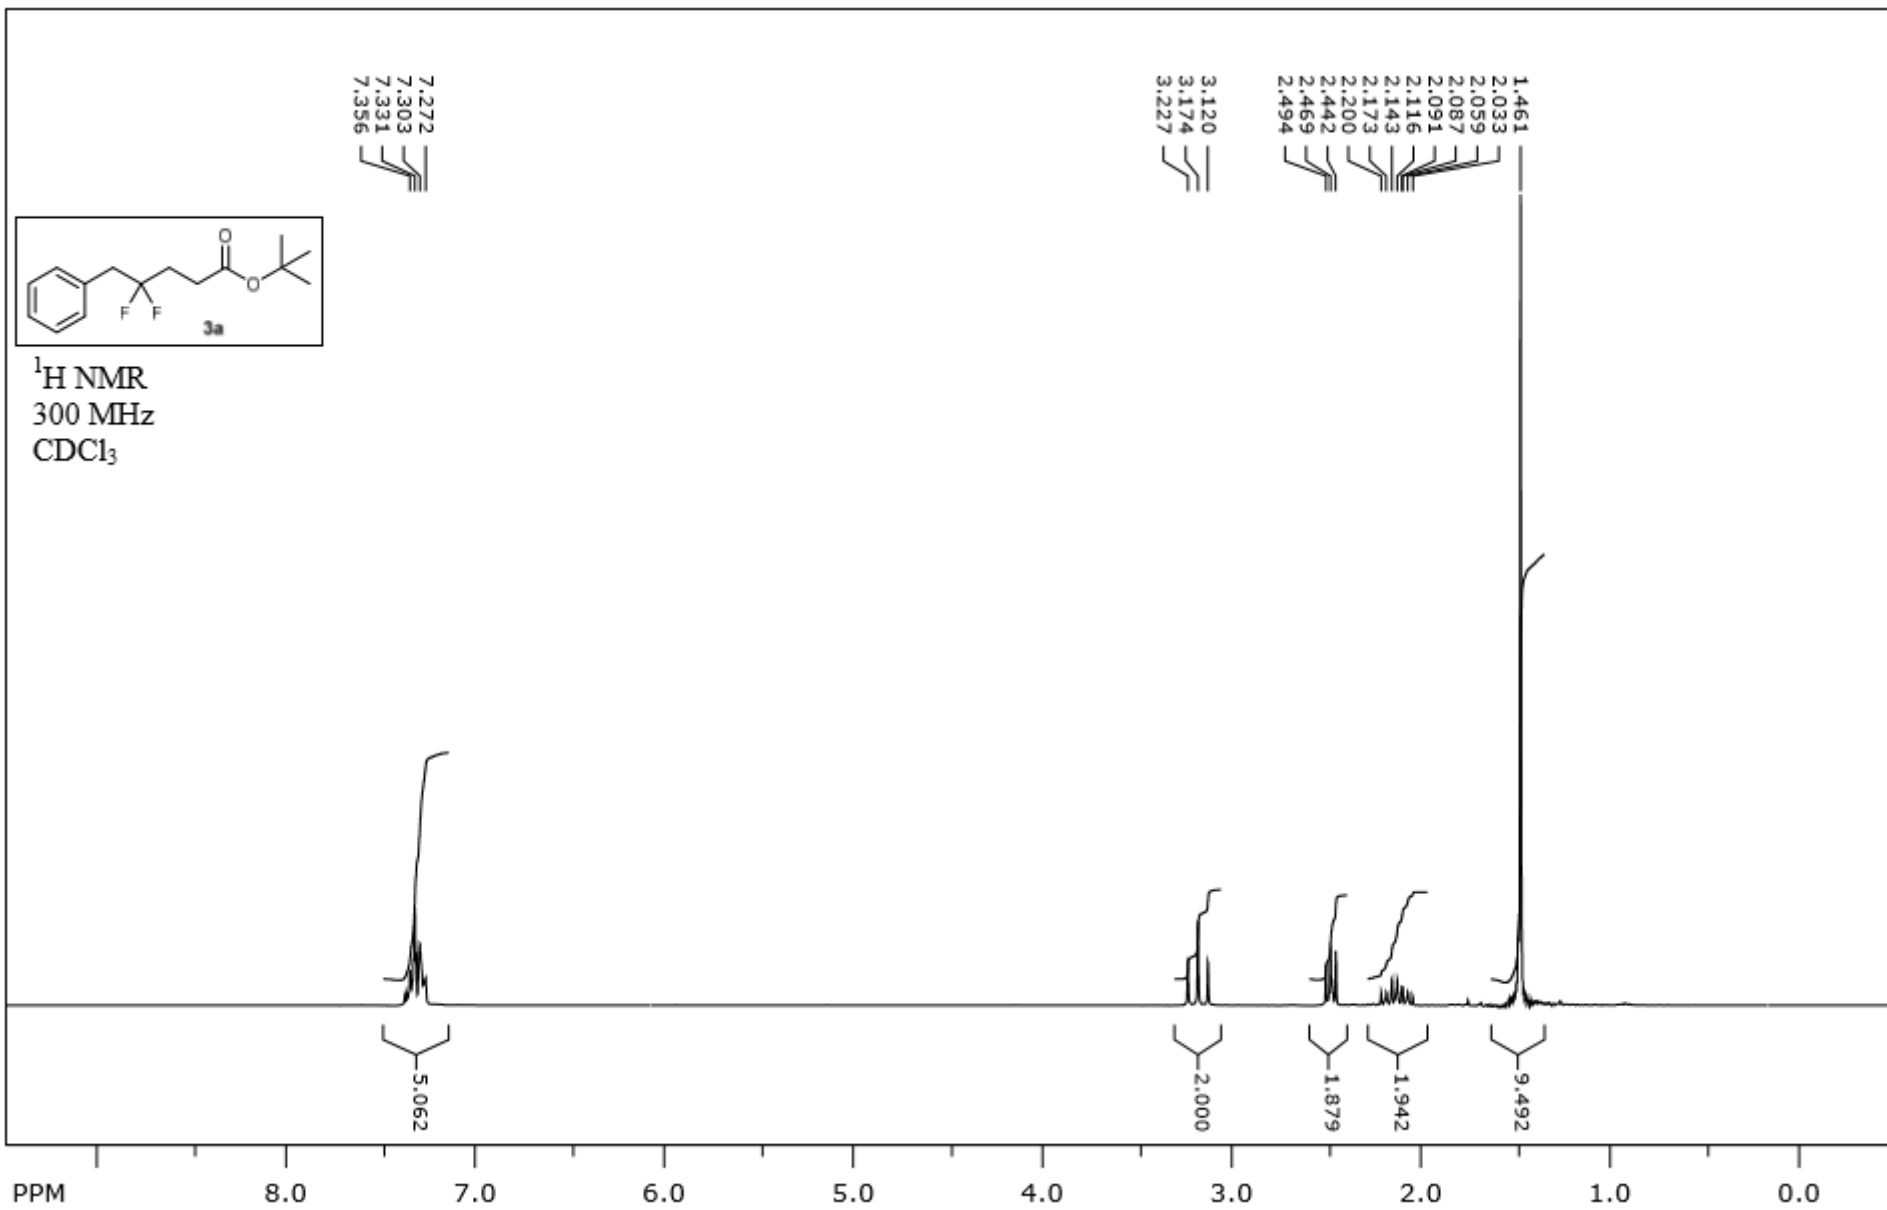

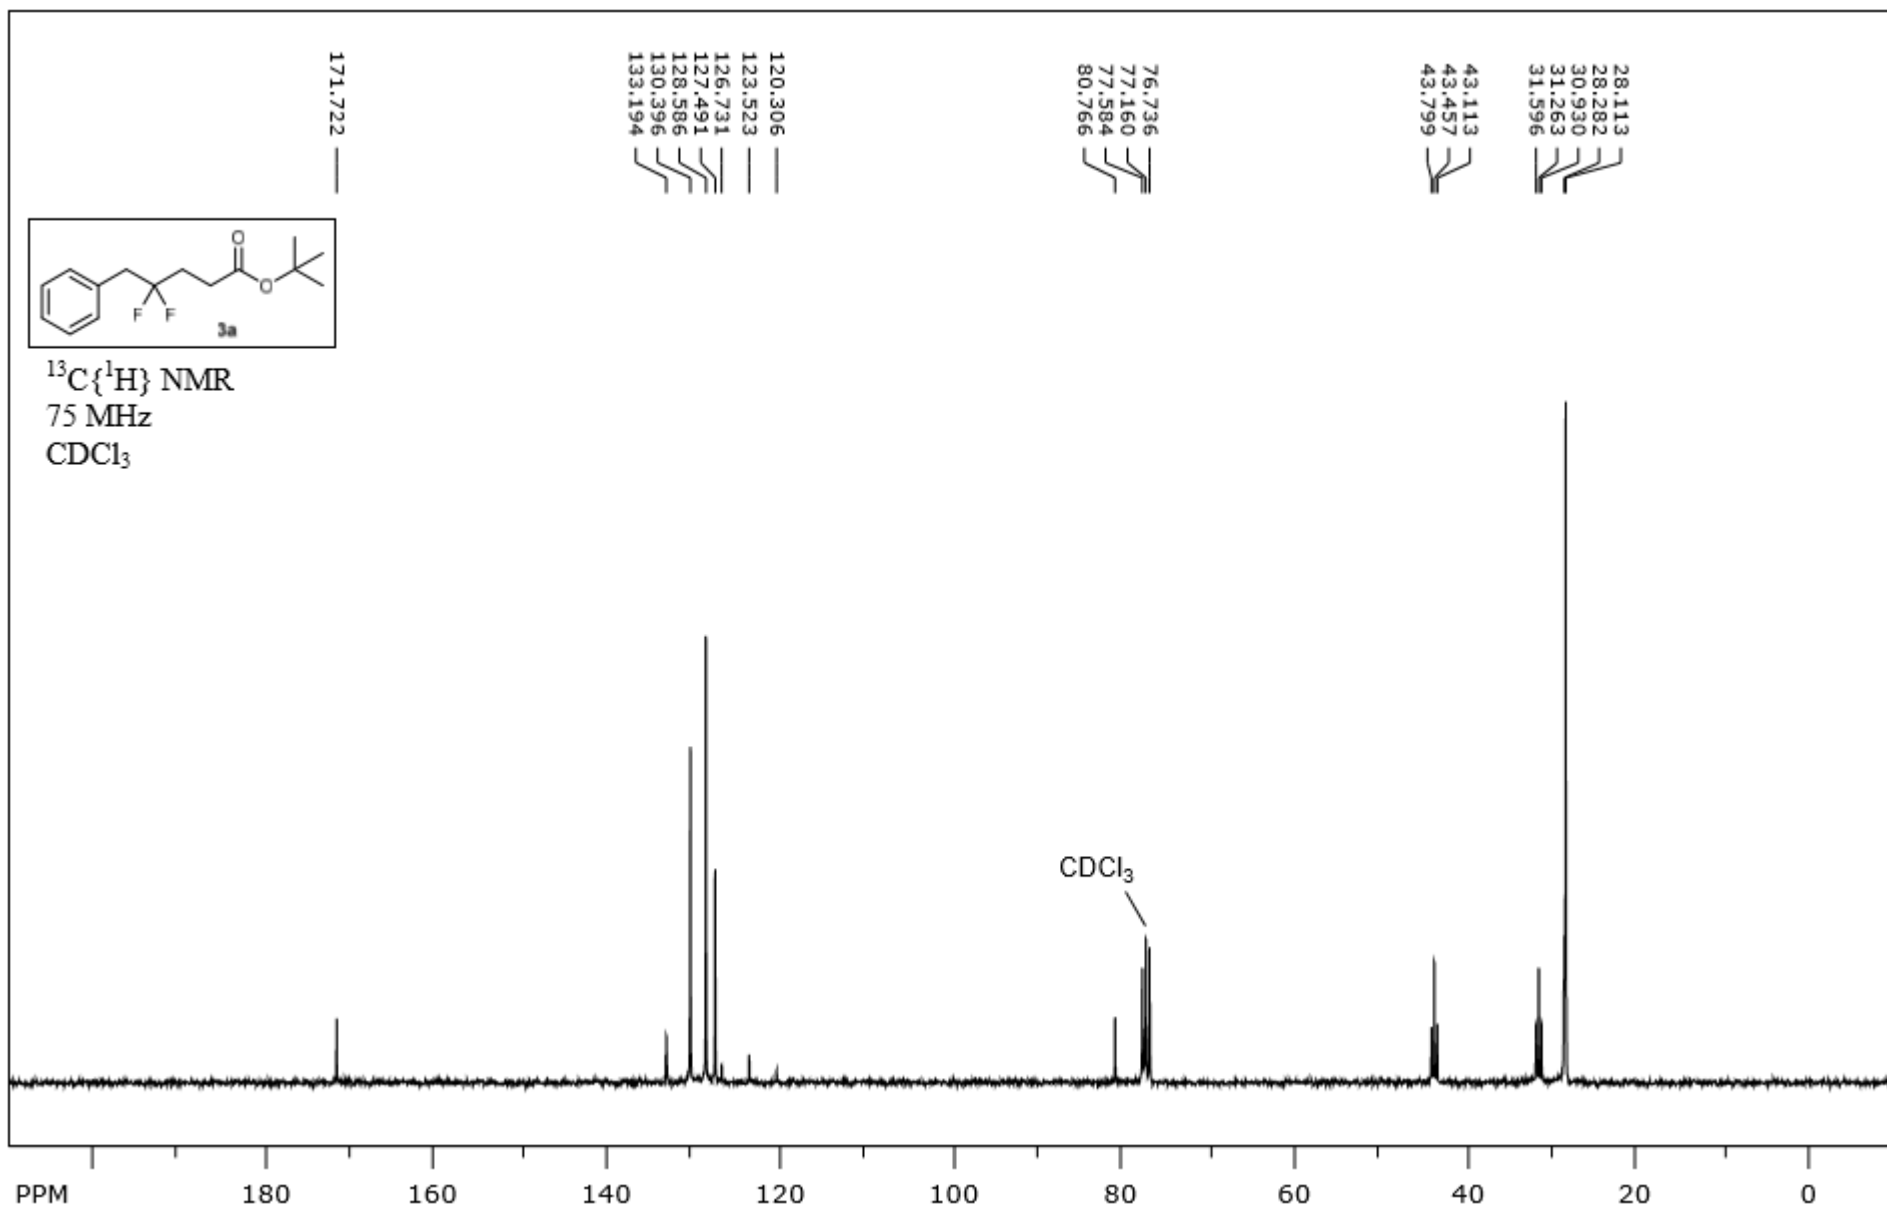

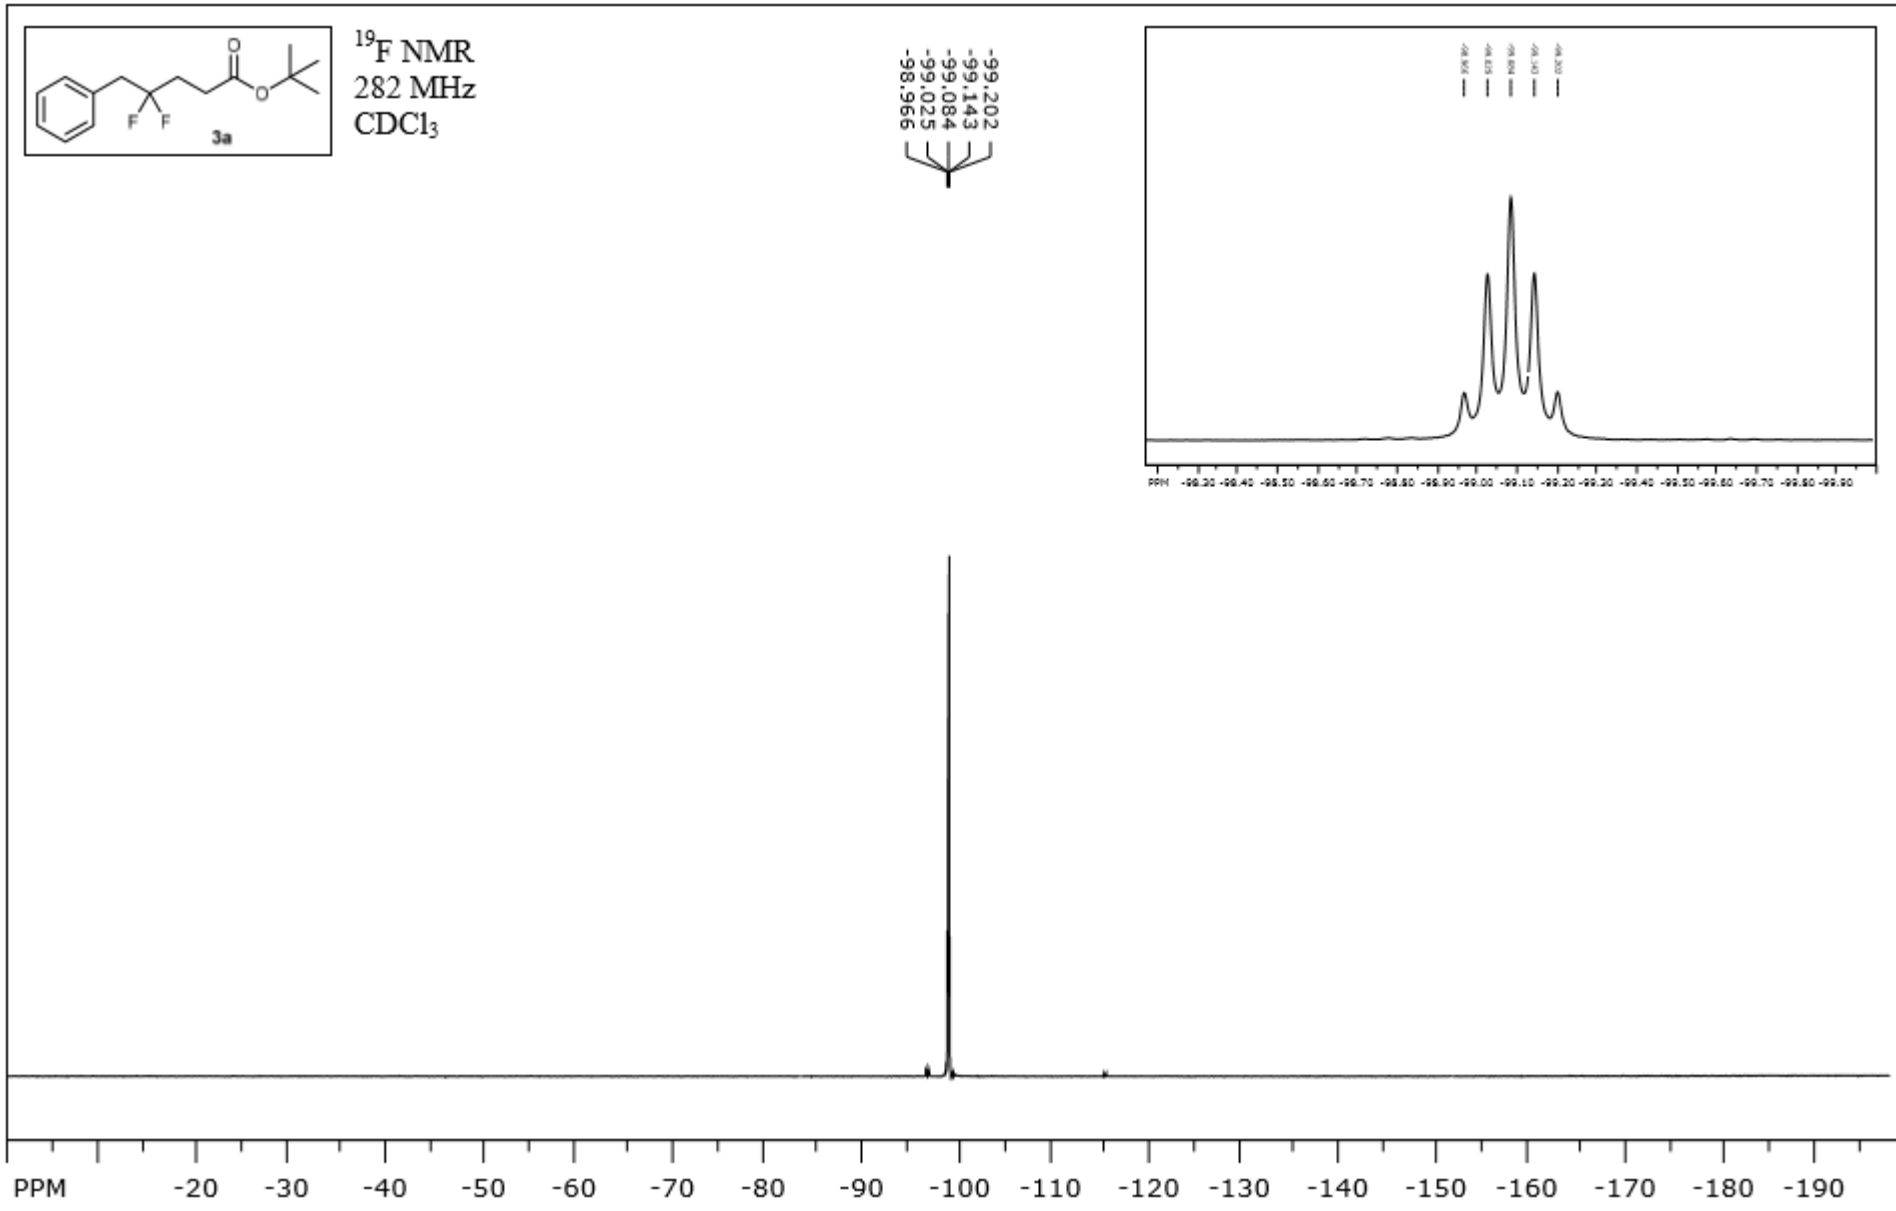

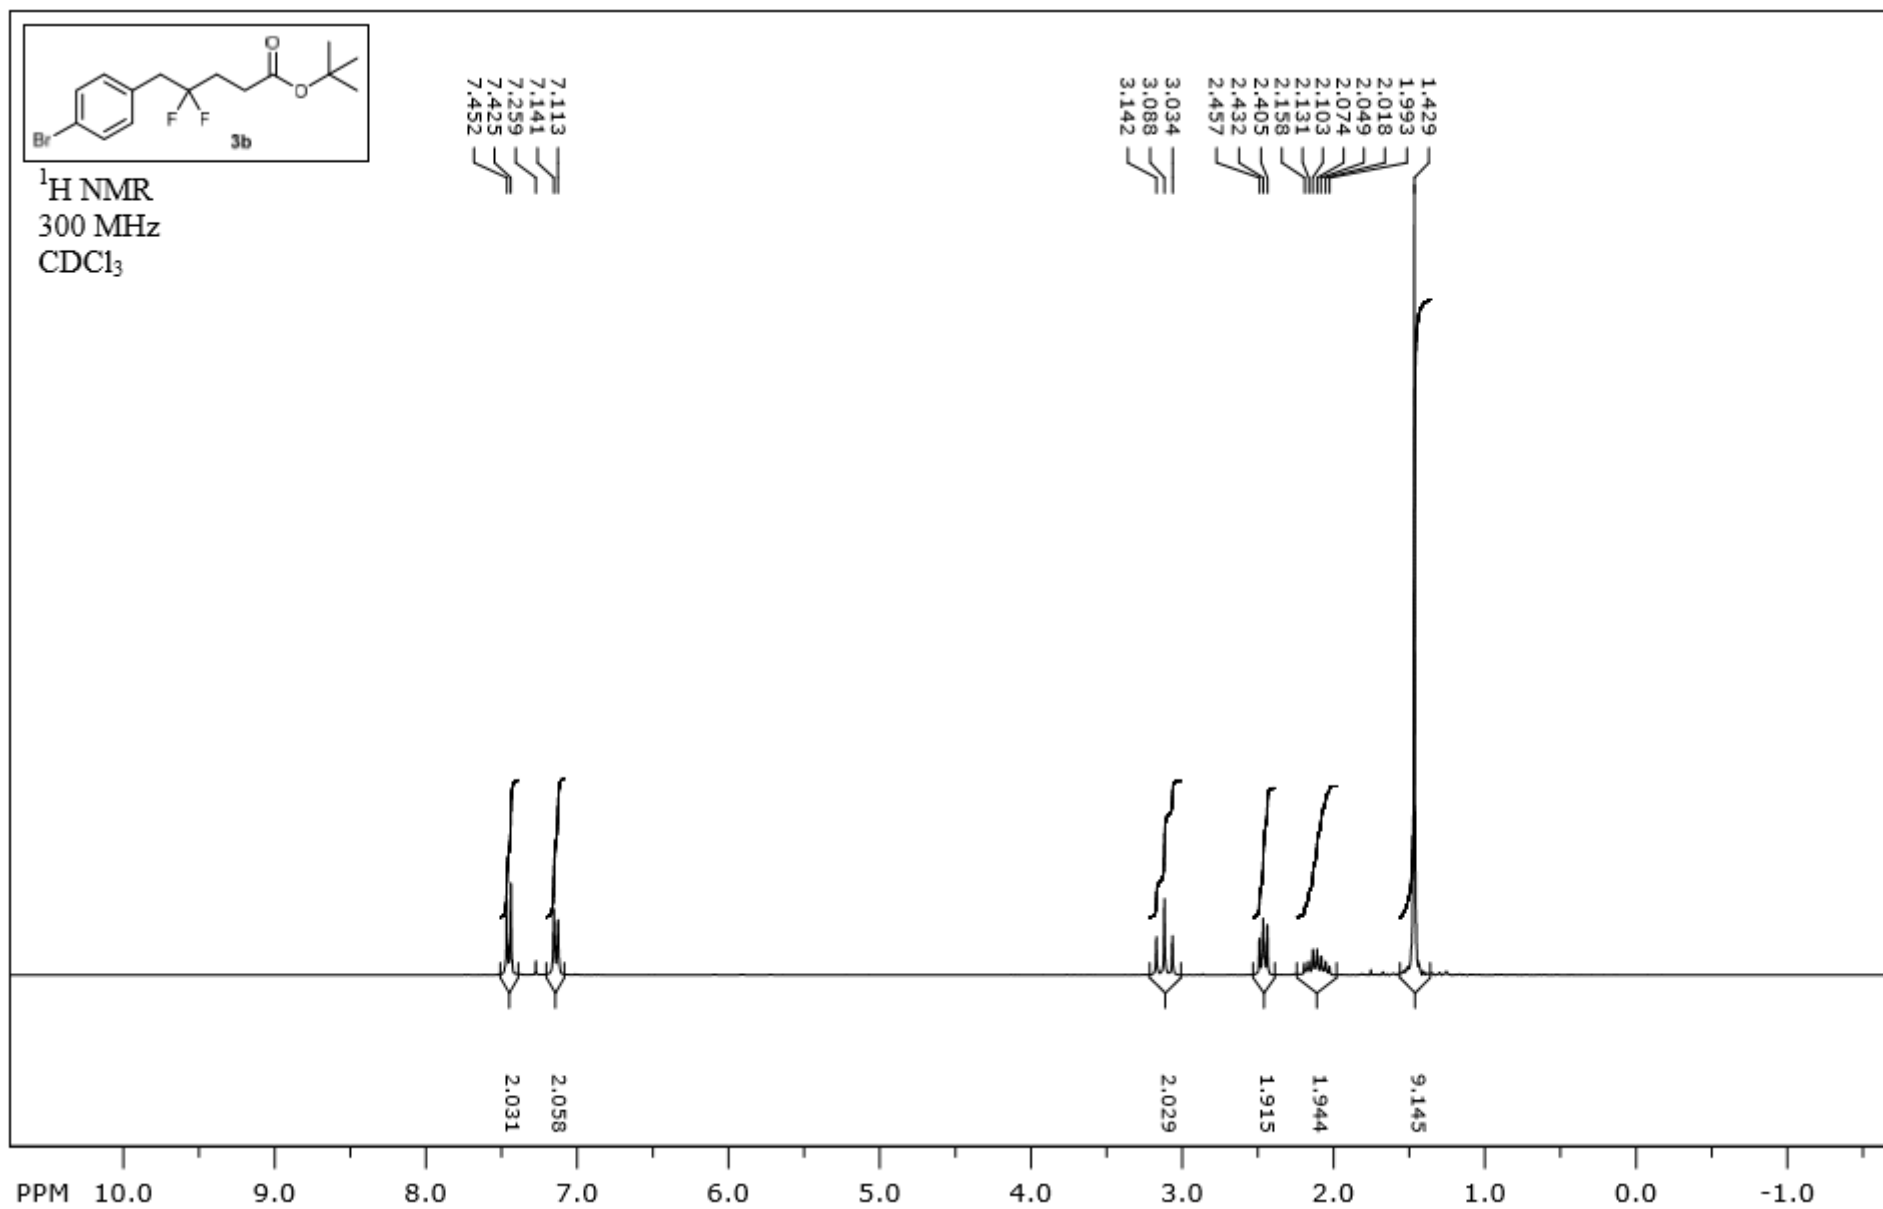

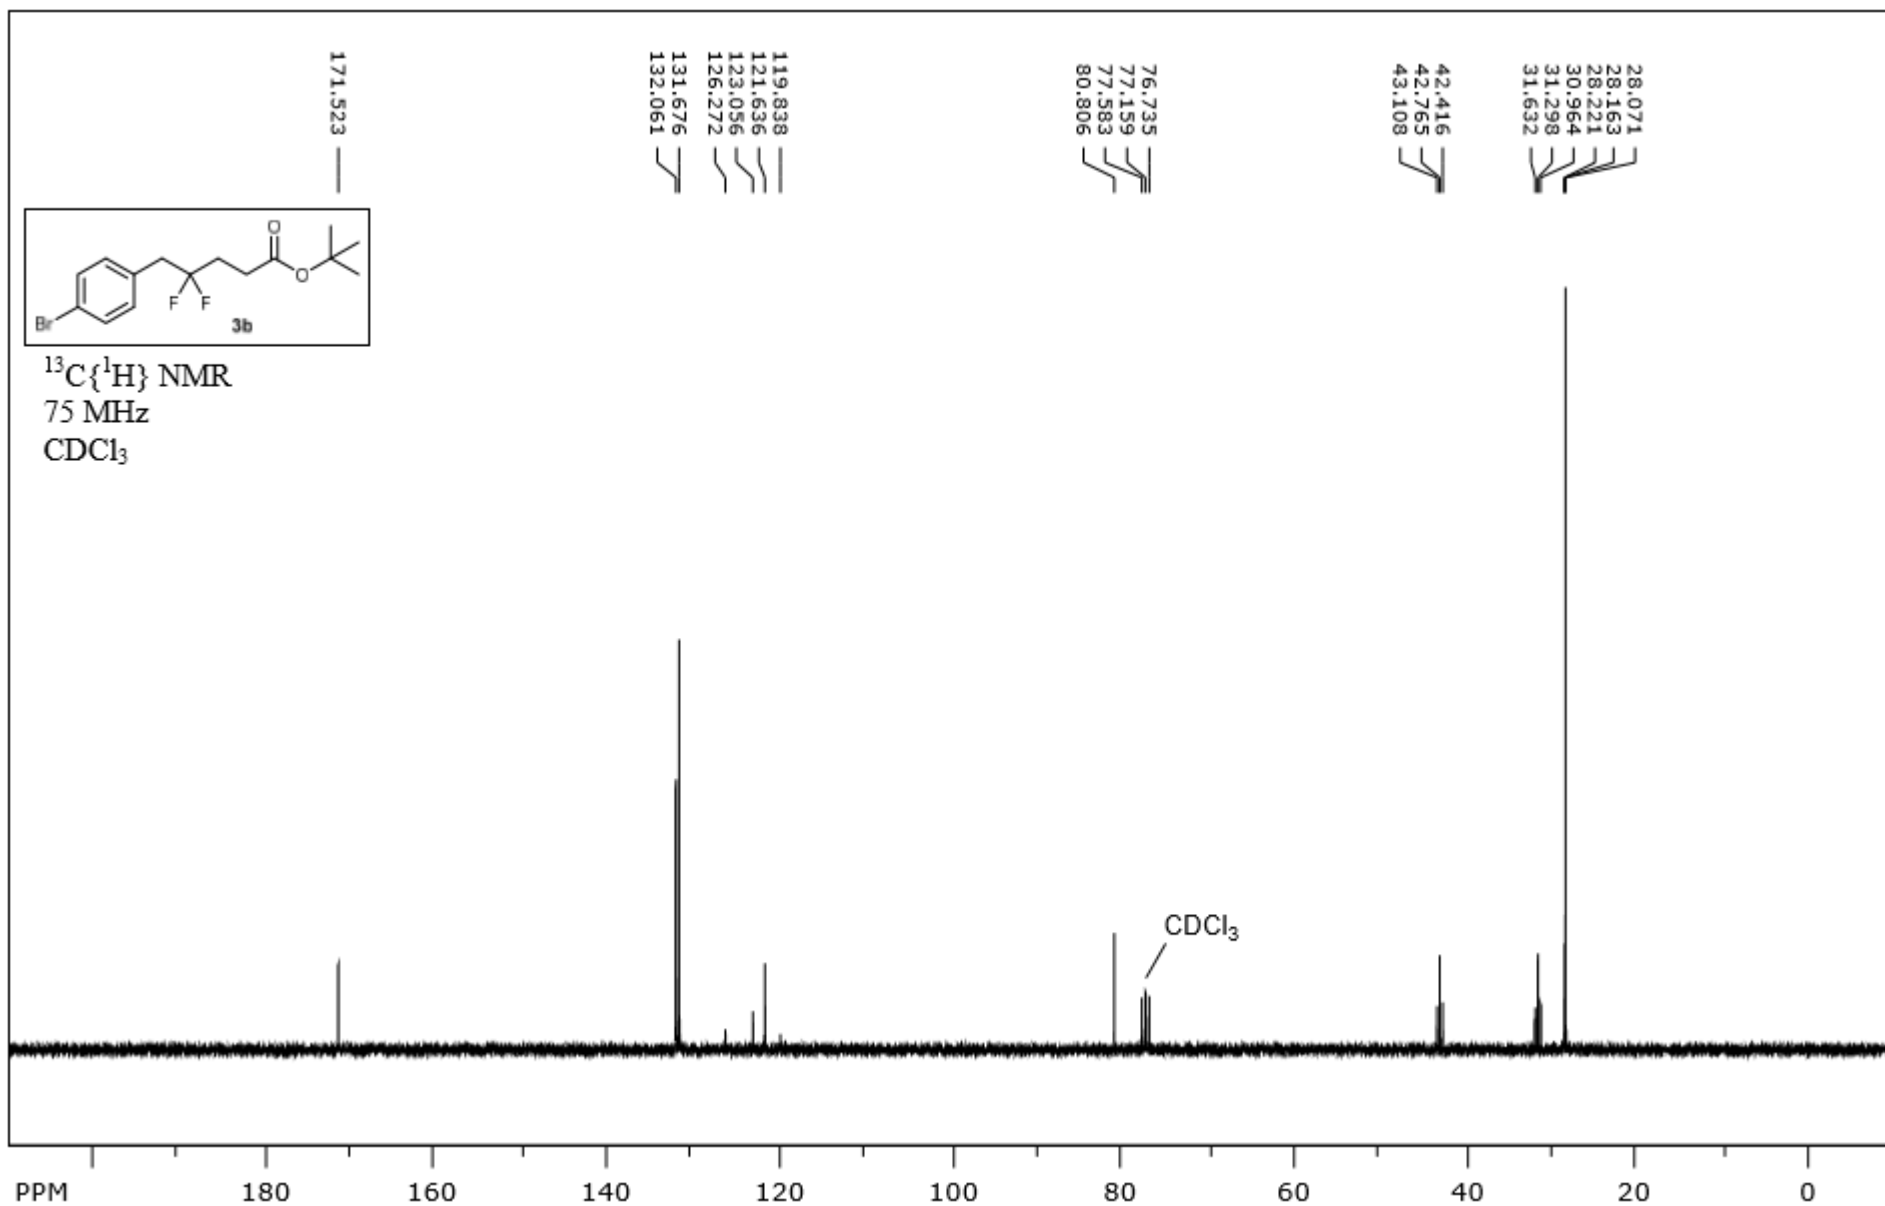

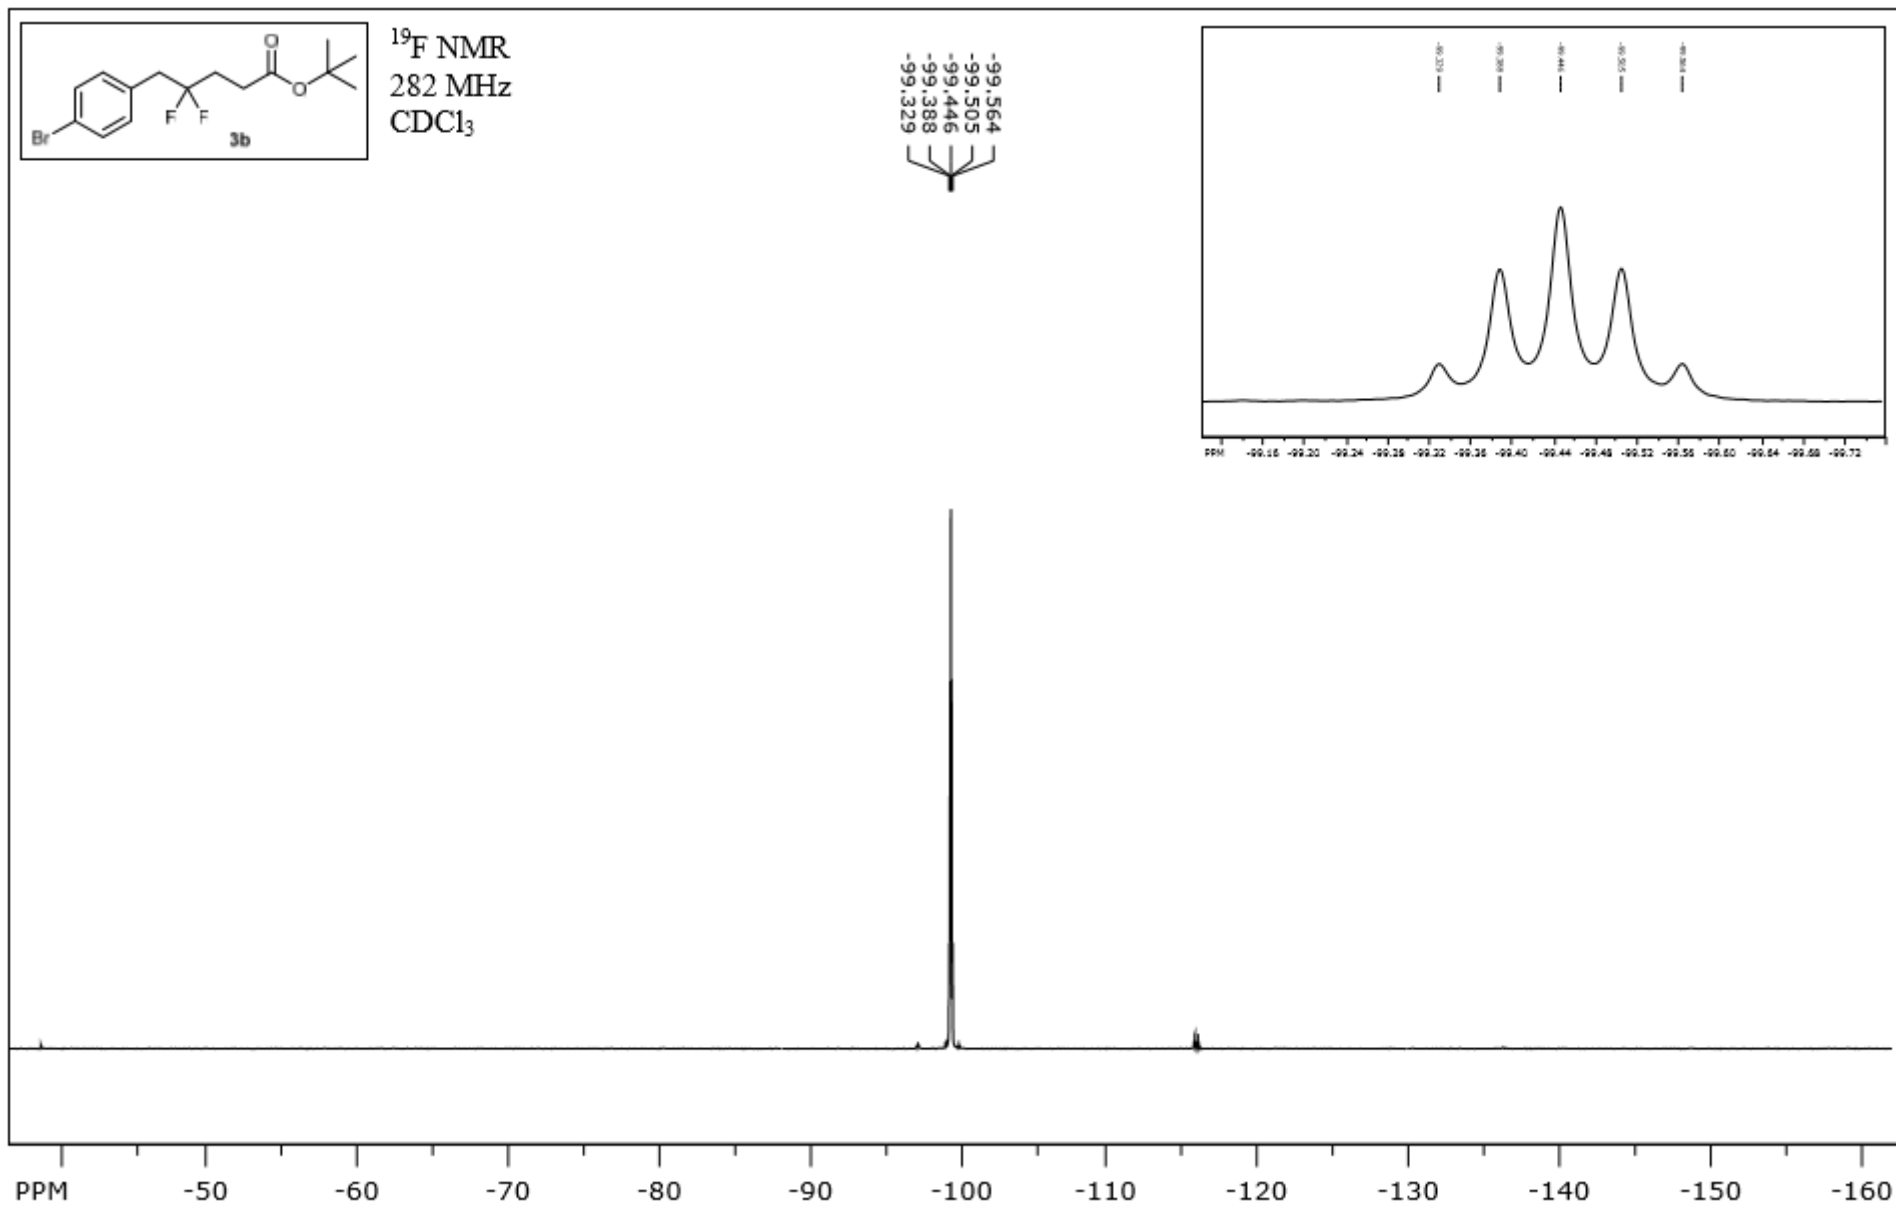

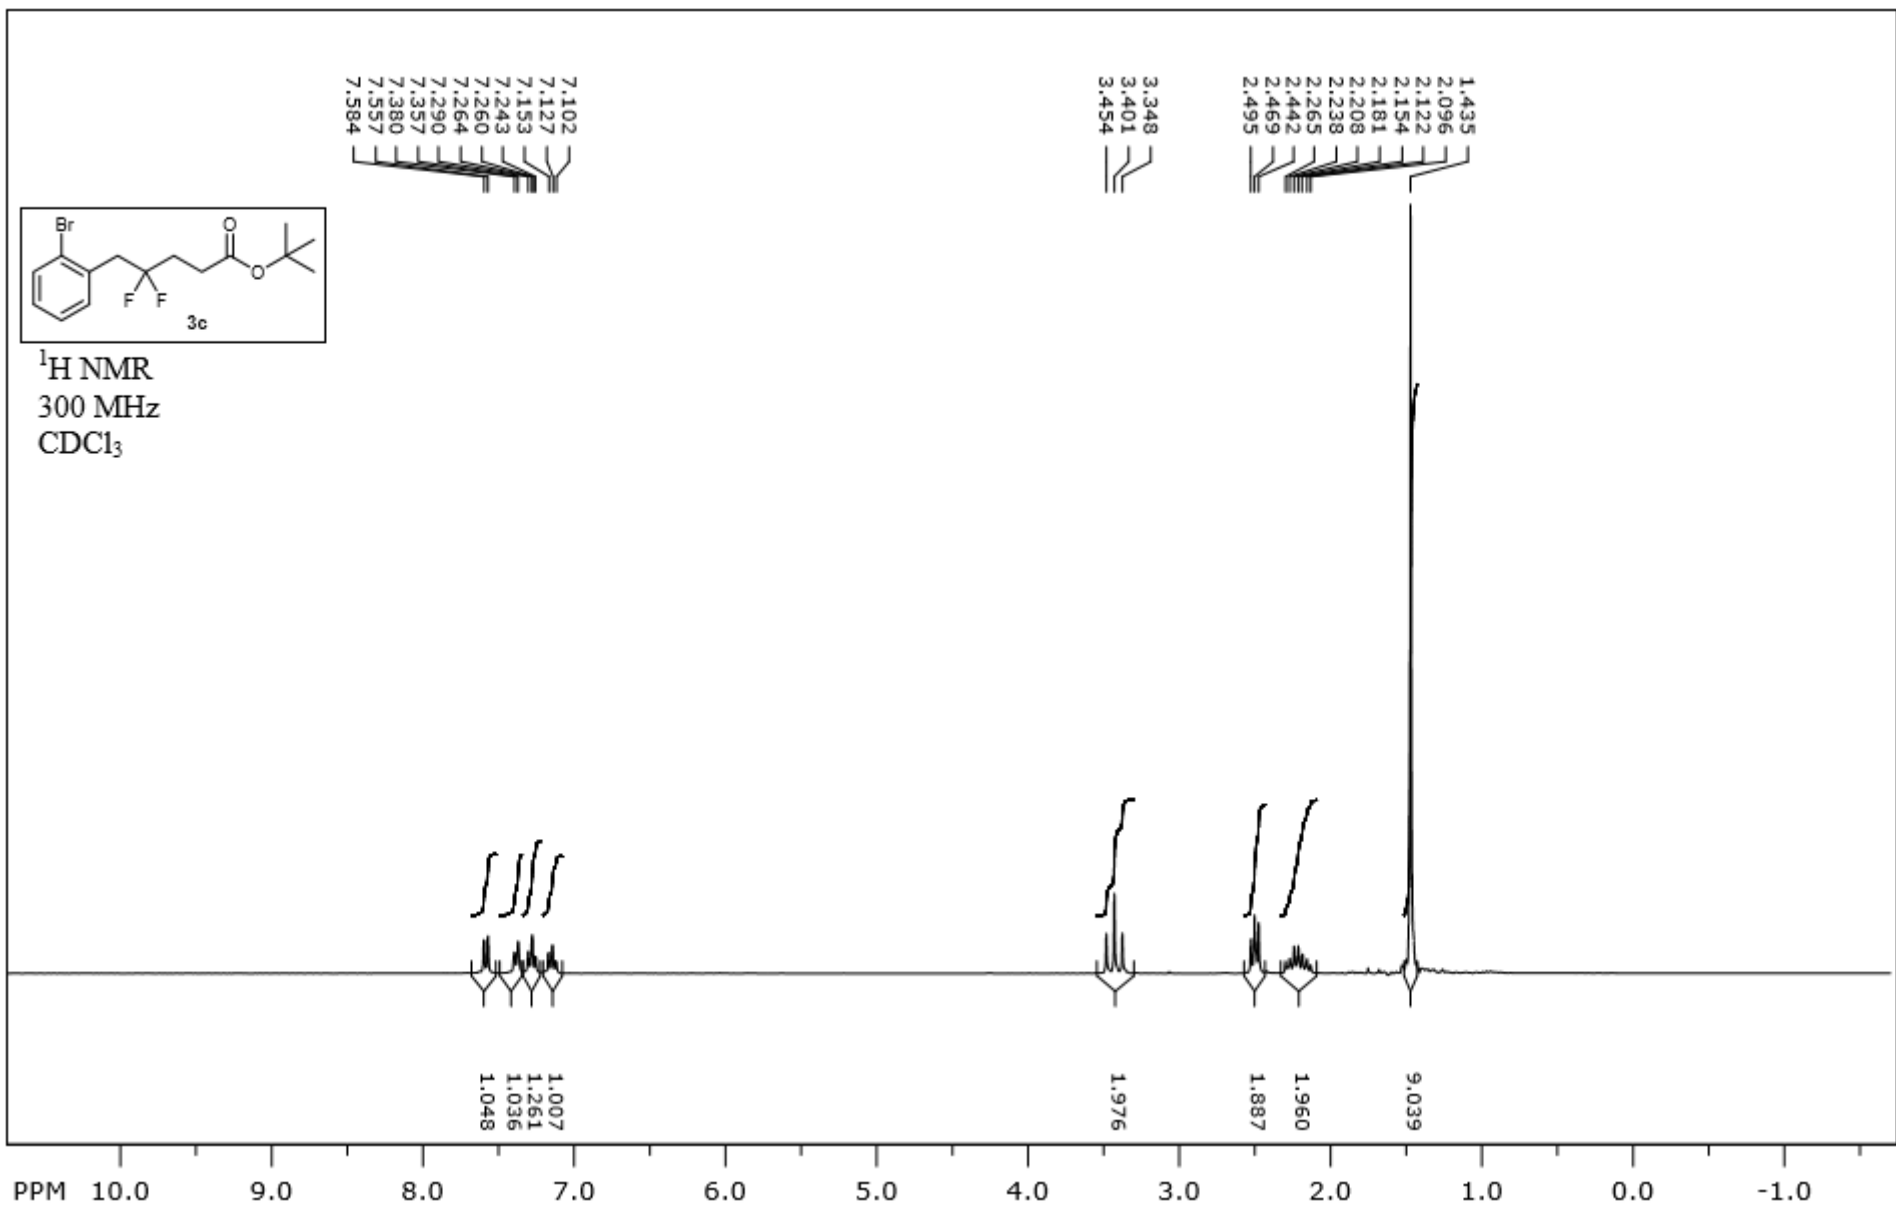



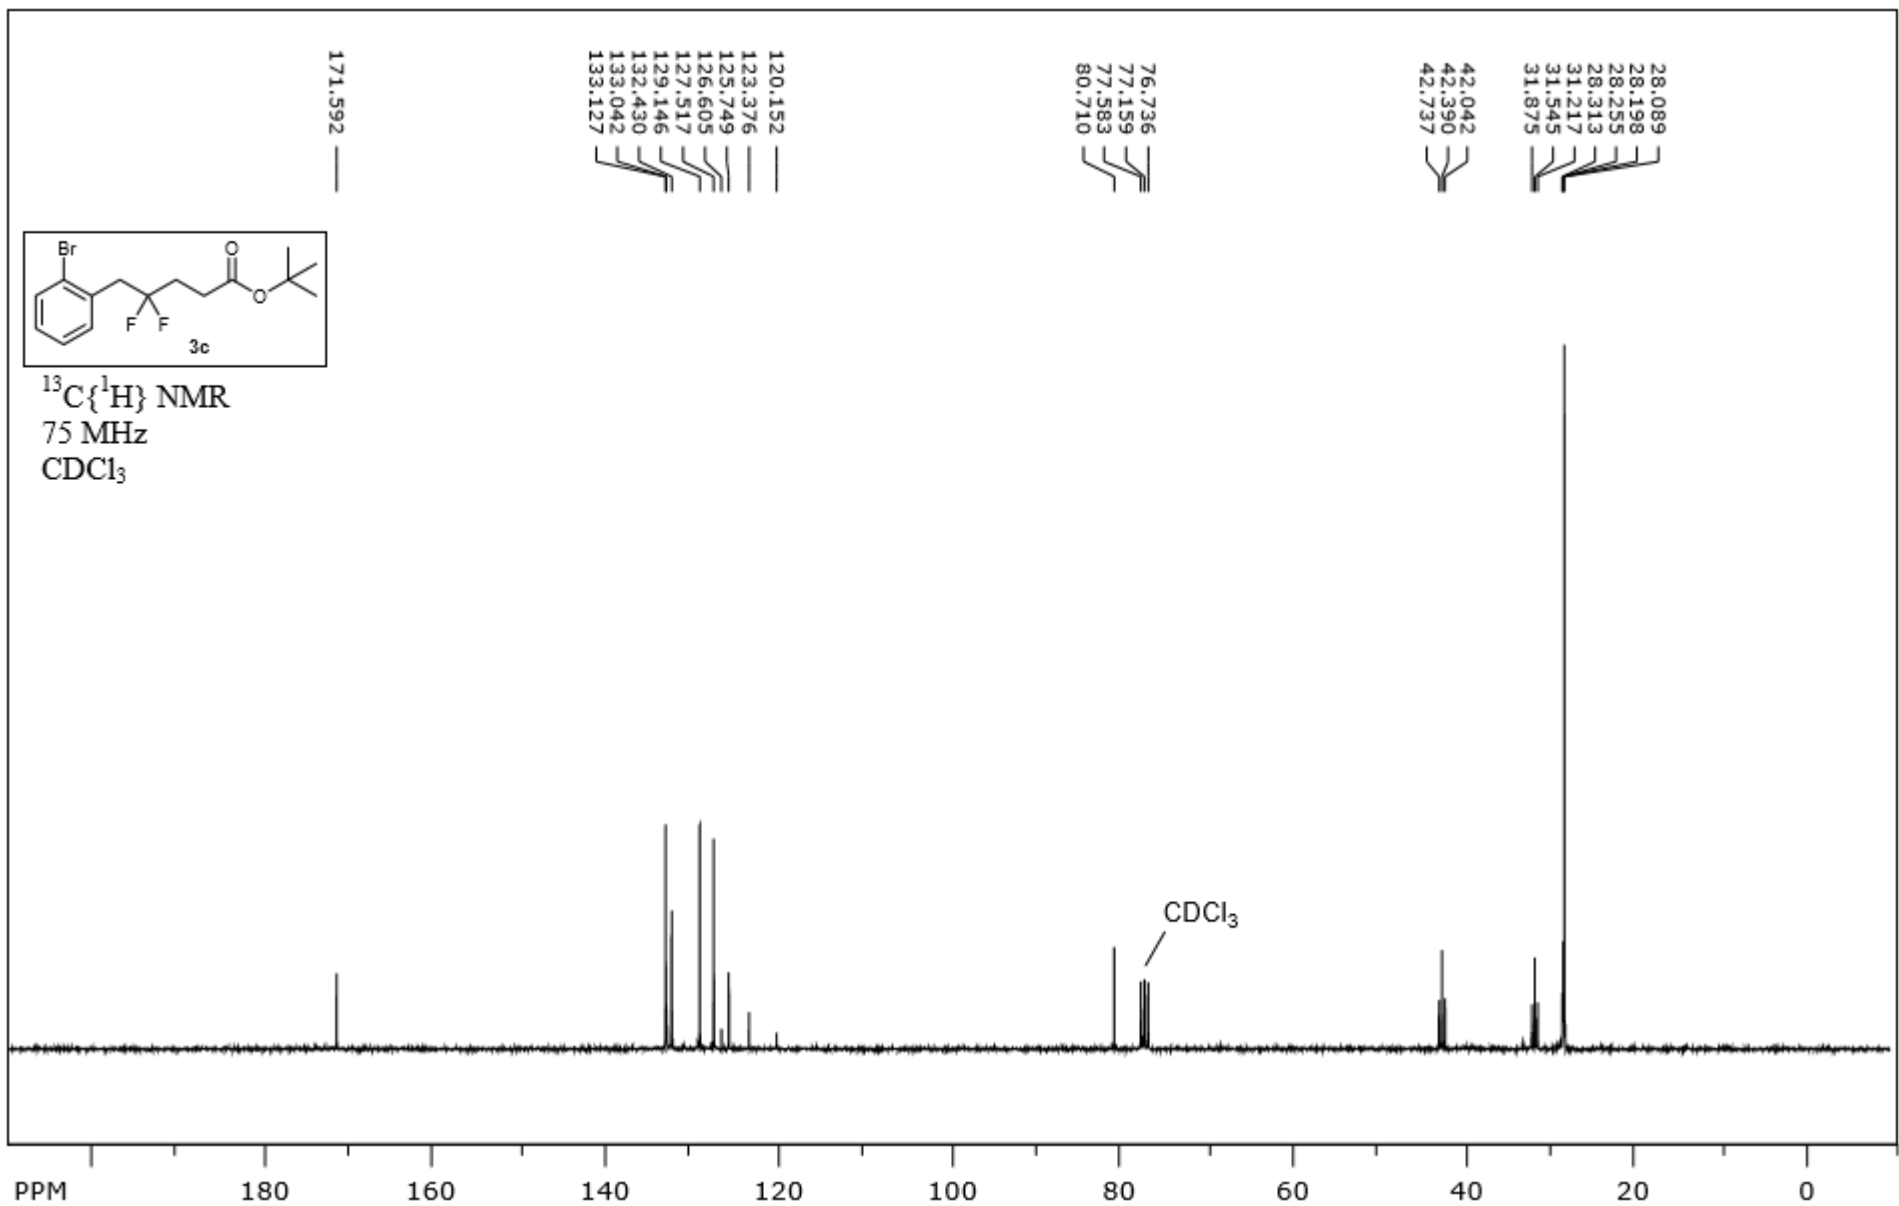

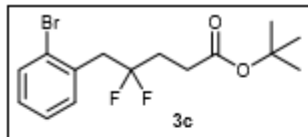

$^{19}\text{F}$  NMR  
282 MHz  
 $\text{CDCl}_3$

-98.806  
-98.747  
-98.688  
-98.630  
-98.571

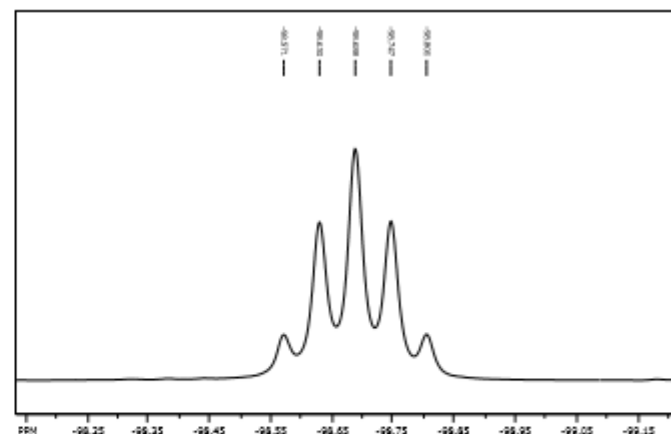

PPM -50 -60 -70 -80 -90 -100 -110 -120 -130 -140 -150

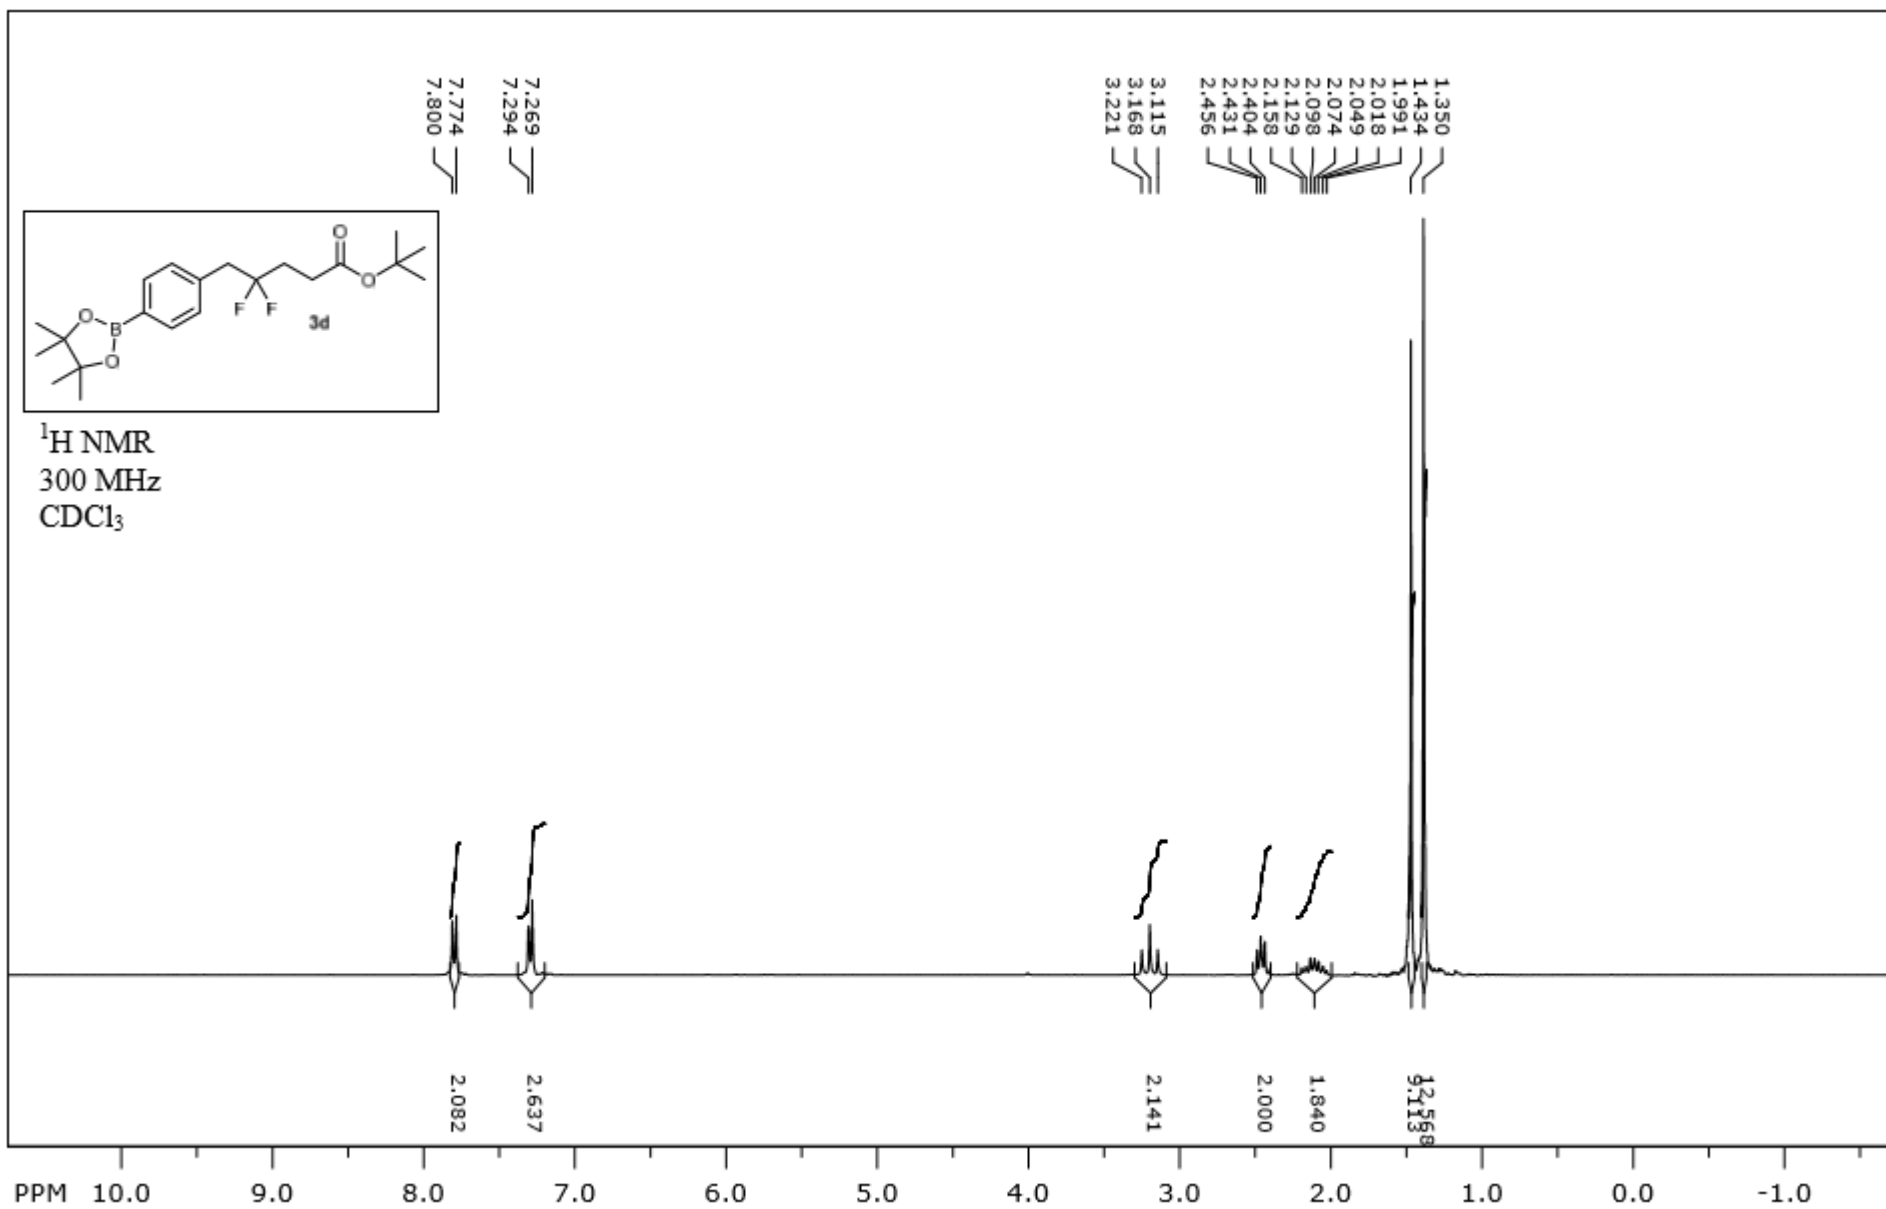

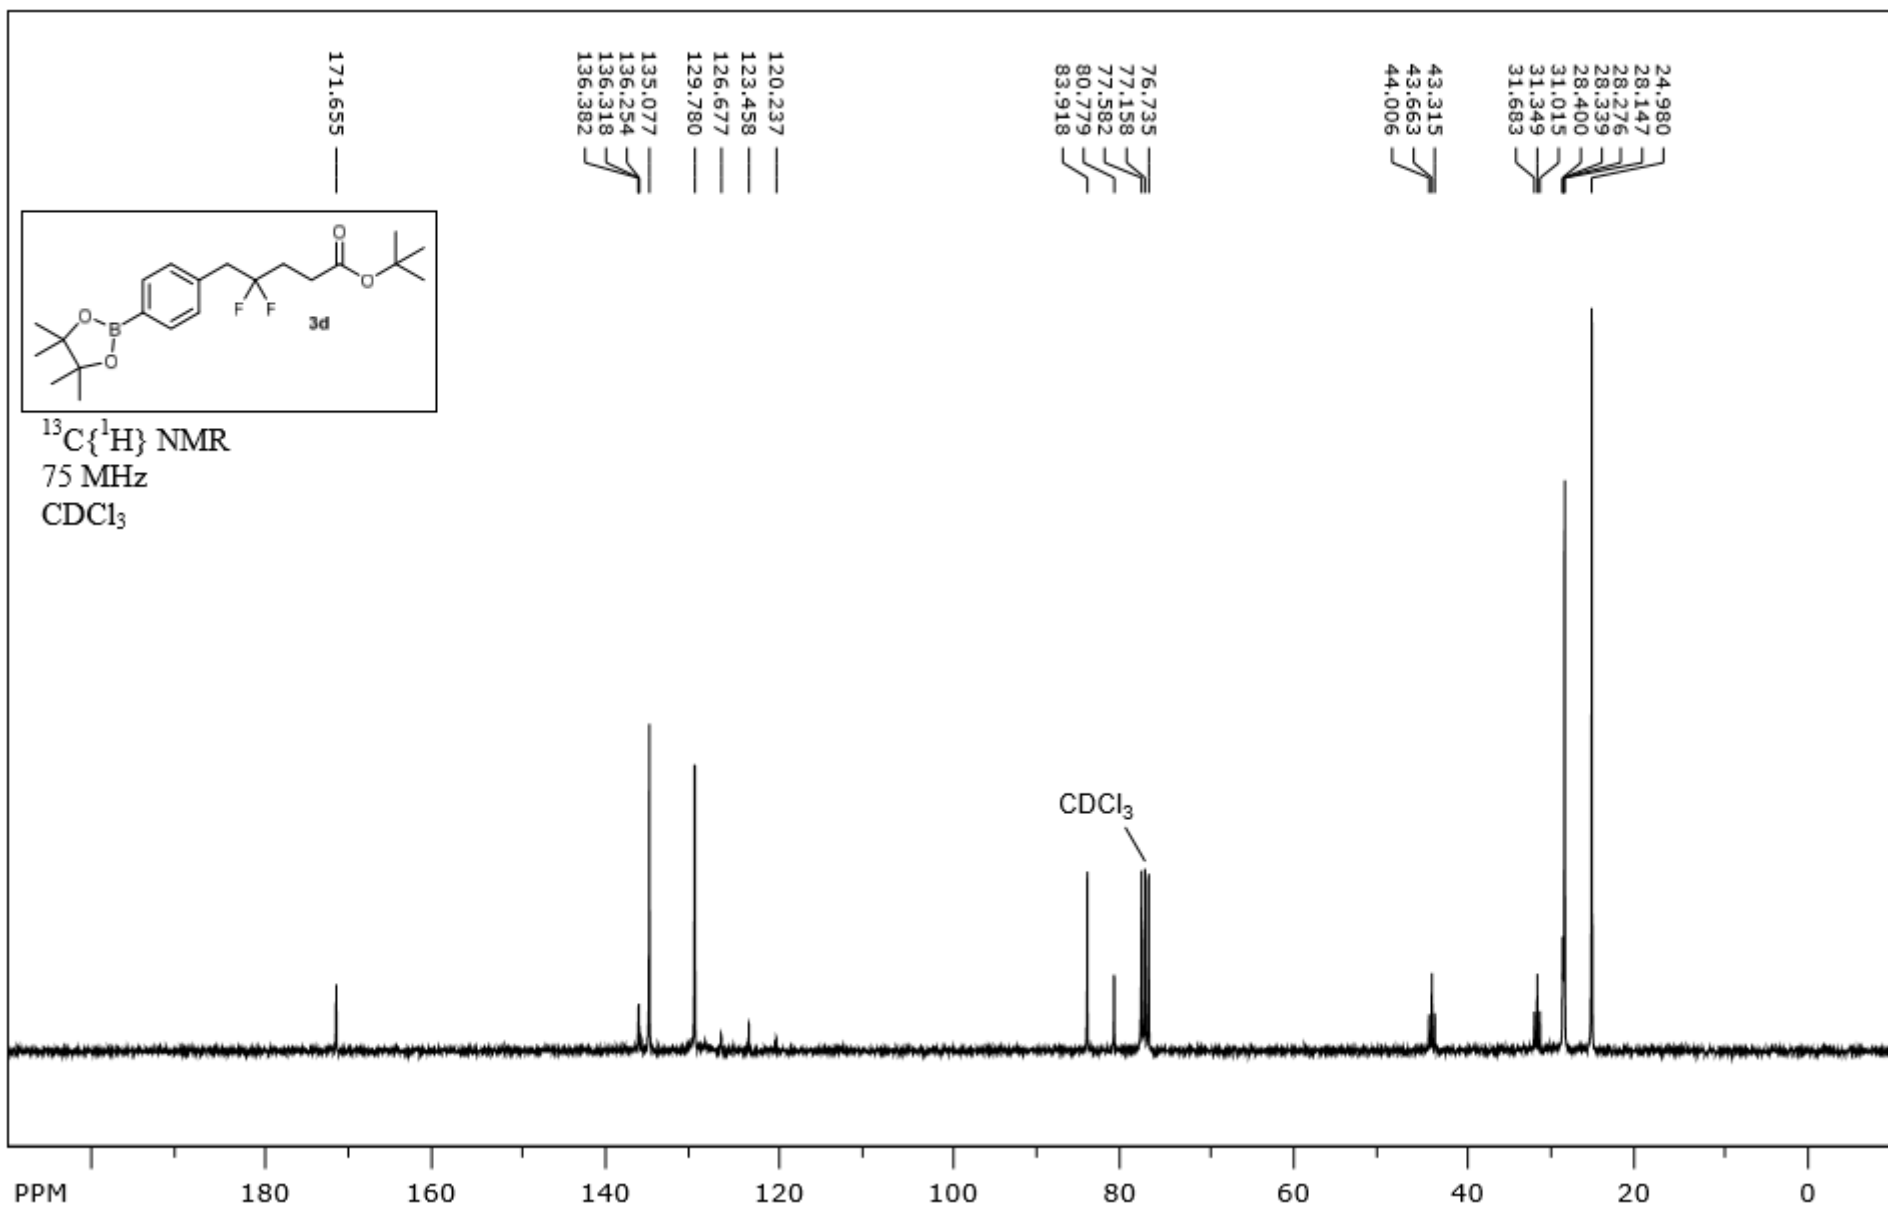

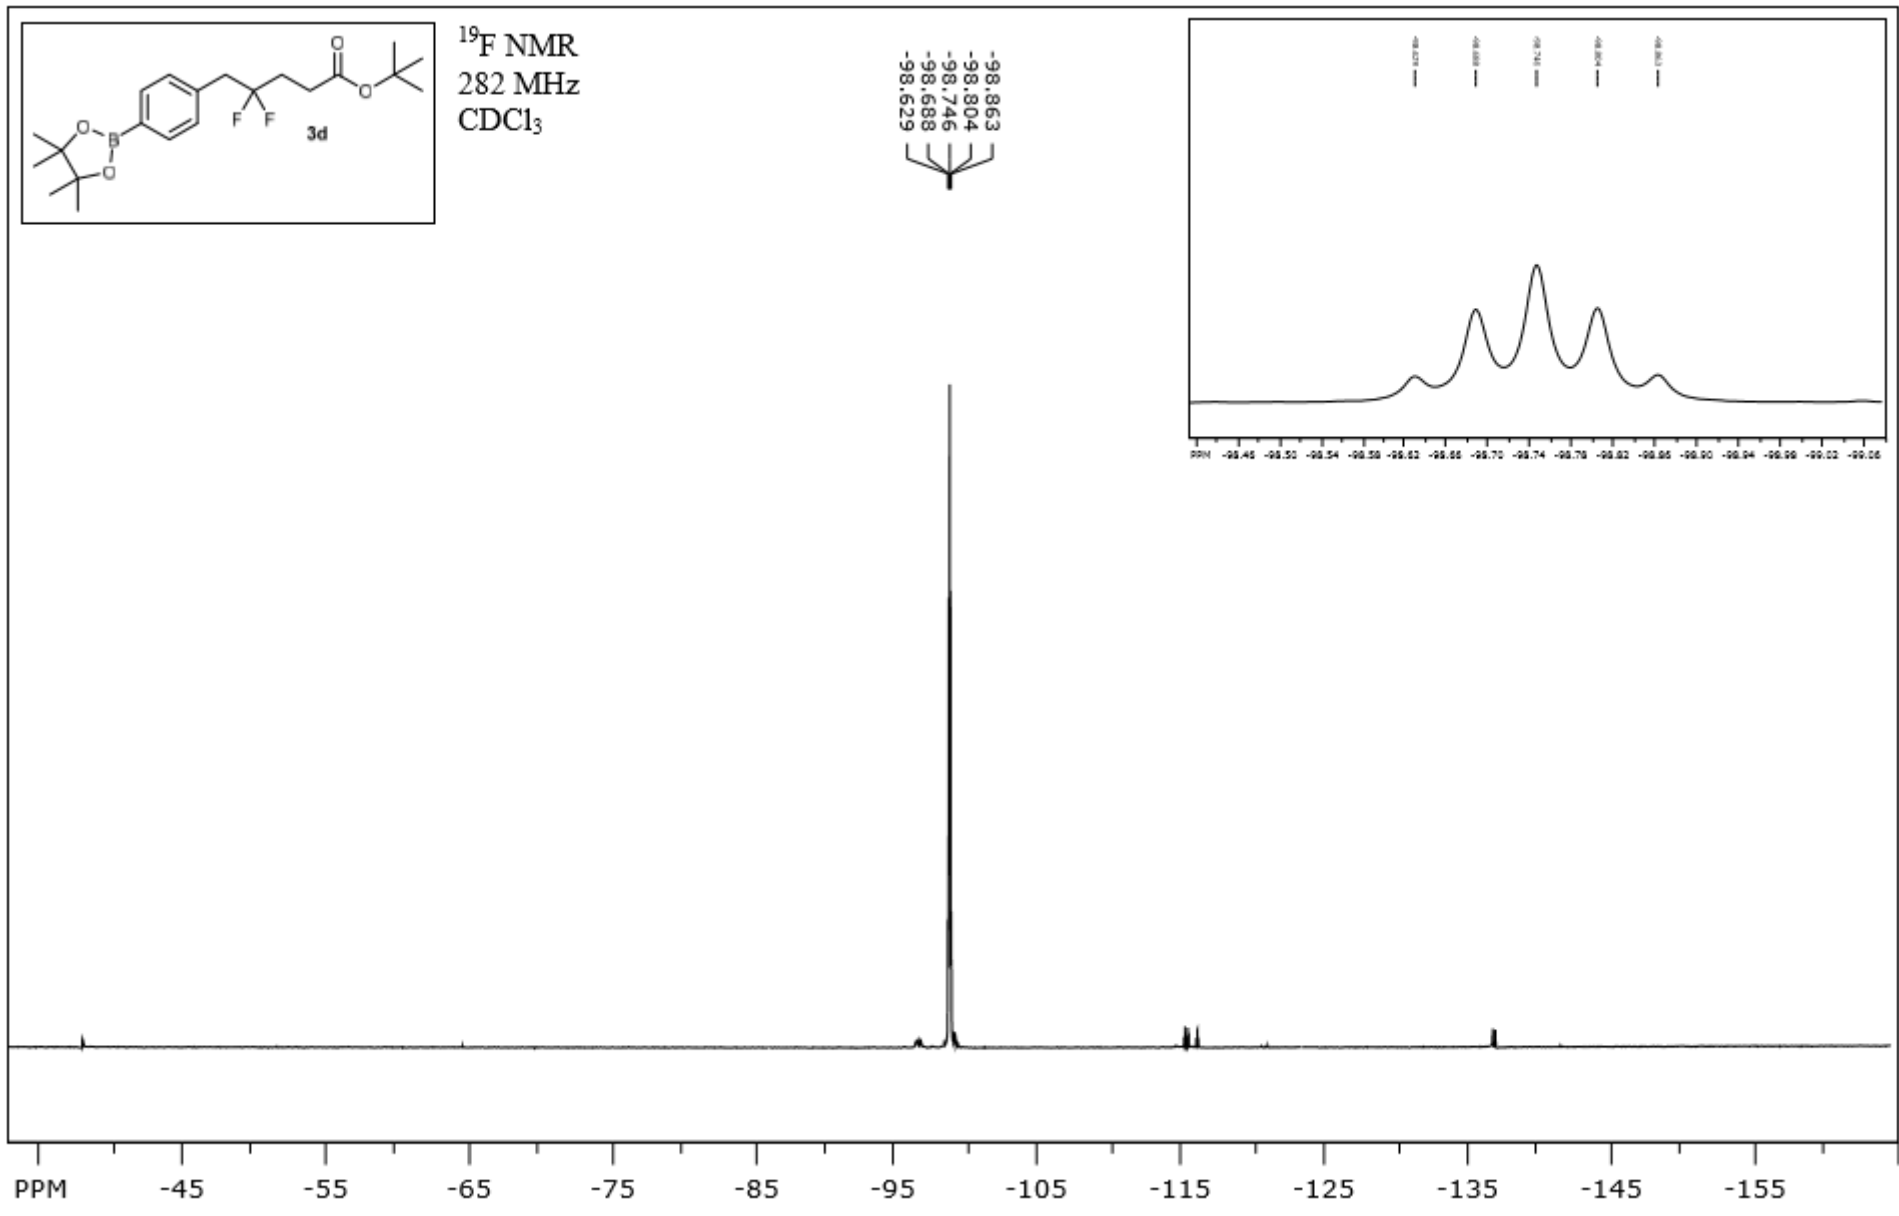

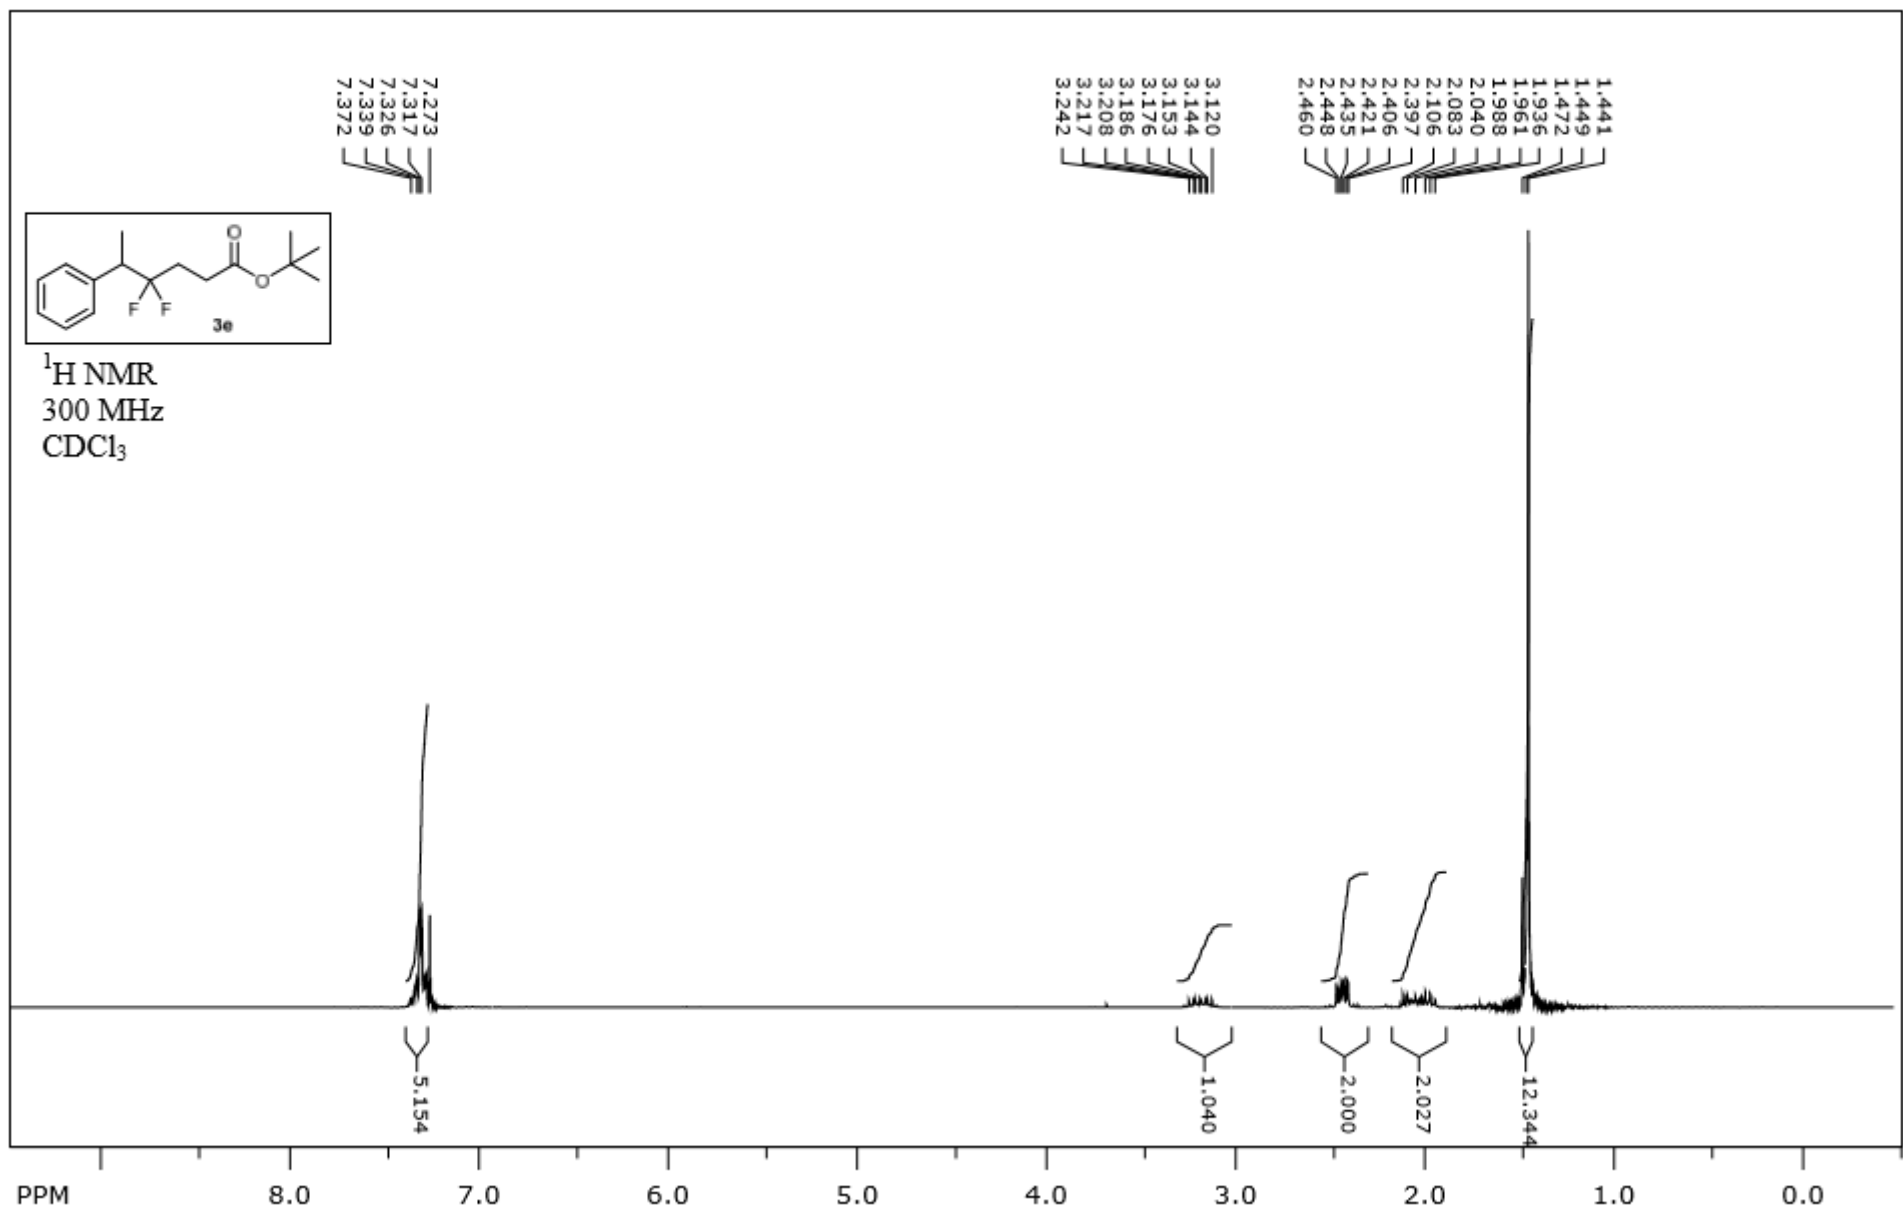

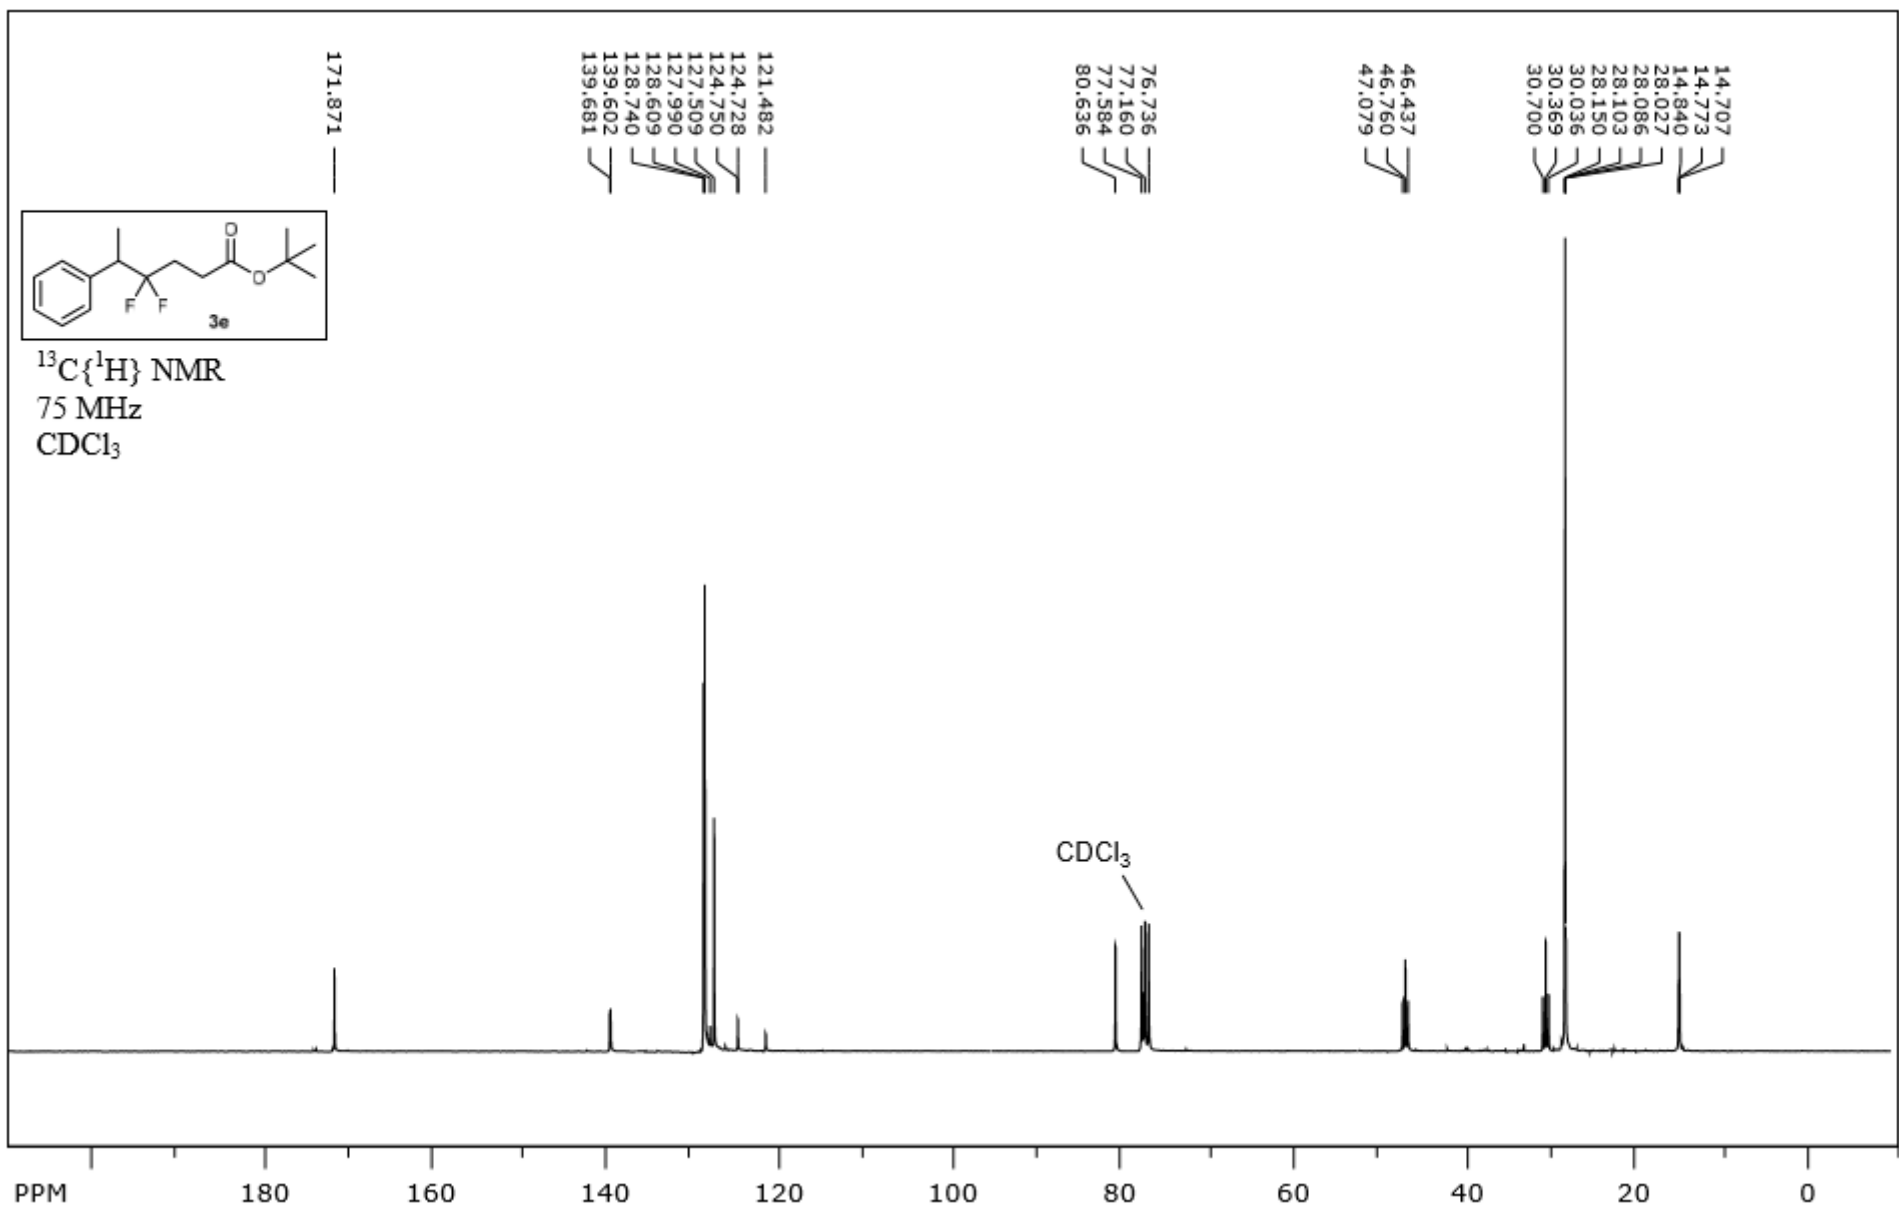

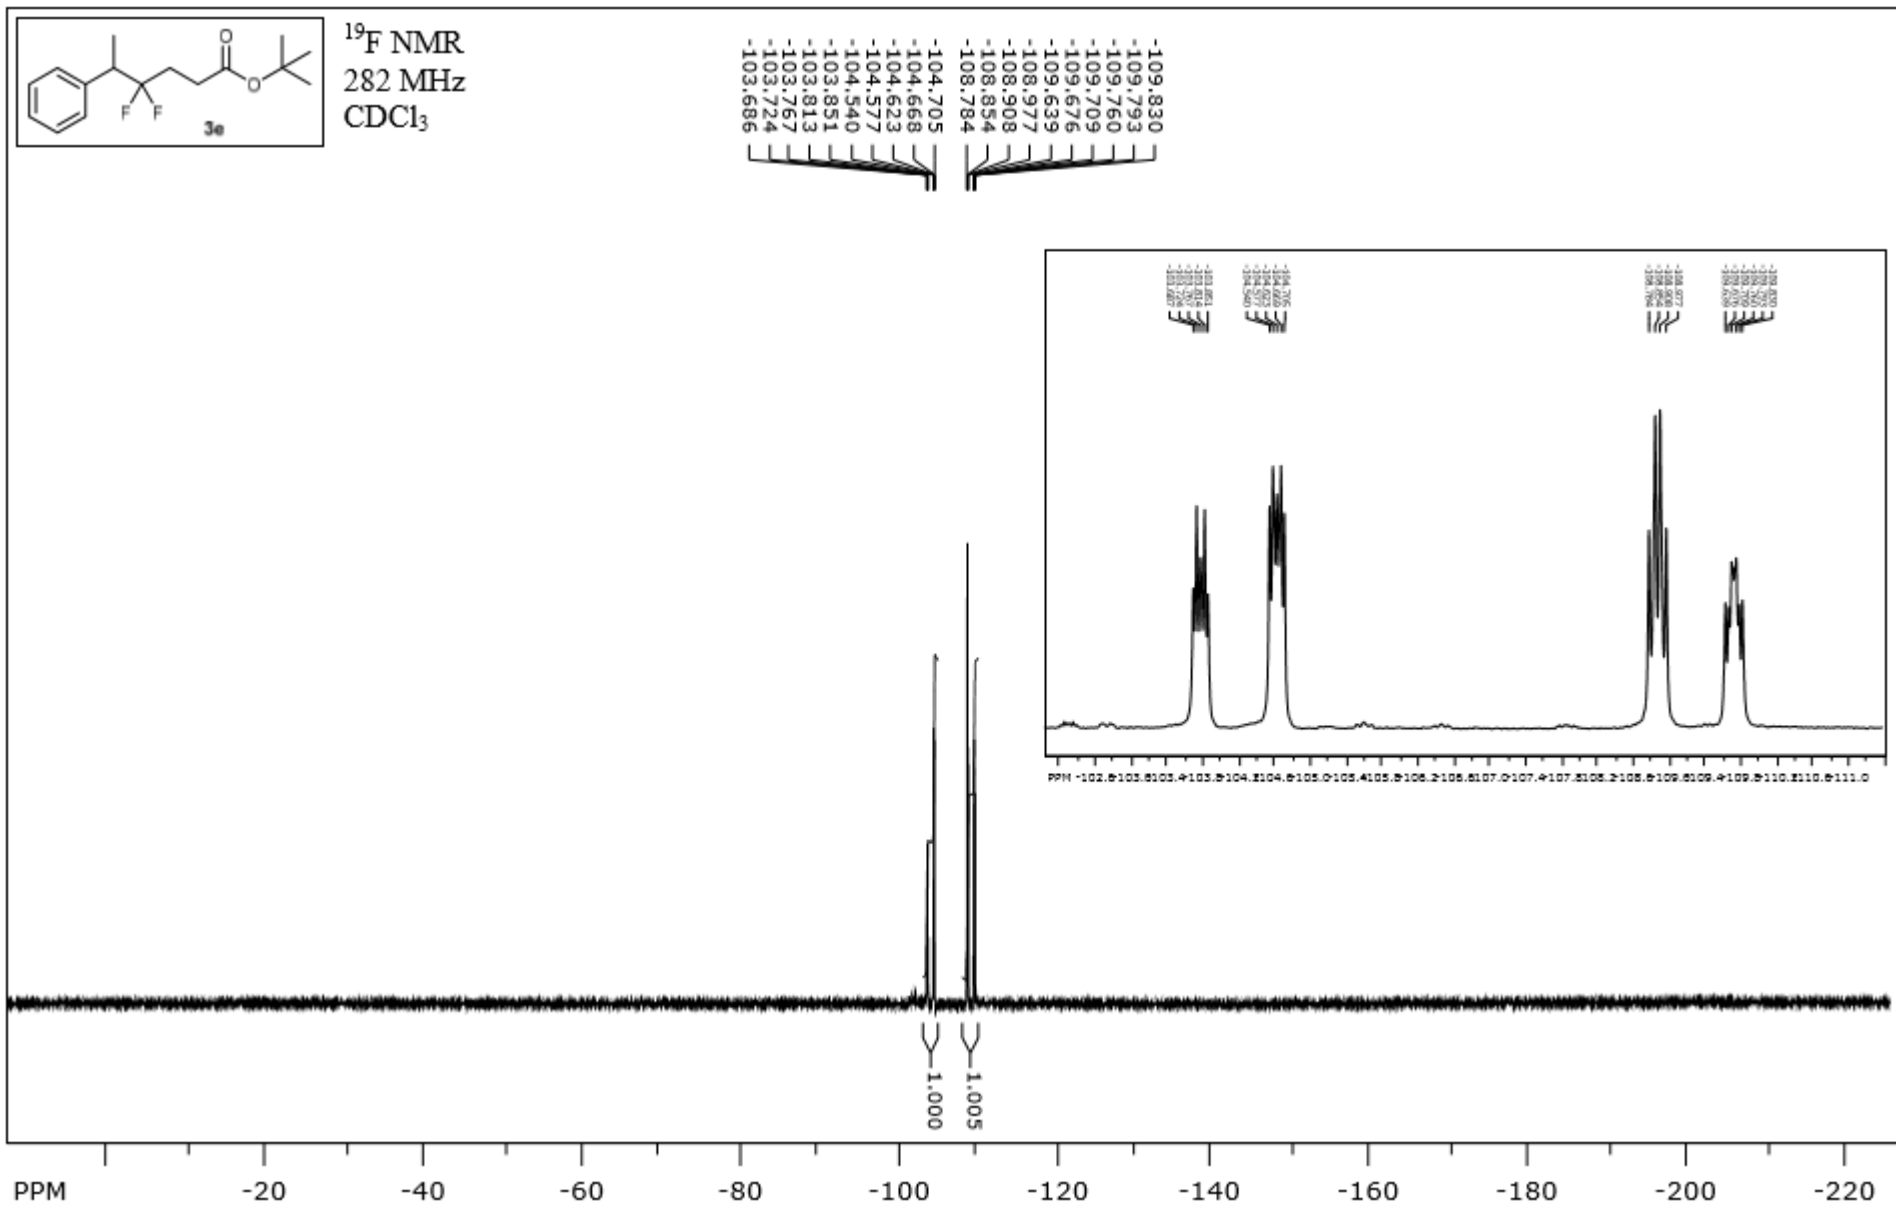



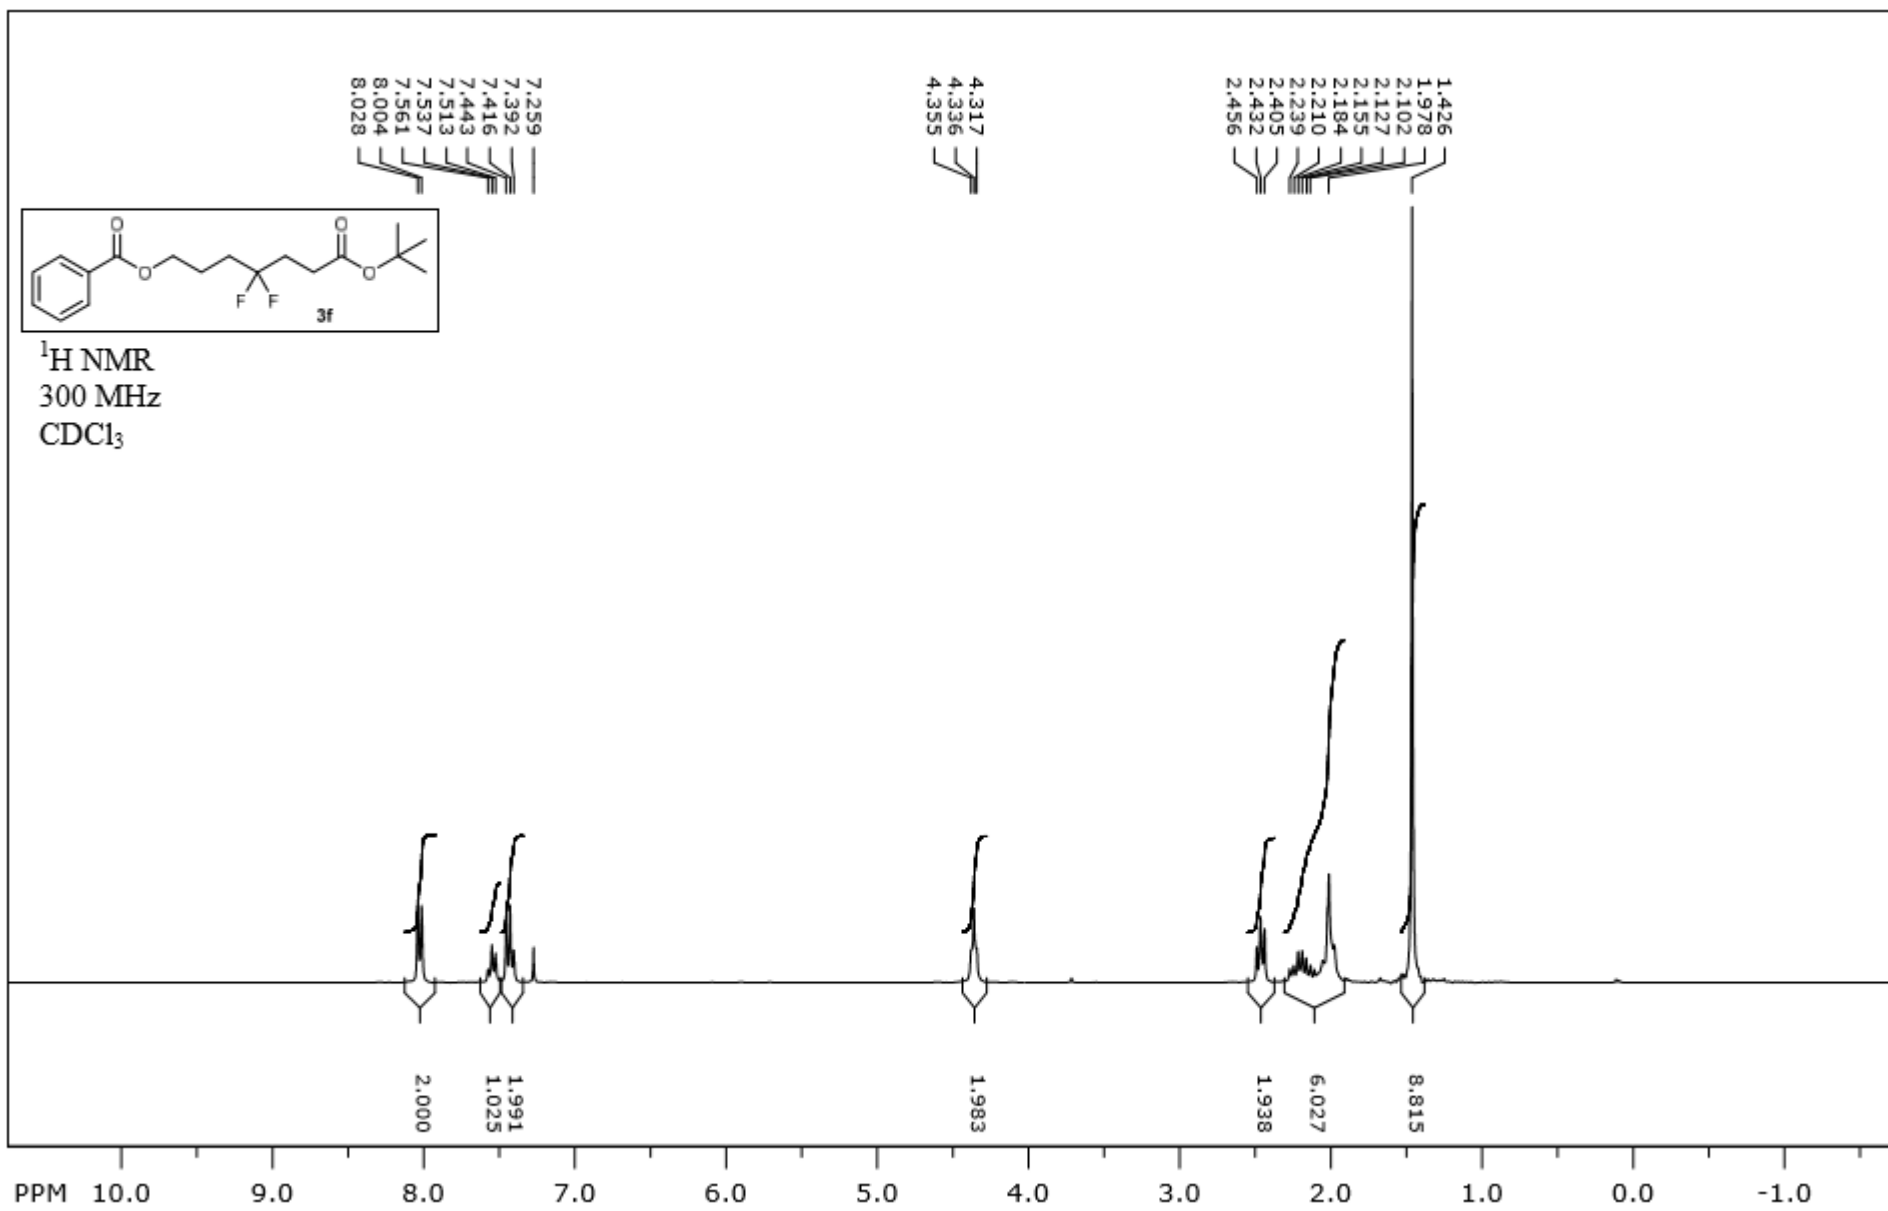

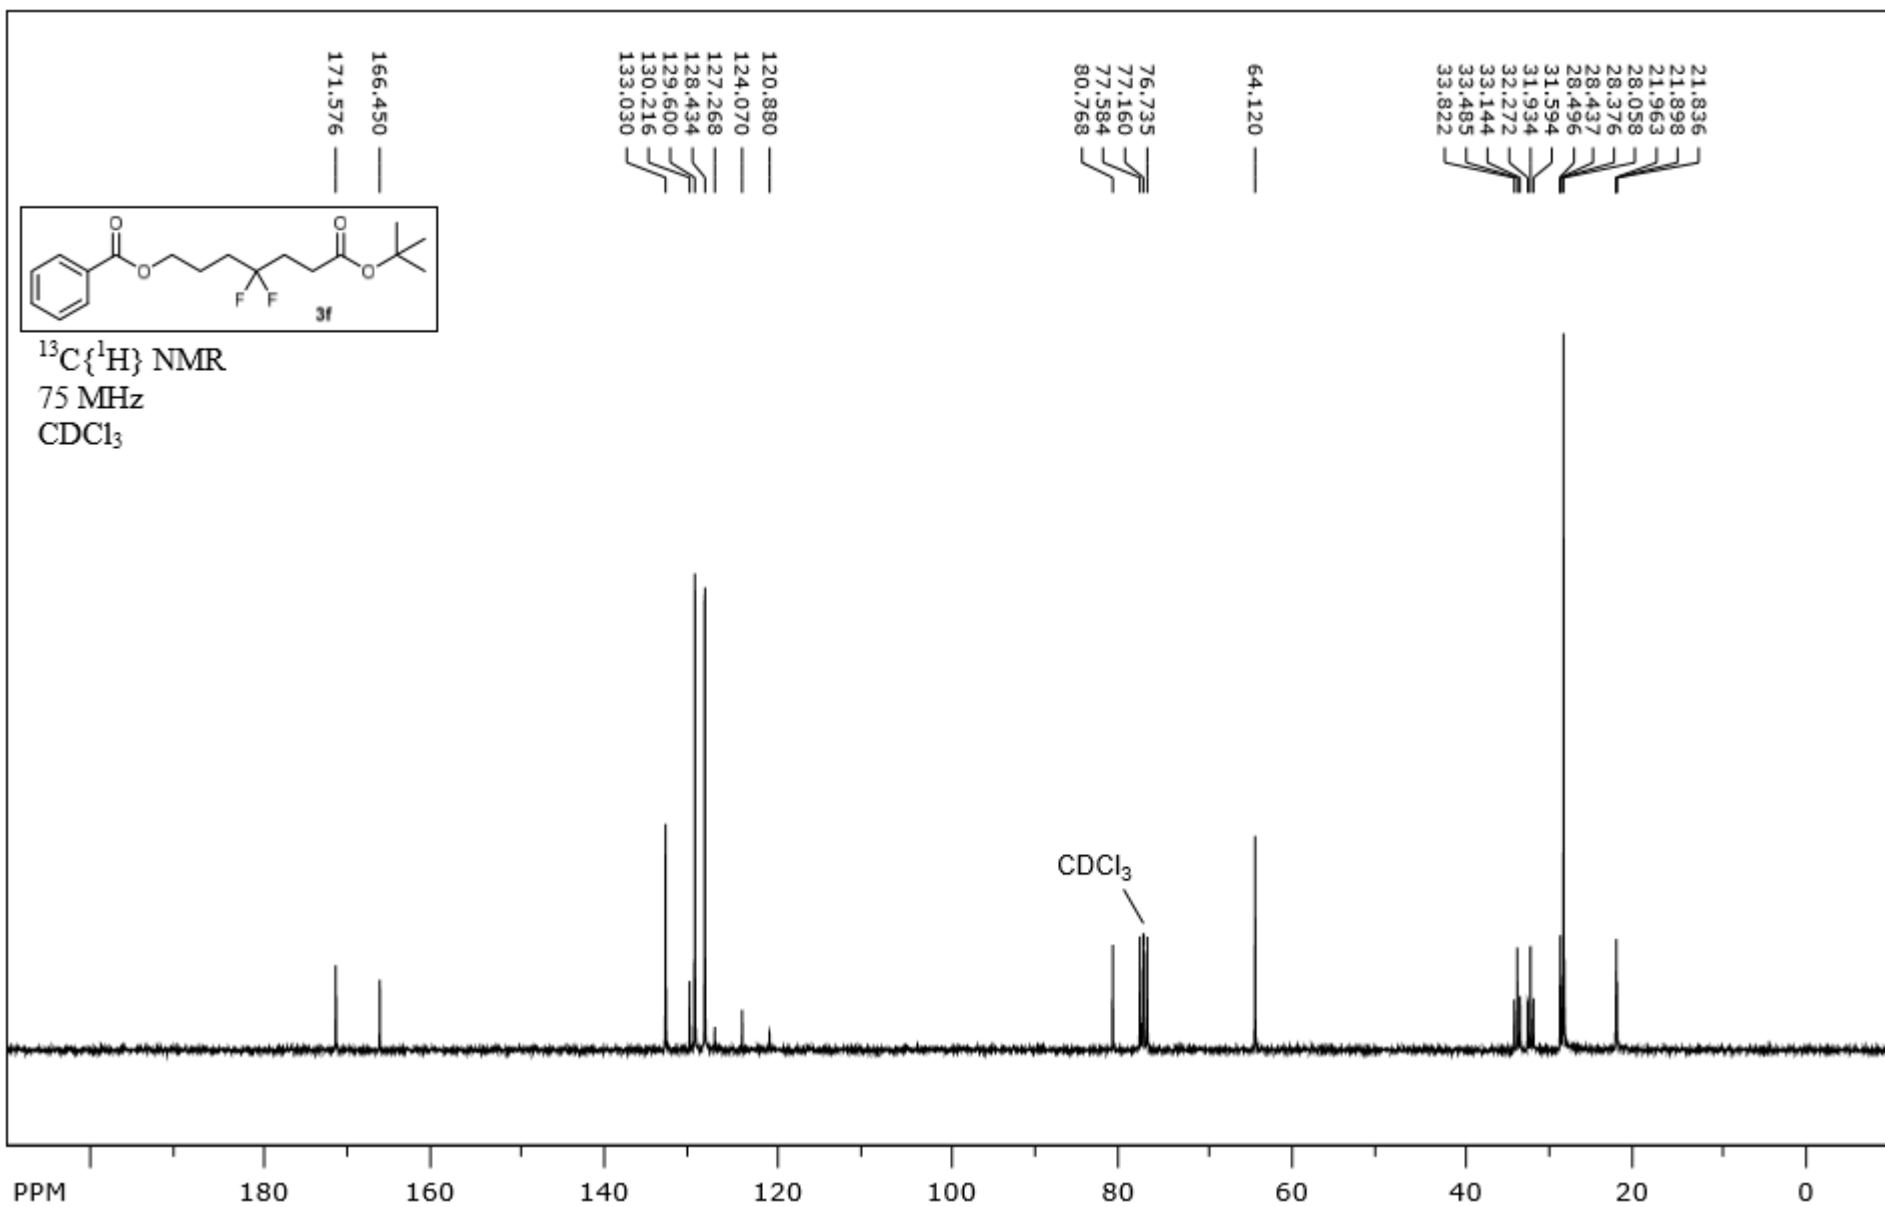

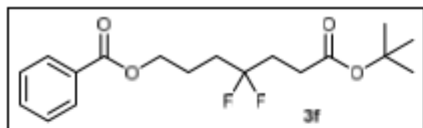

<sup>19</sup>F NMR  
282 MHz  
CDCl<sub>3</sub>

-101.169  
-101.110  
-101.052  
-100.993  
-100.934

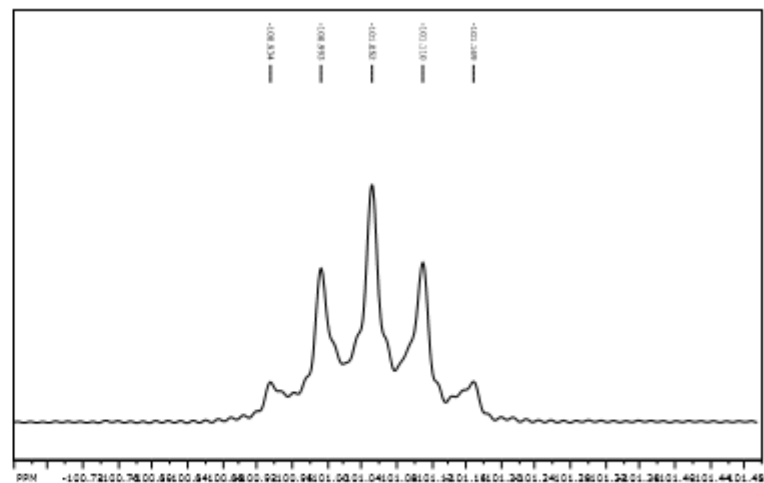

PPM -55 -65 -75 -85 -95 -105 -115 -125 -135 -145 -155

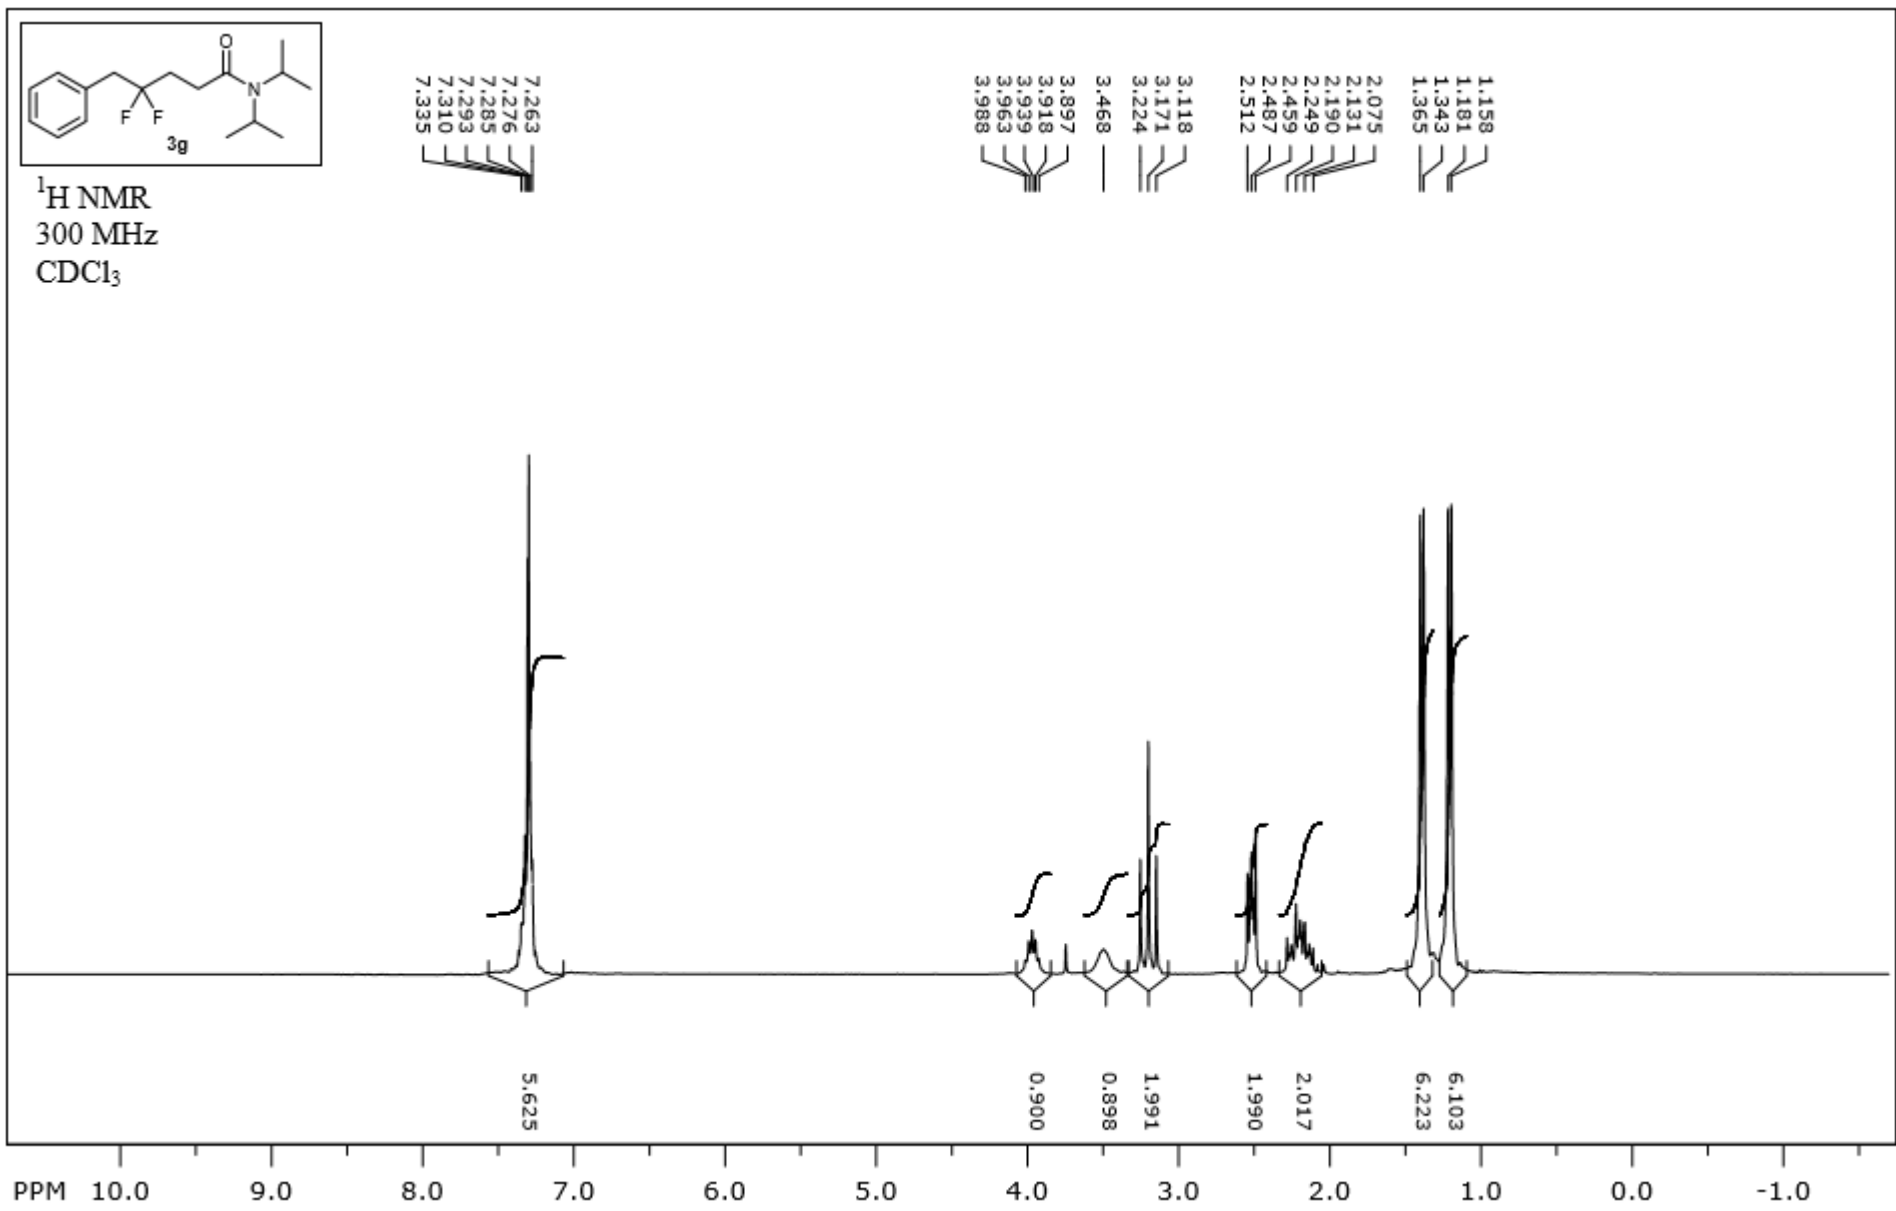

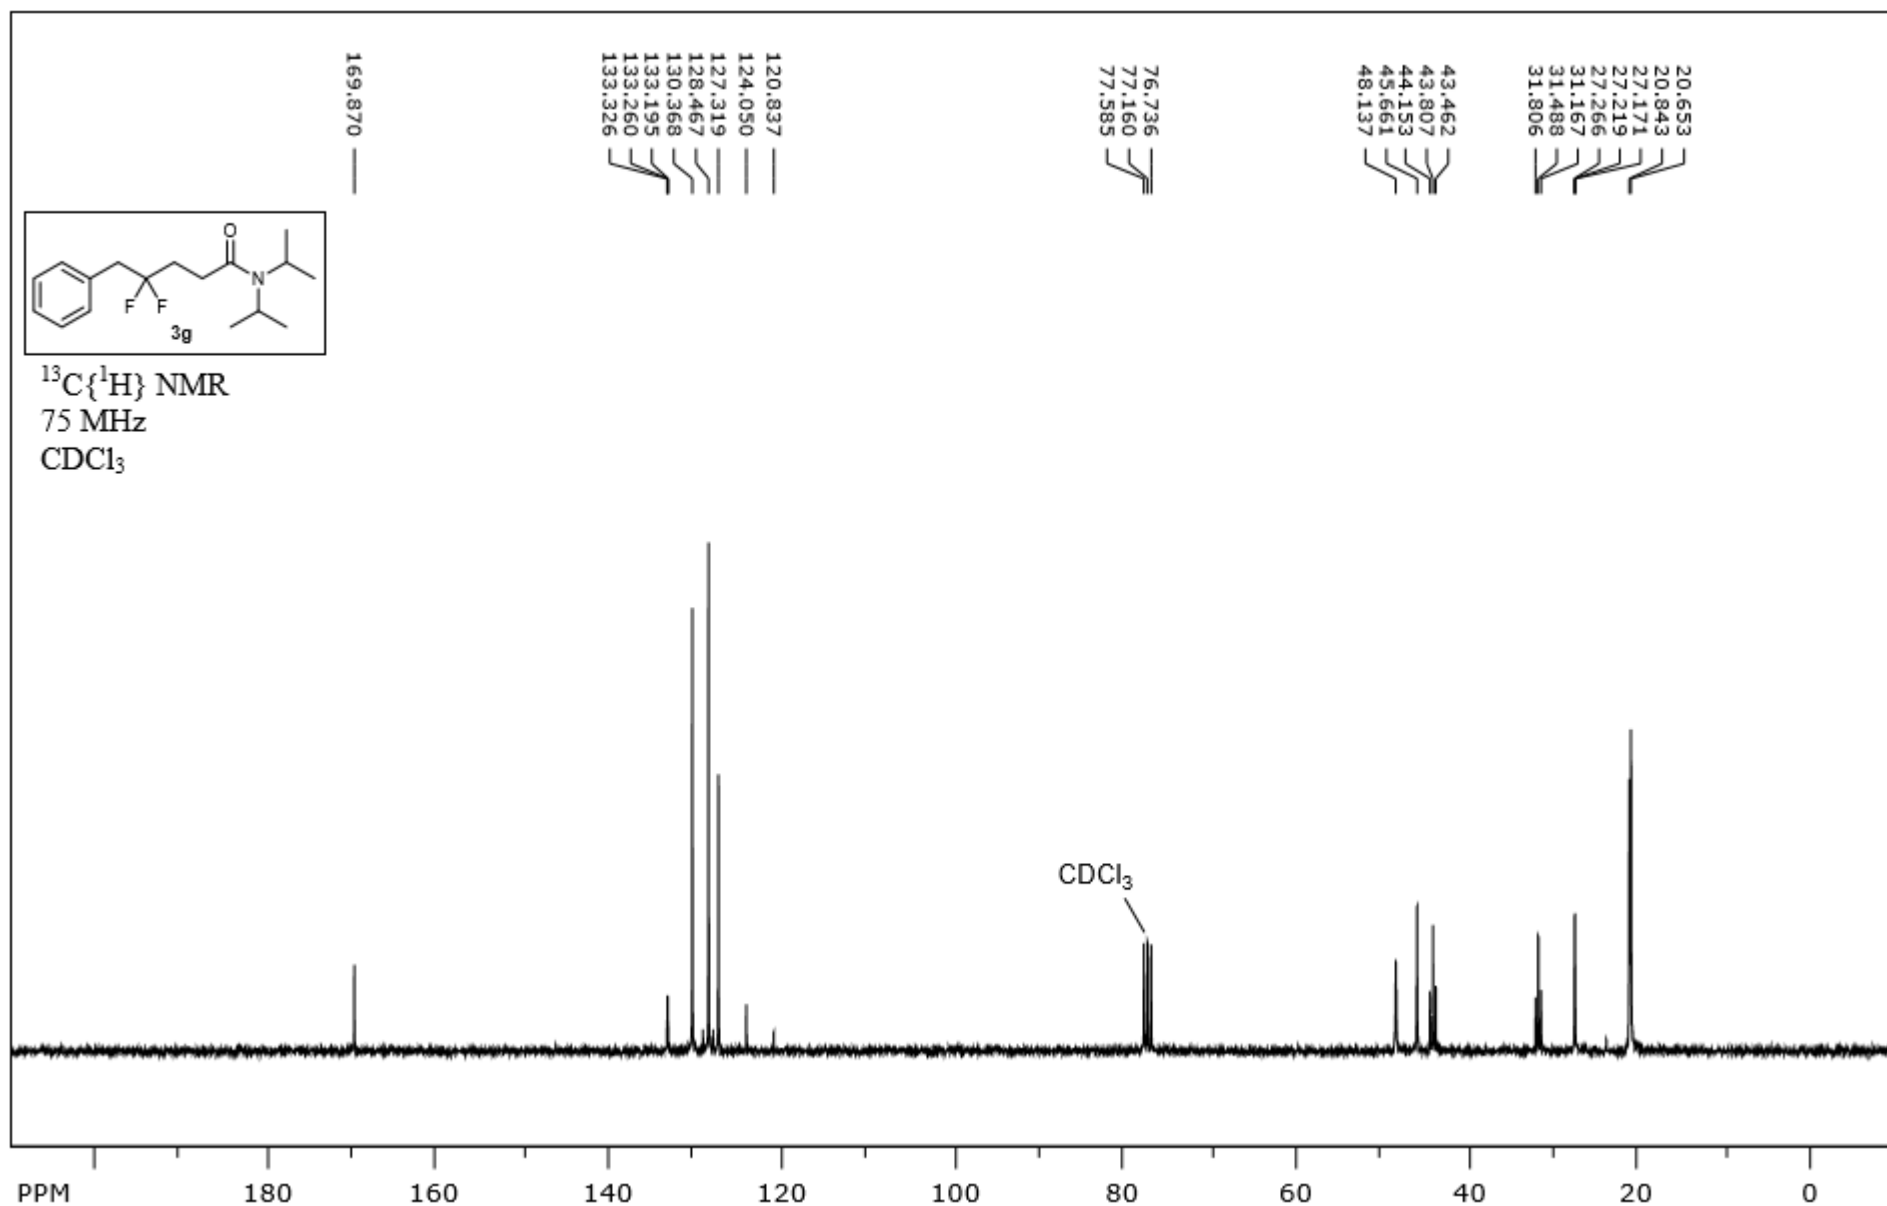

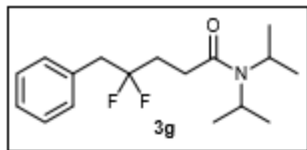

<sup>19</sup>F NMR  
282 MHz  
CDCl<sub>3</sub>

-99.095  
-99.035  
-98.975  
-98.916  
-98.856

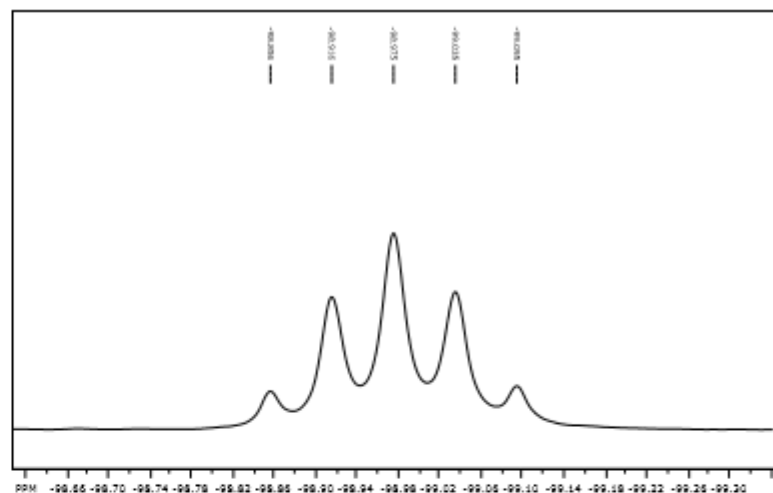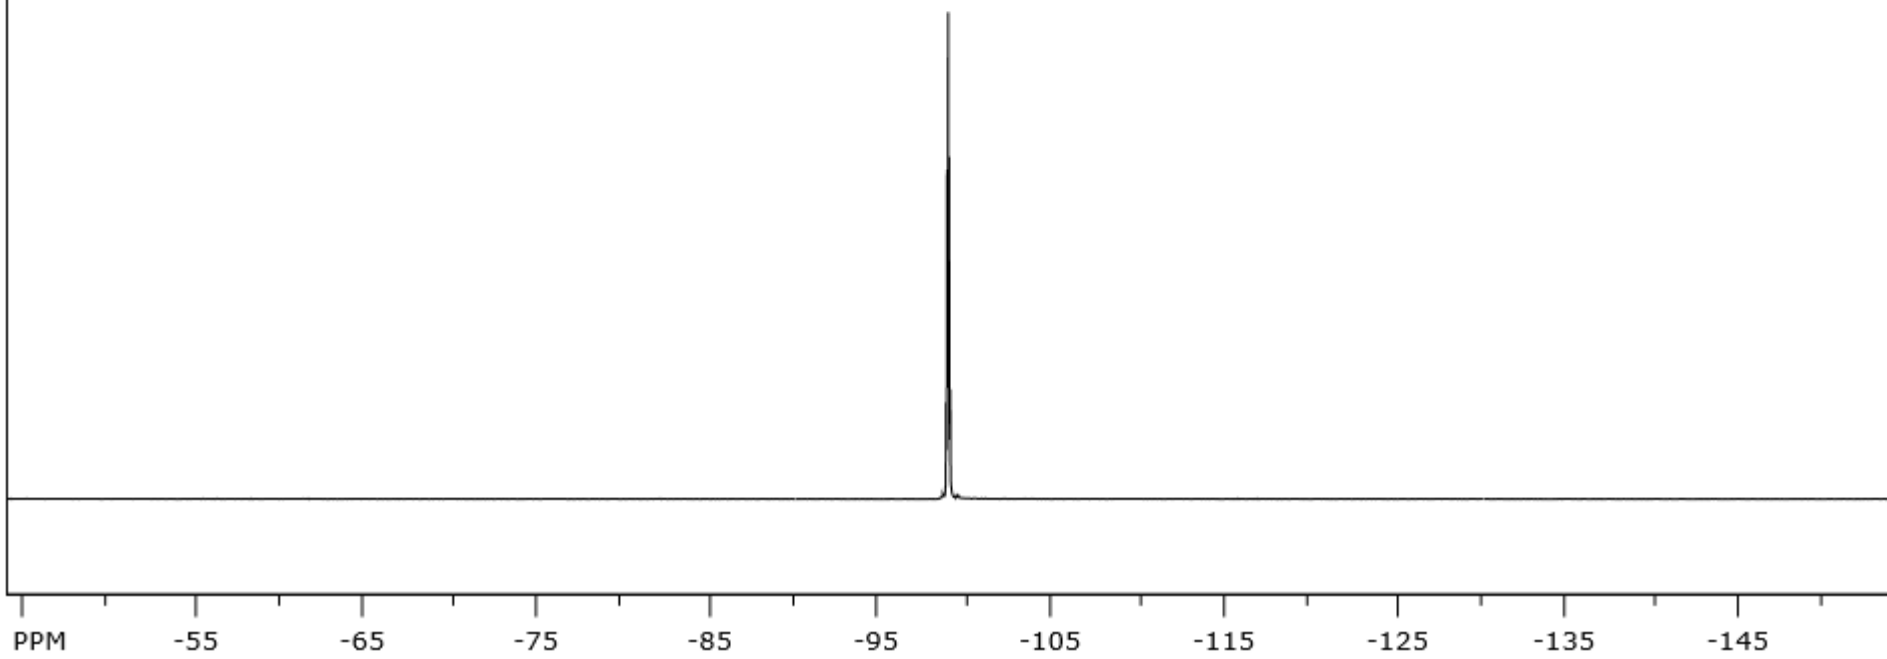

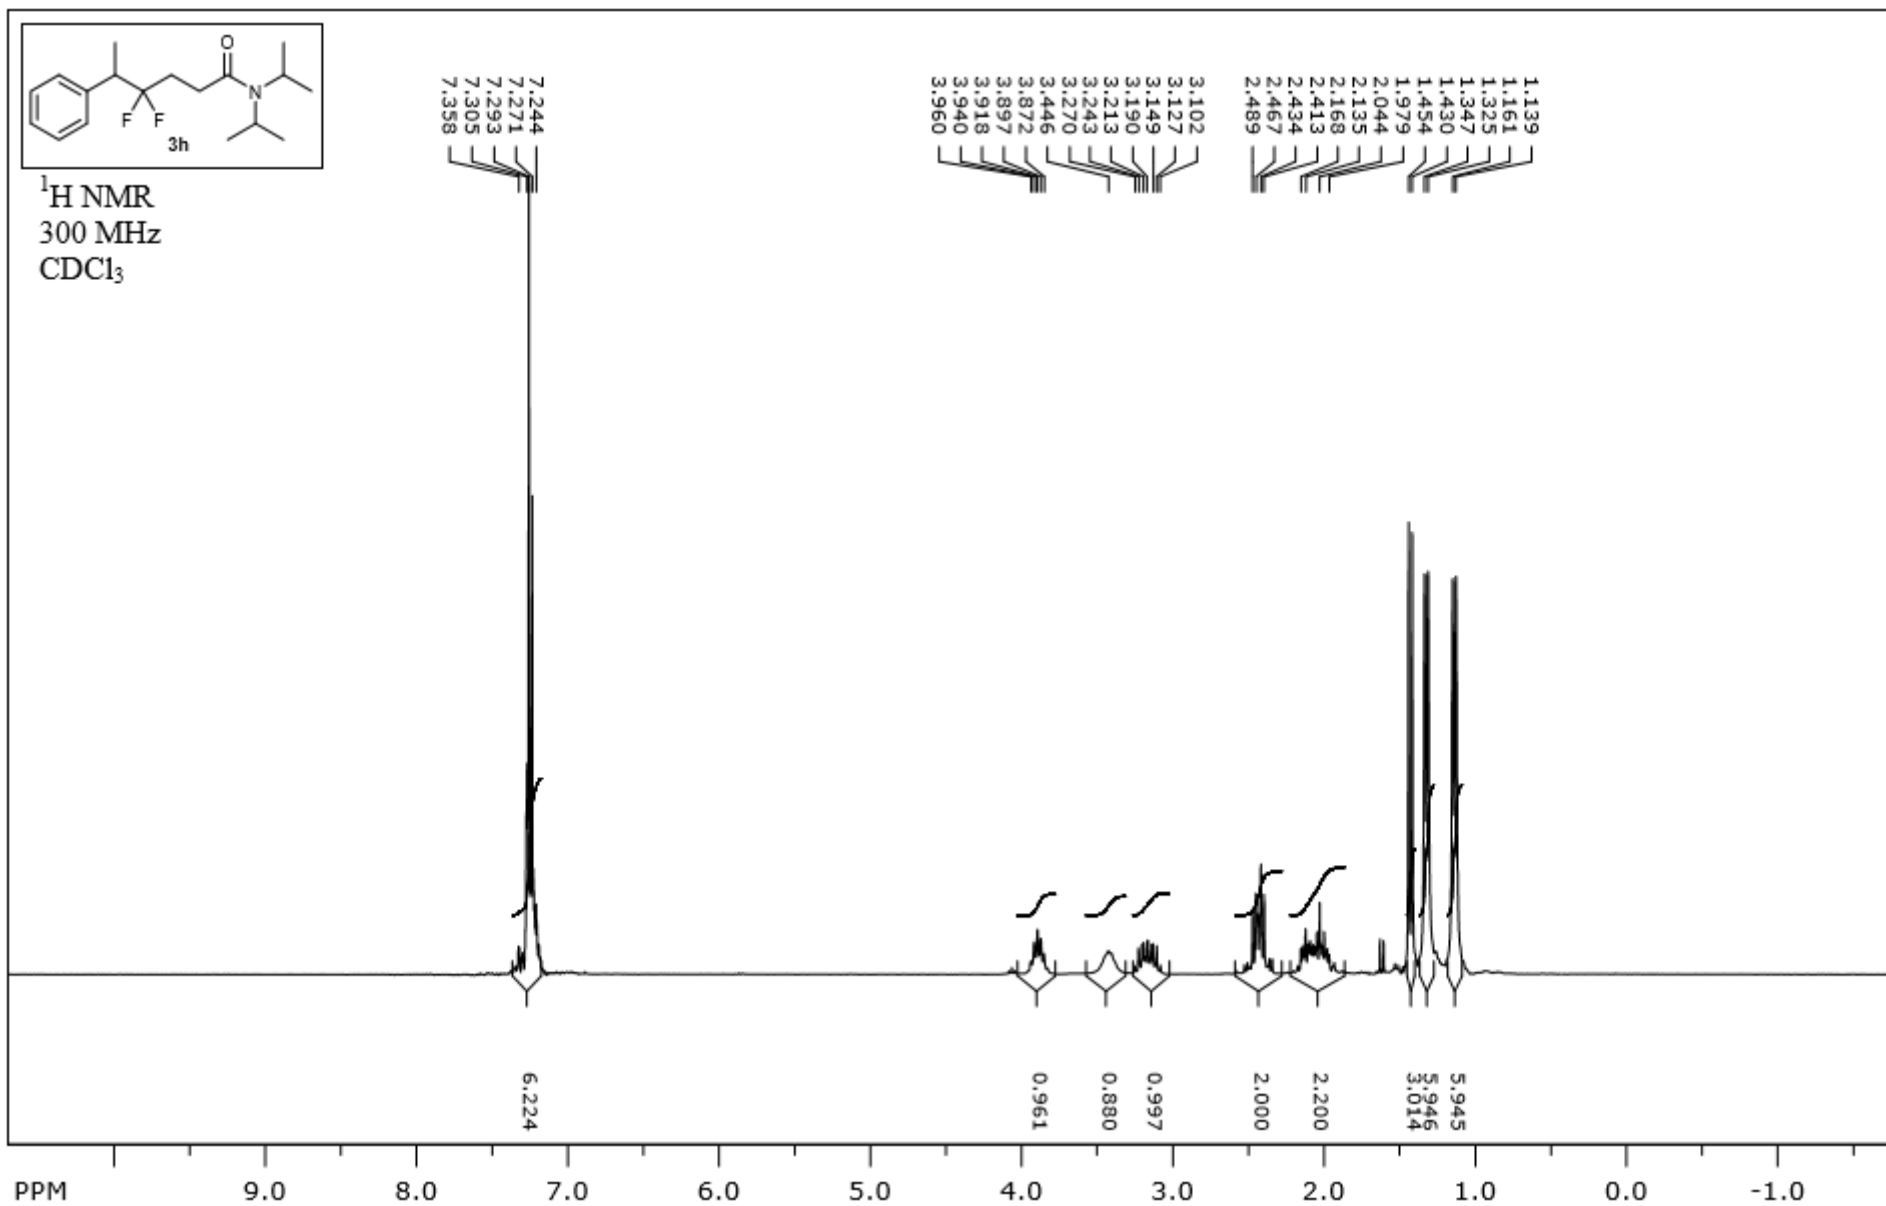

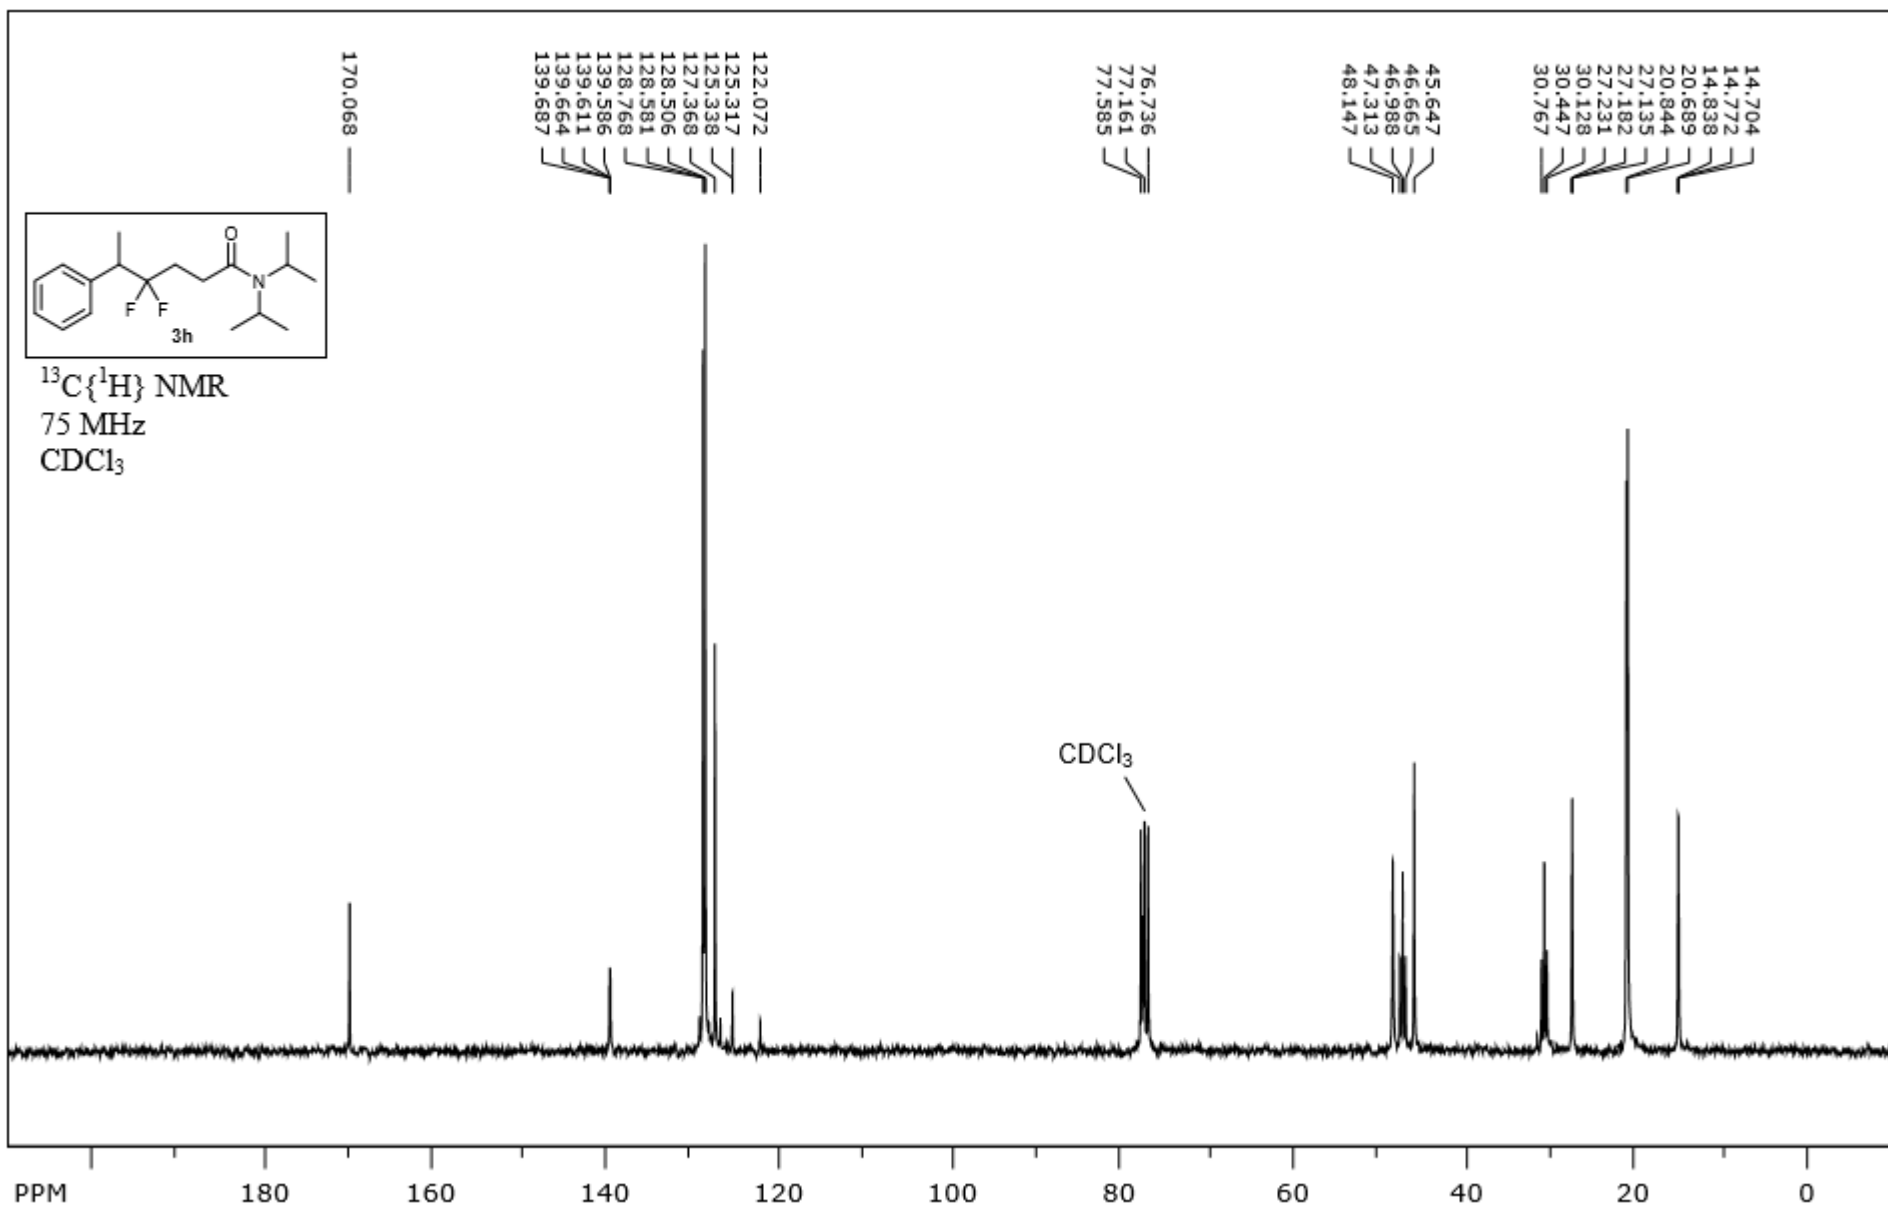



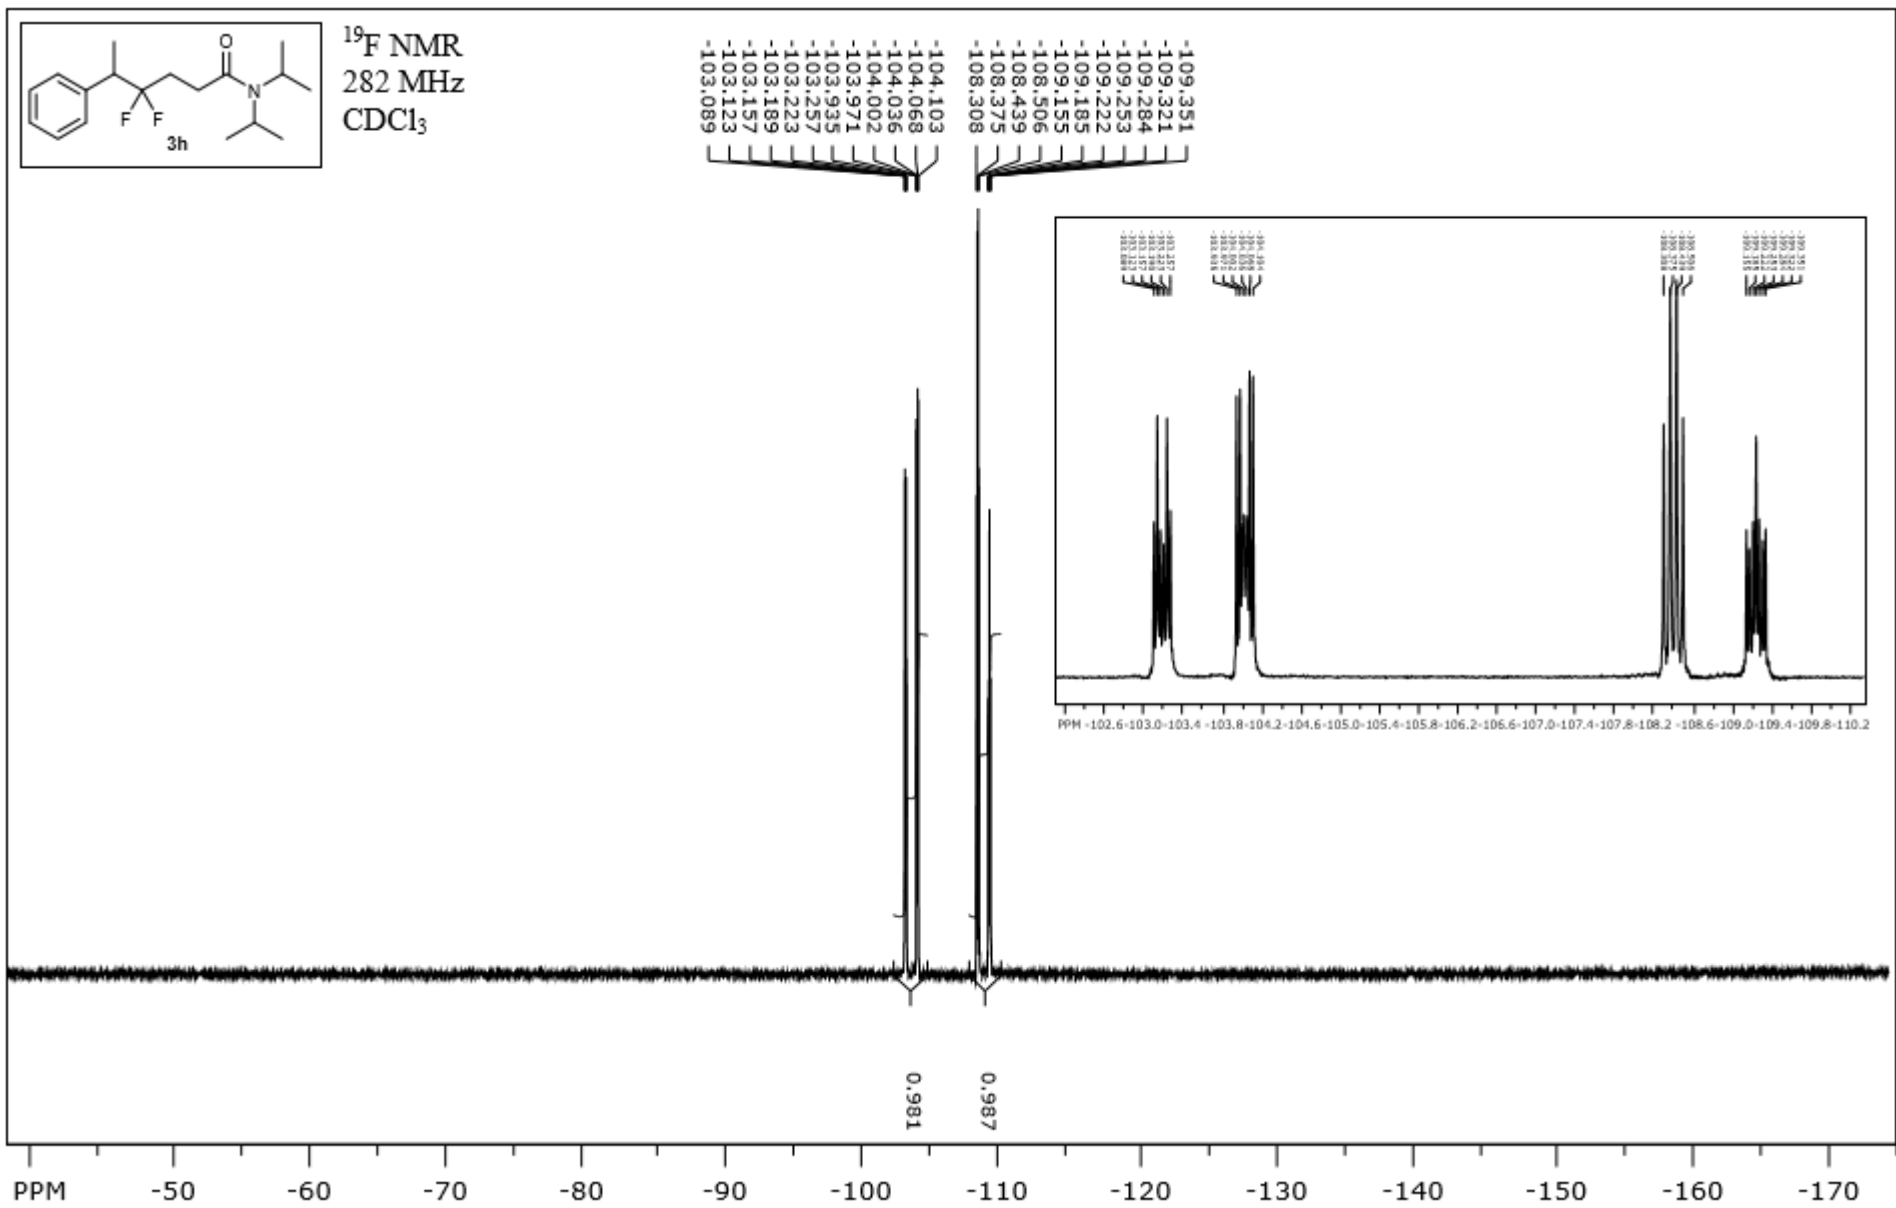

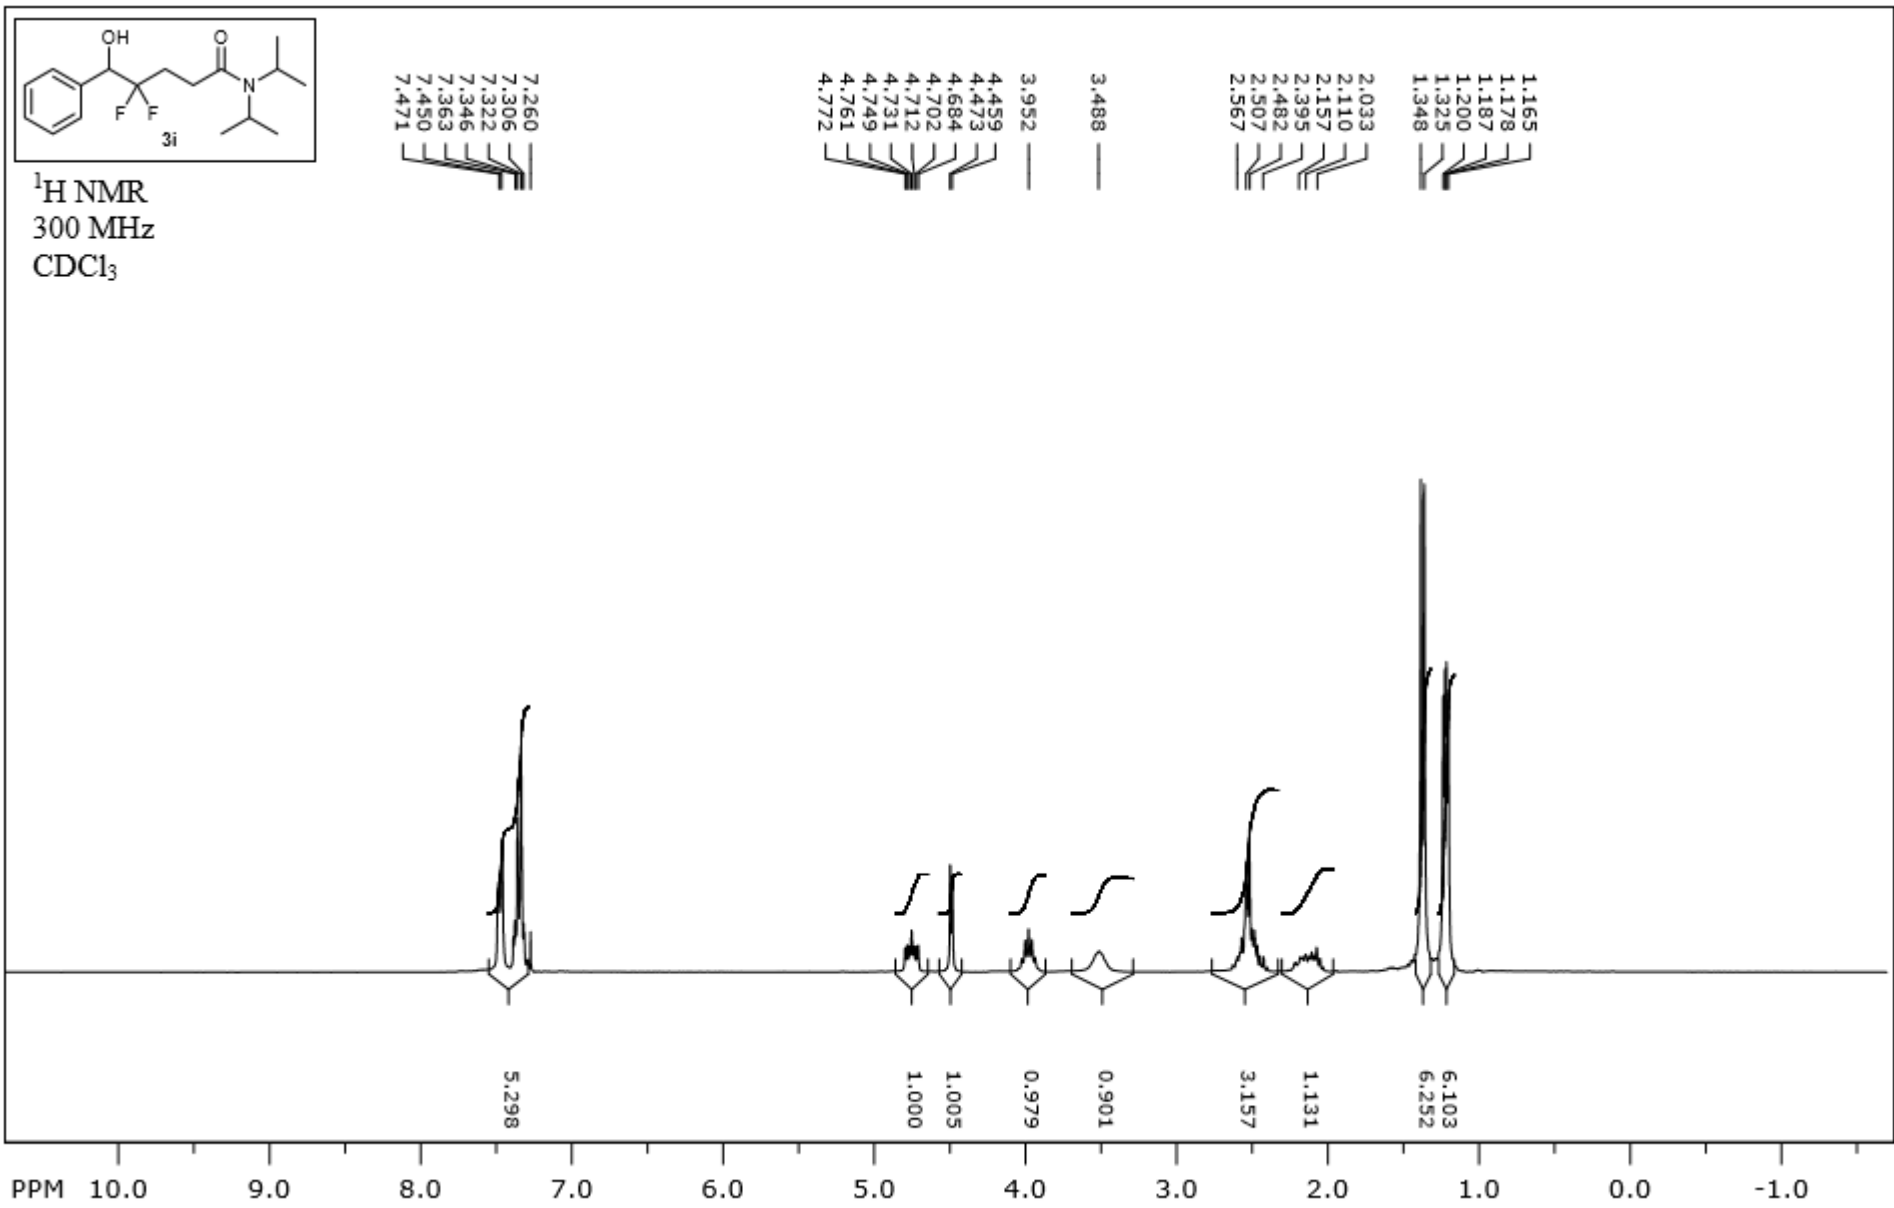

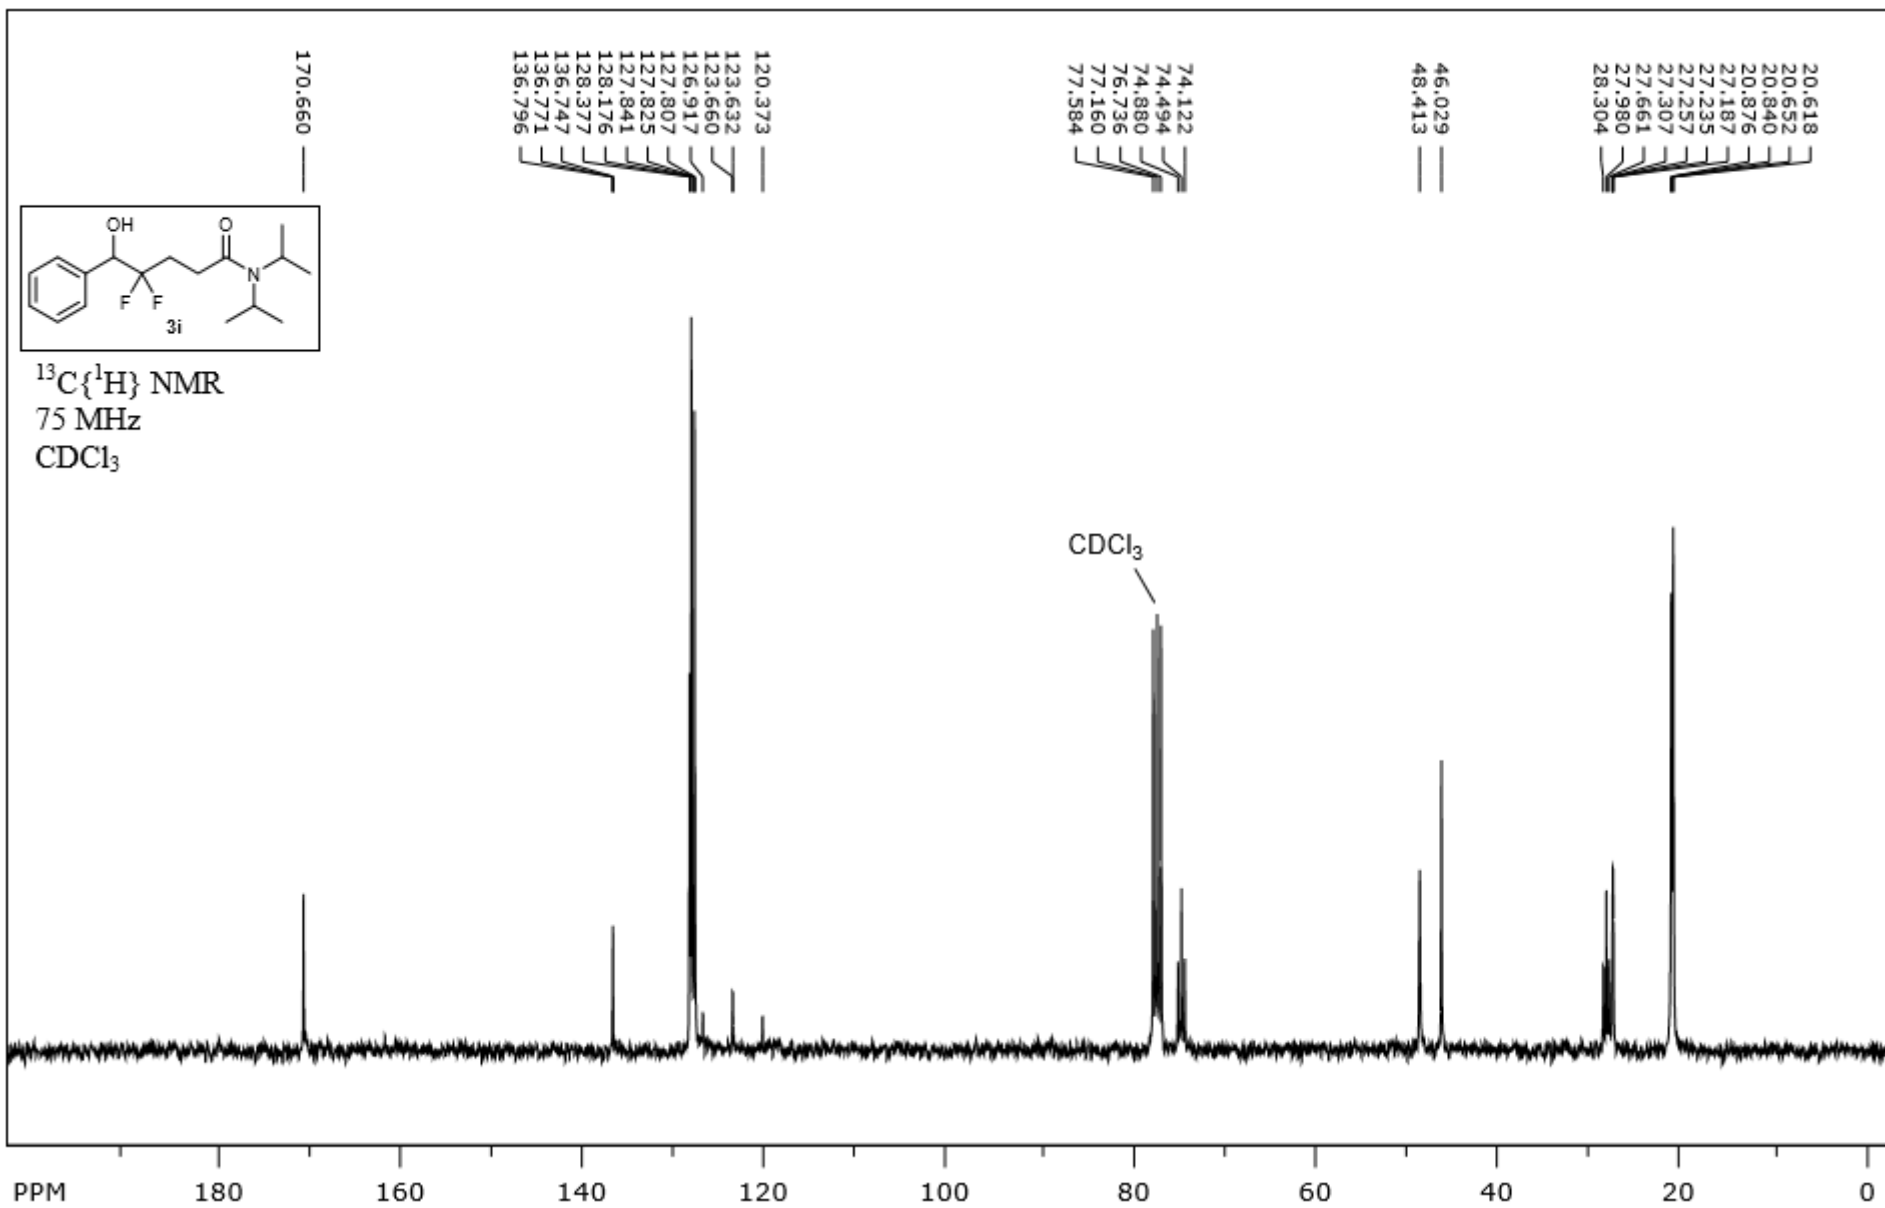

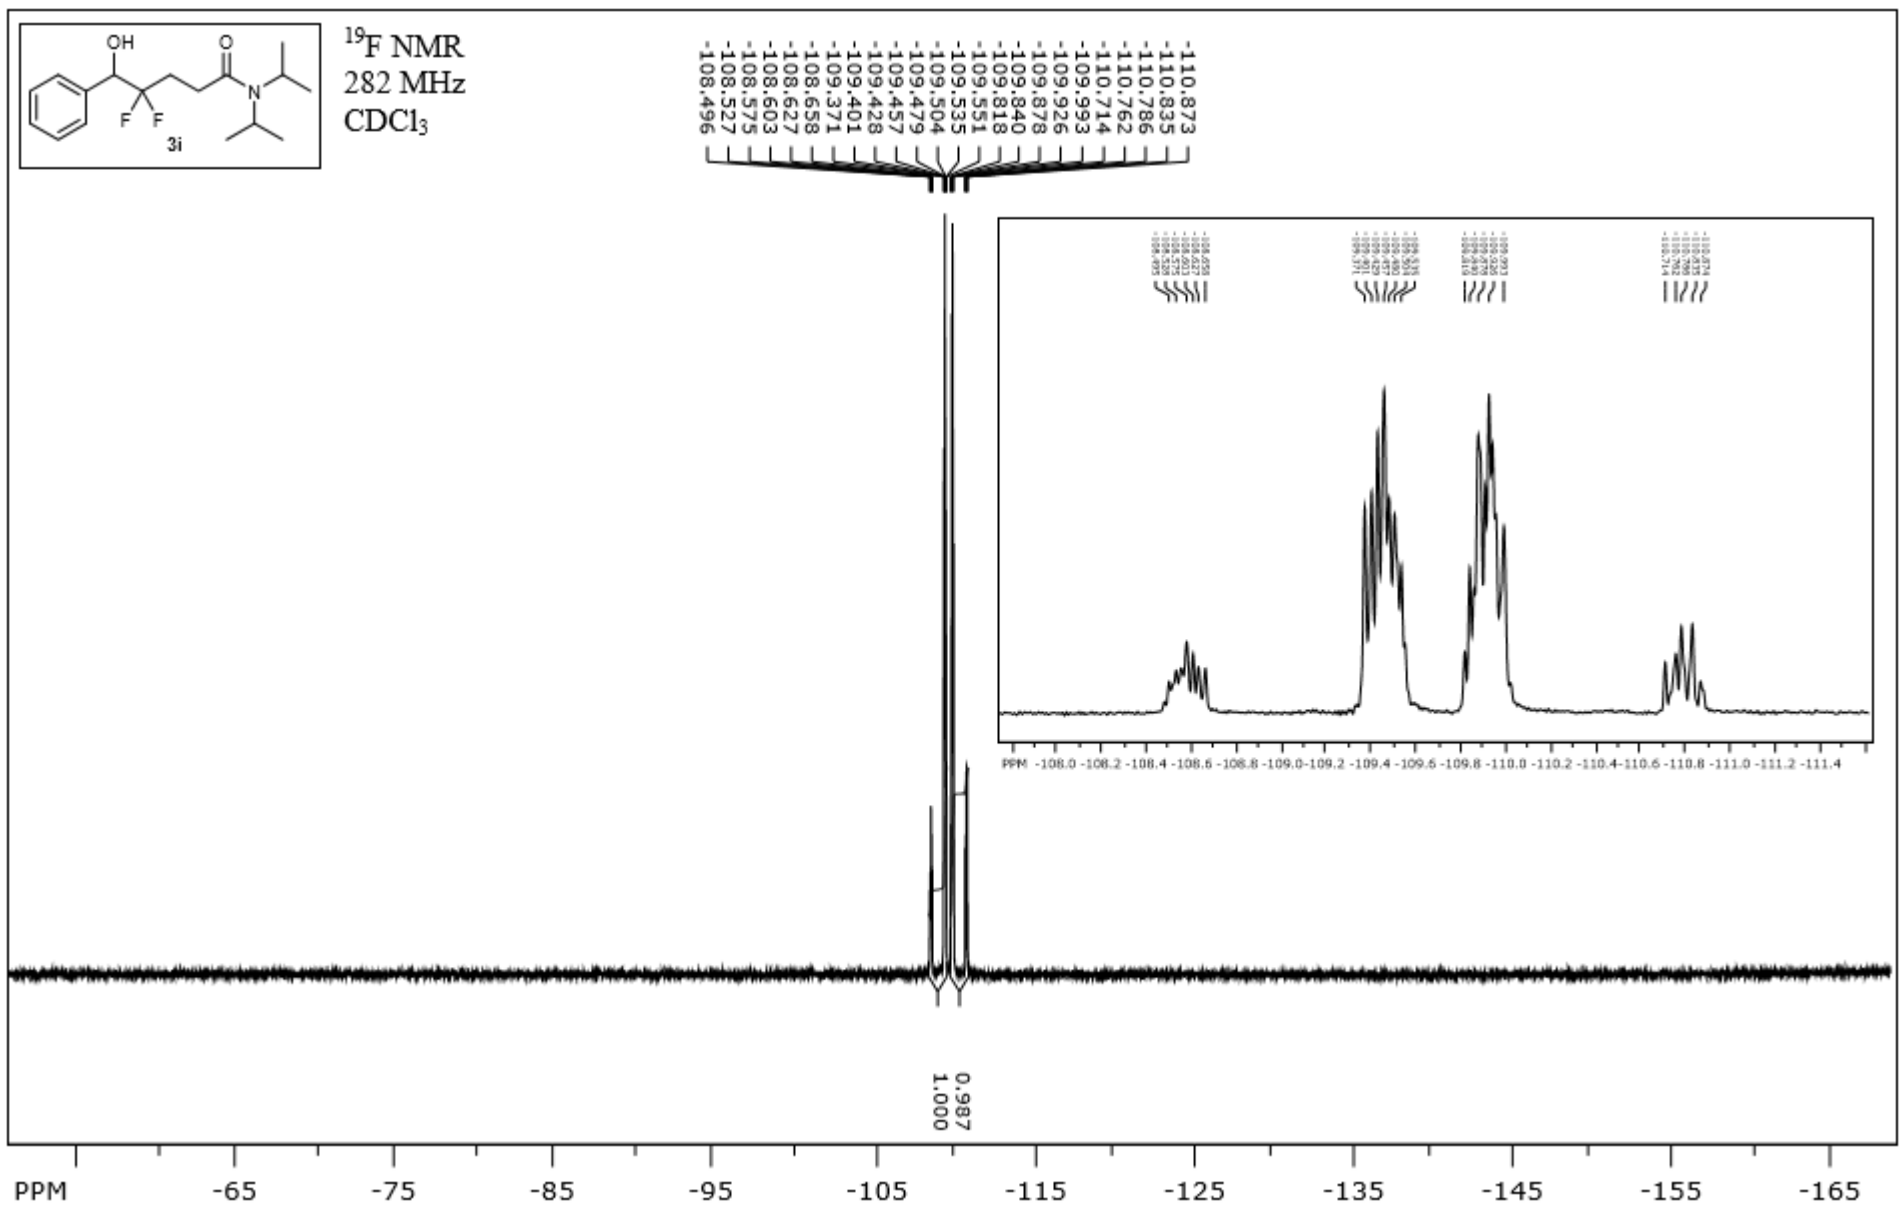

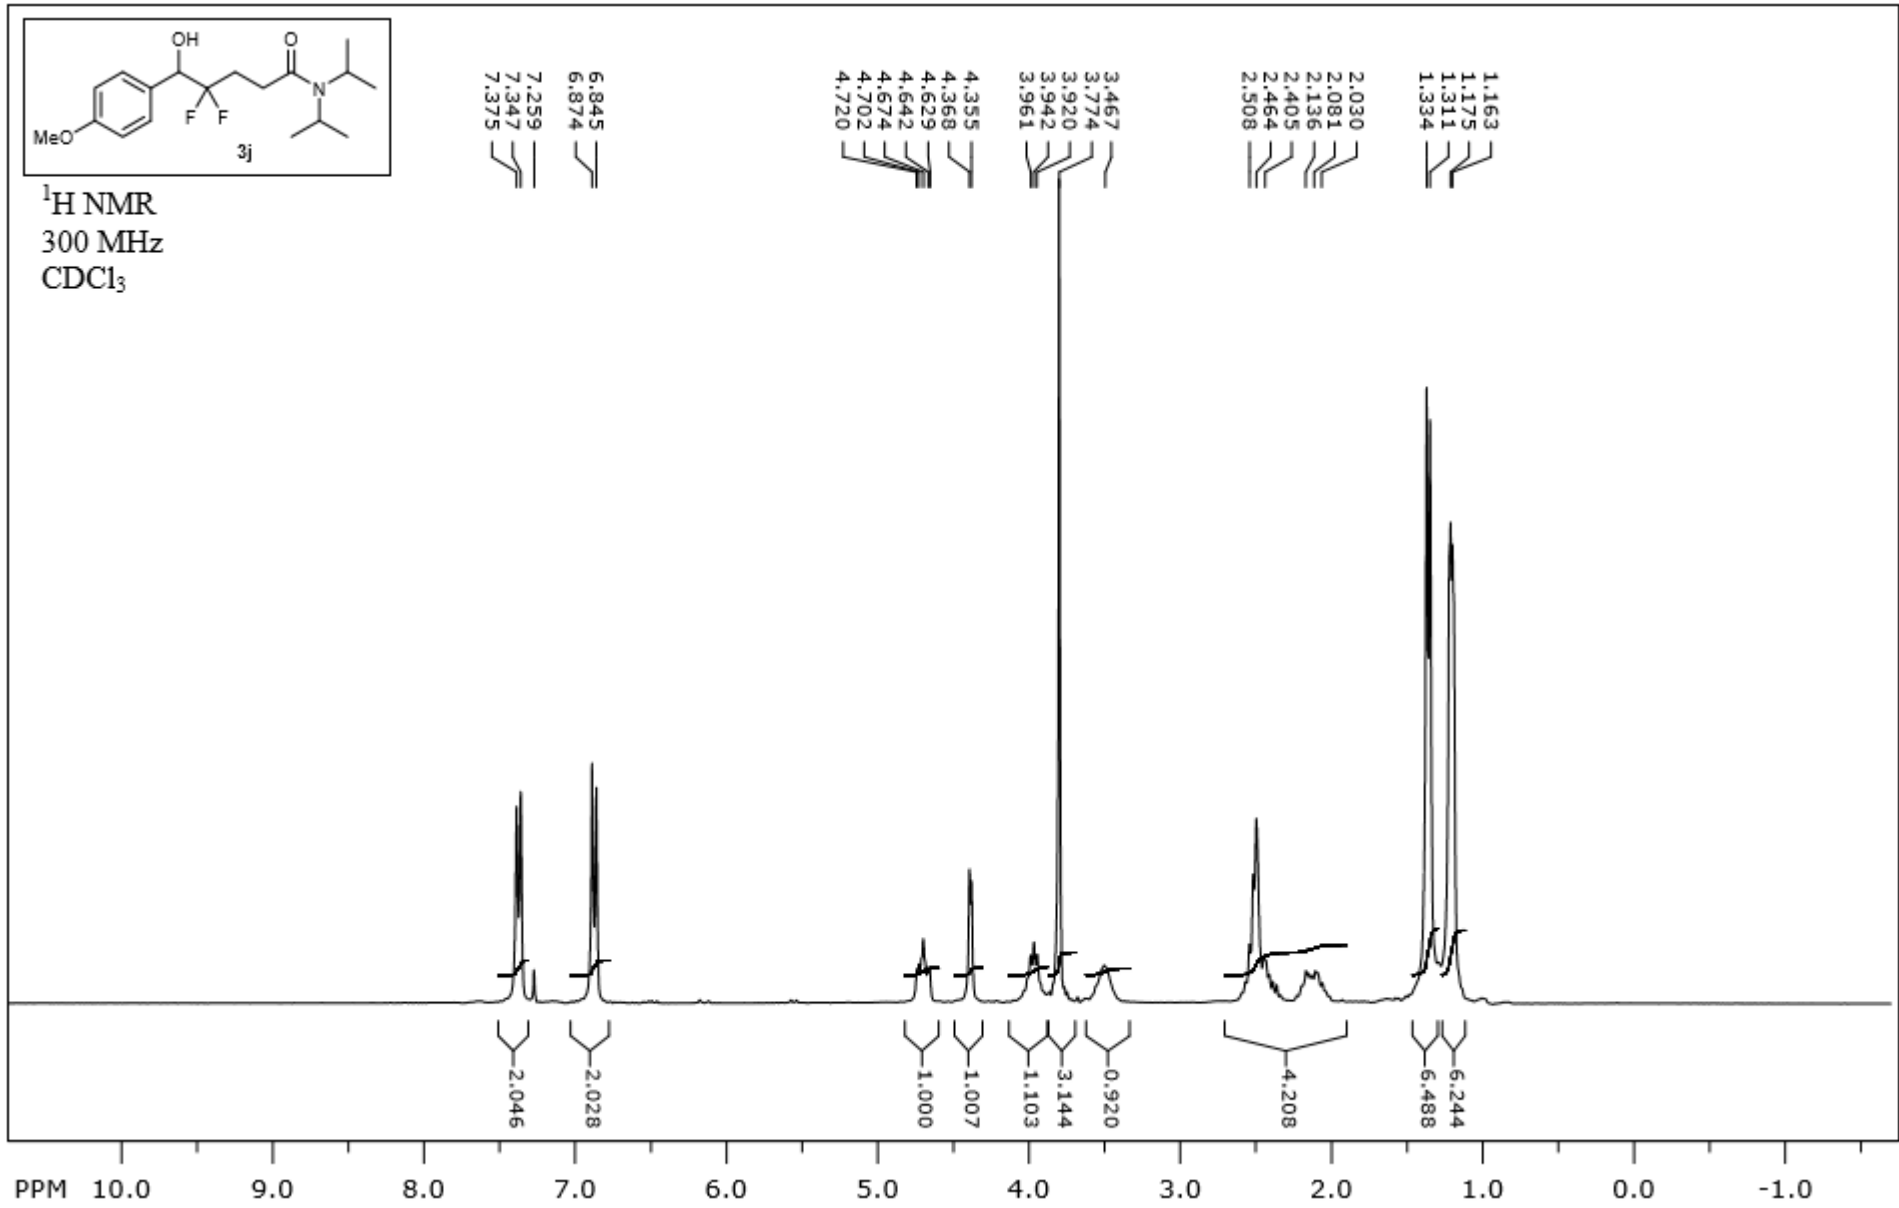

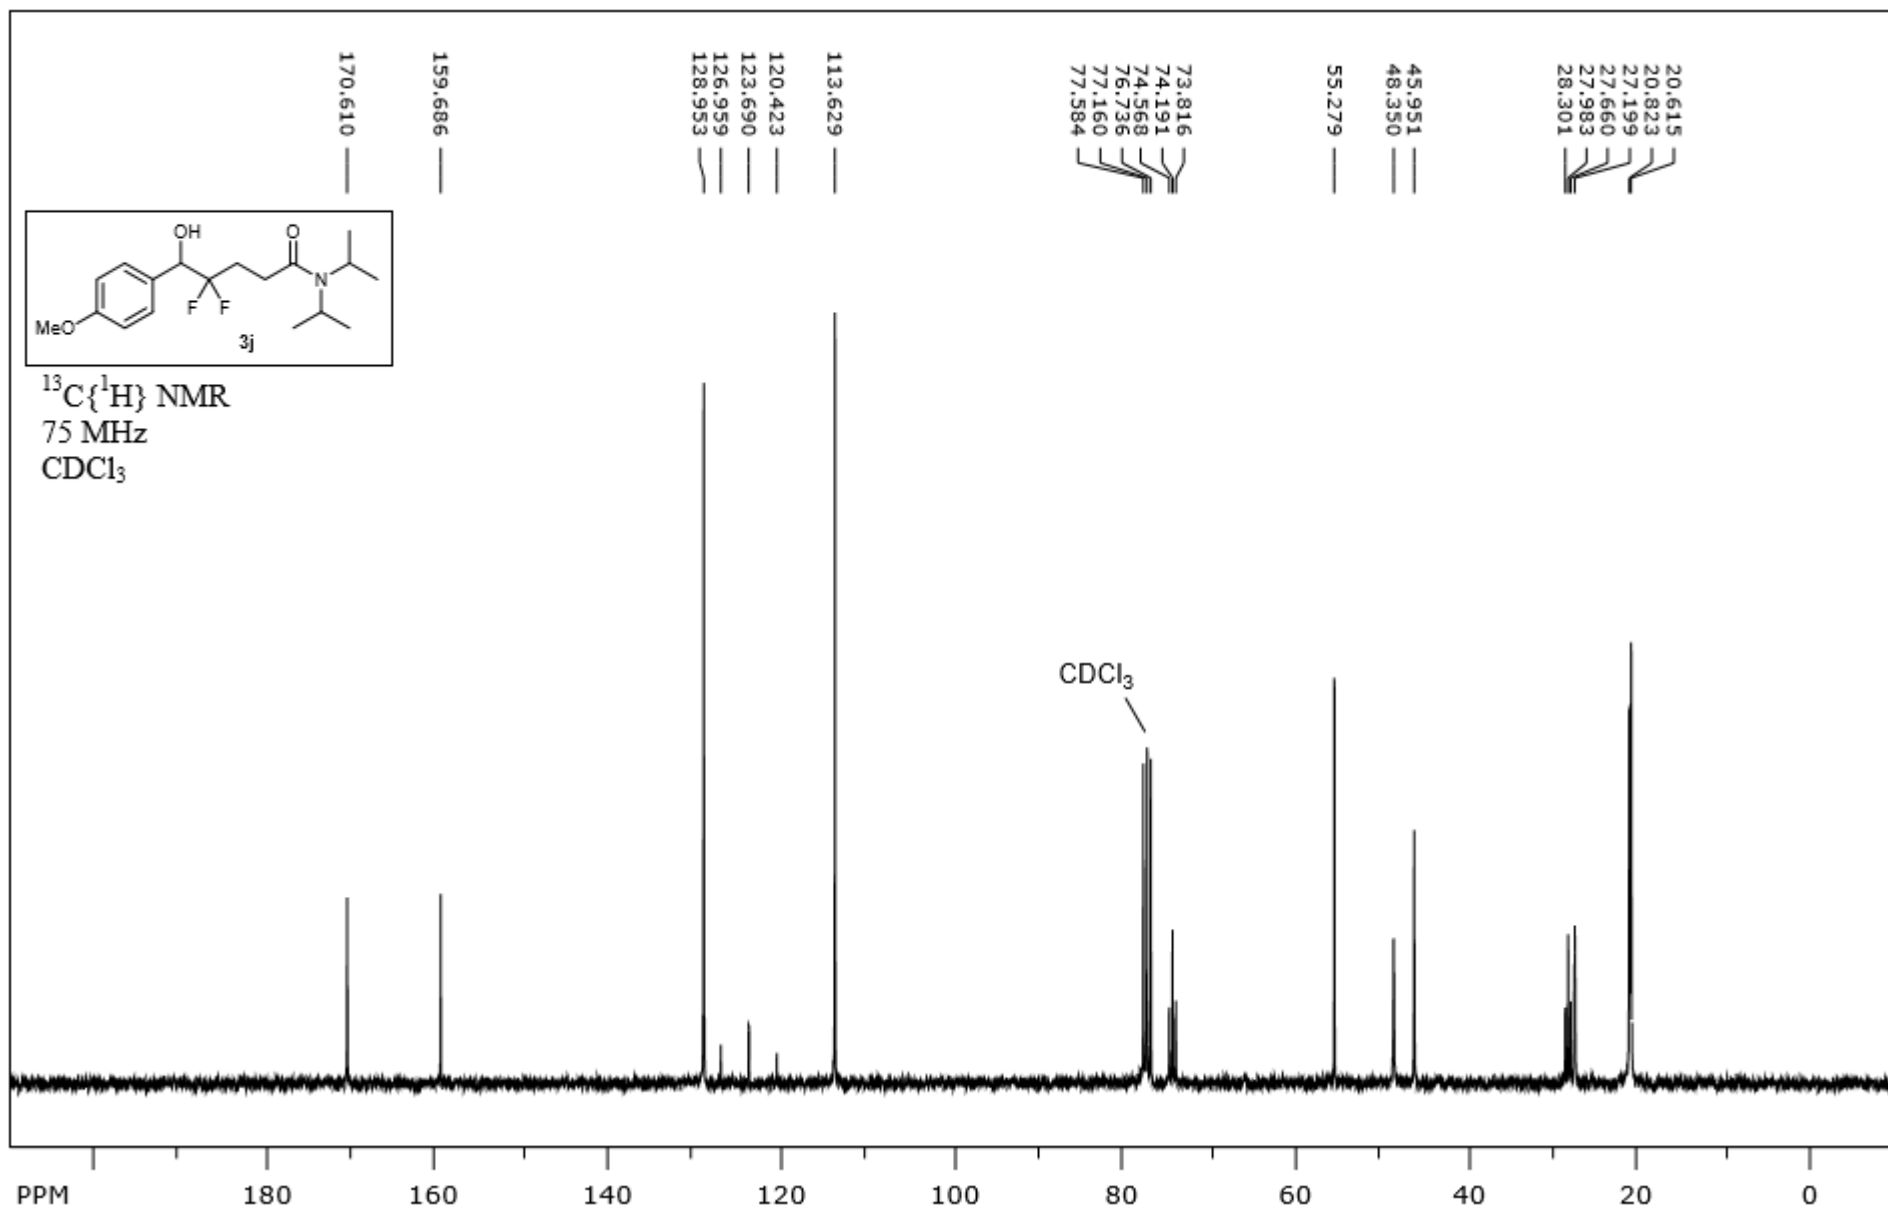

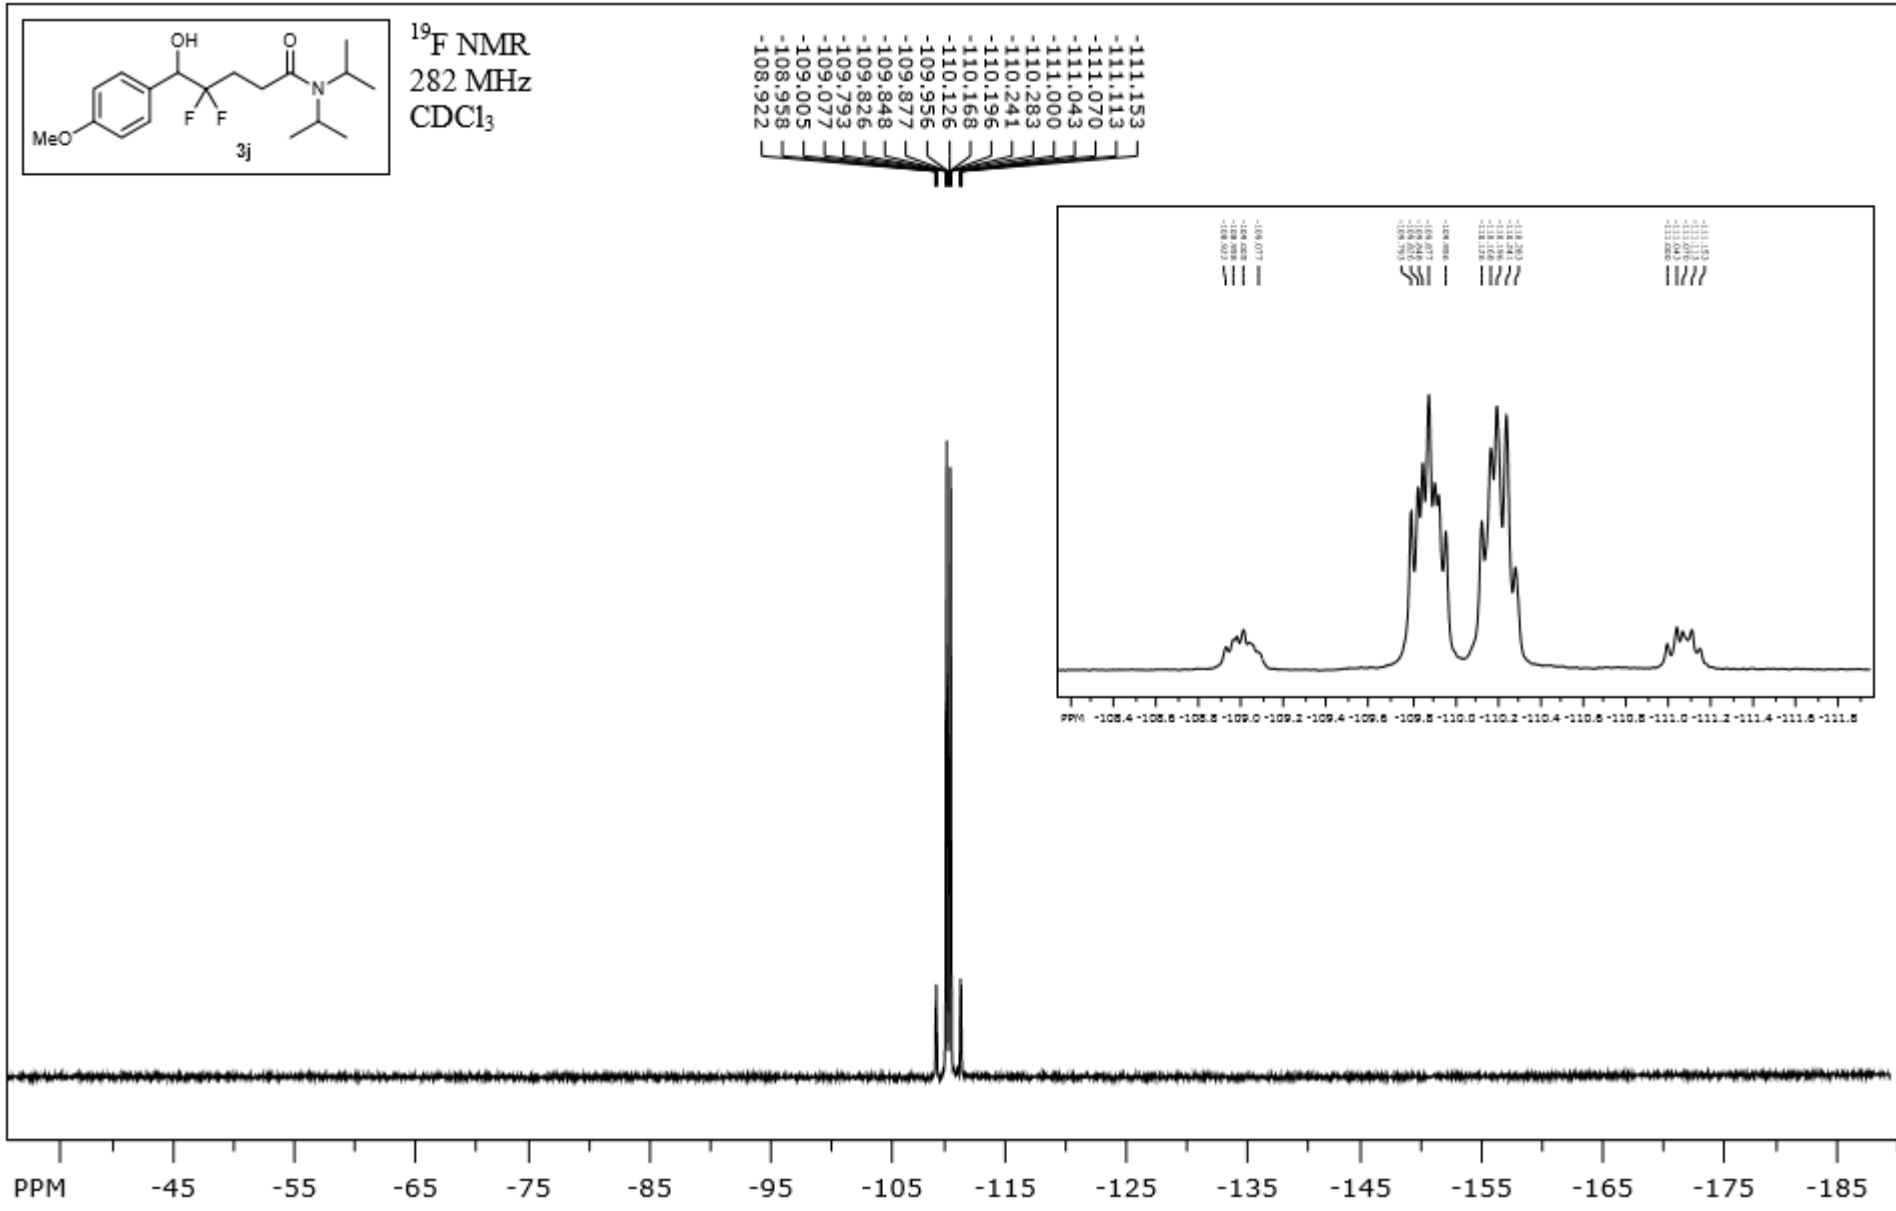

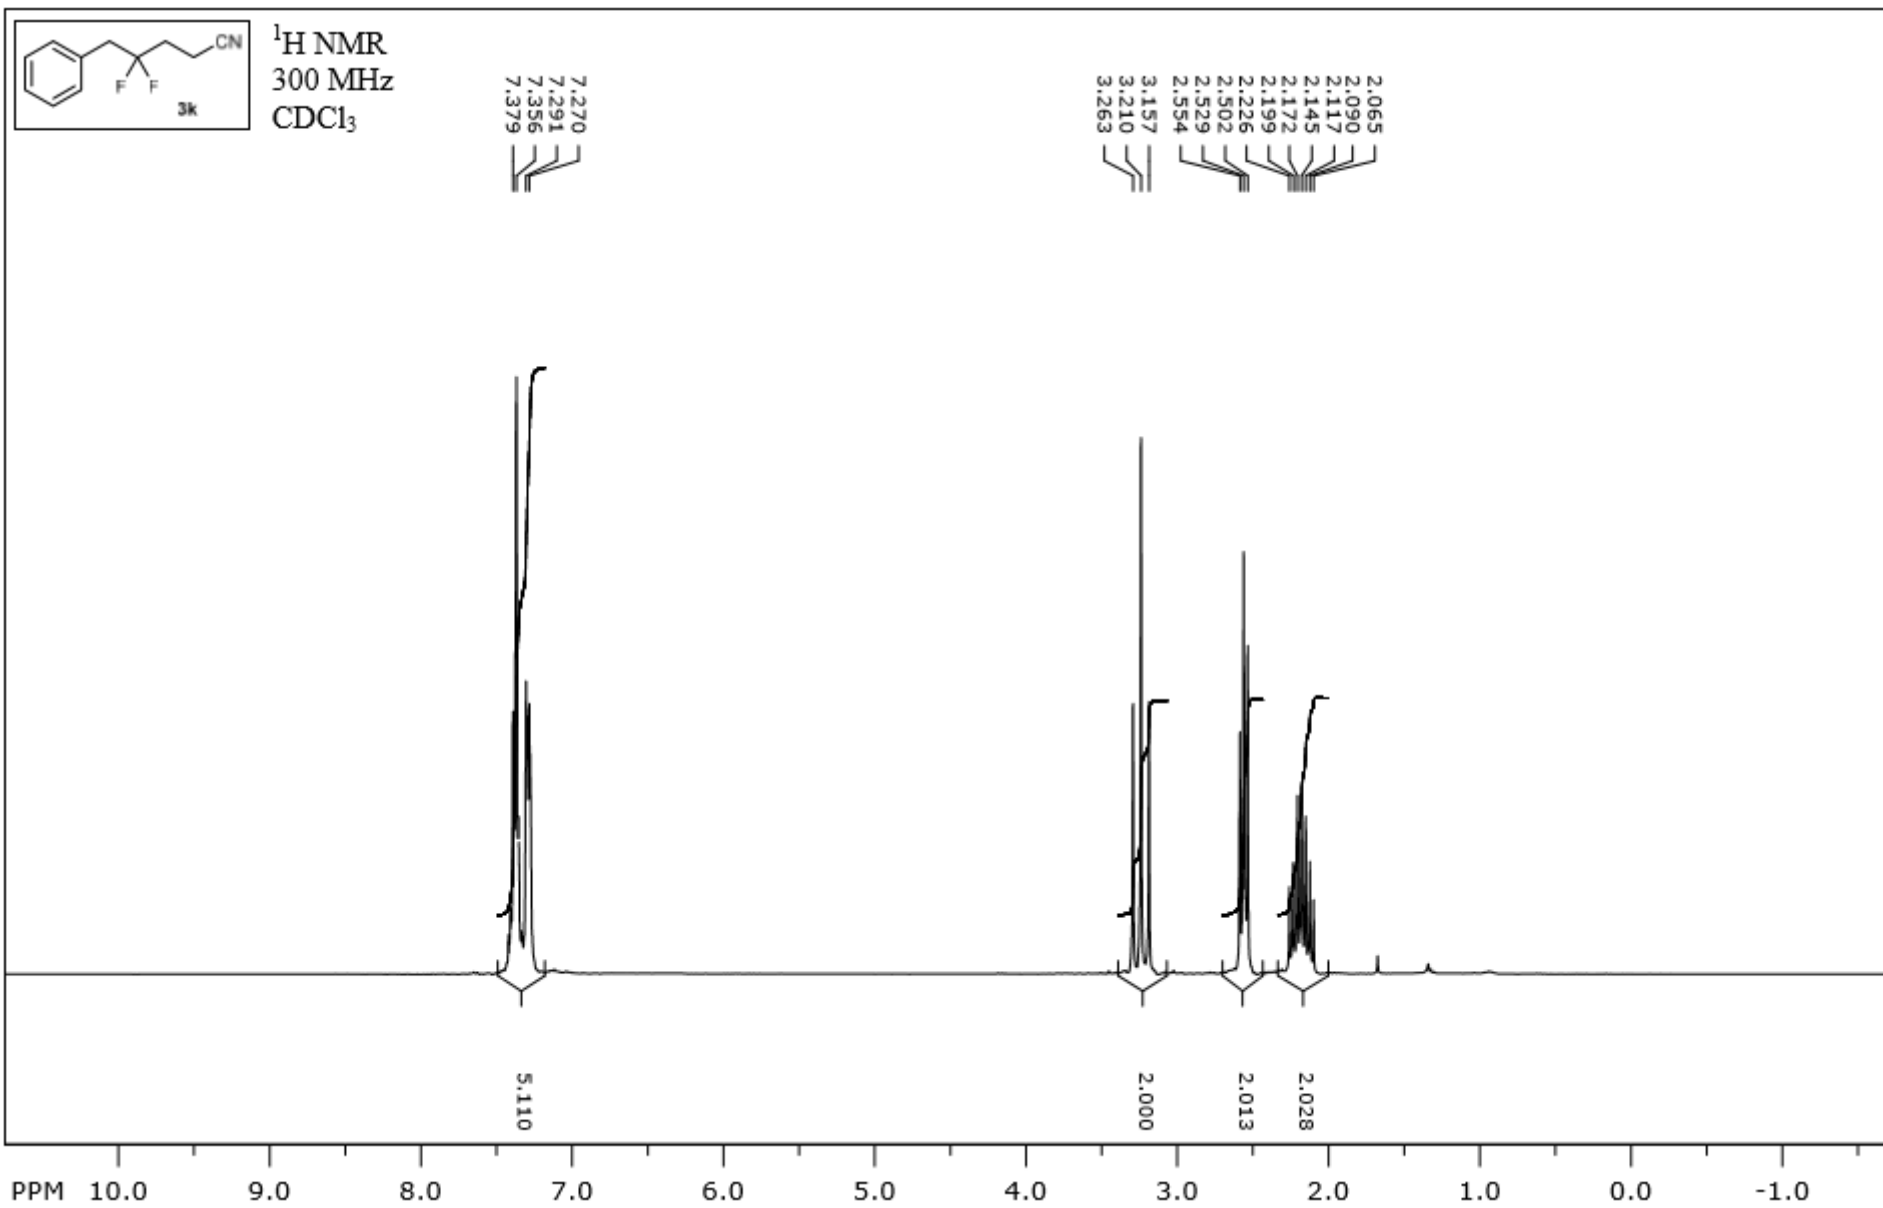



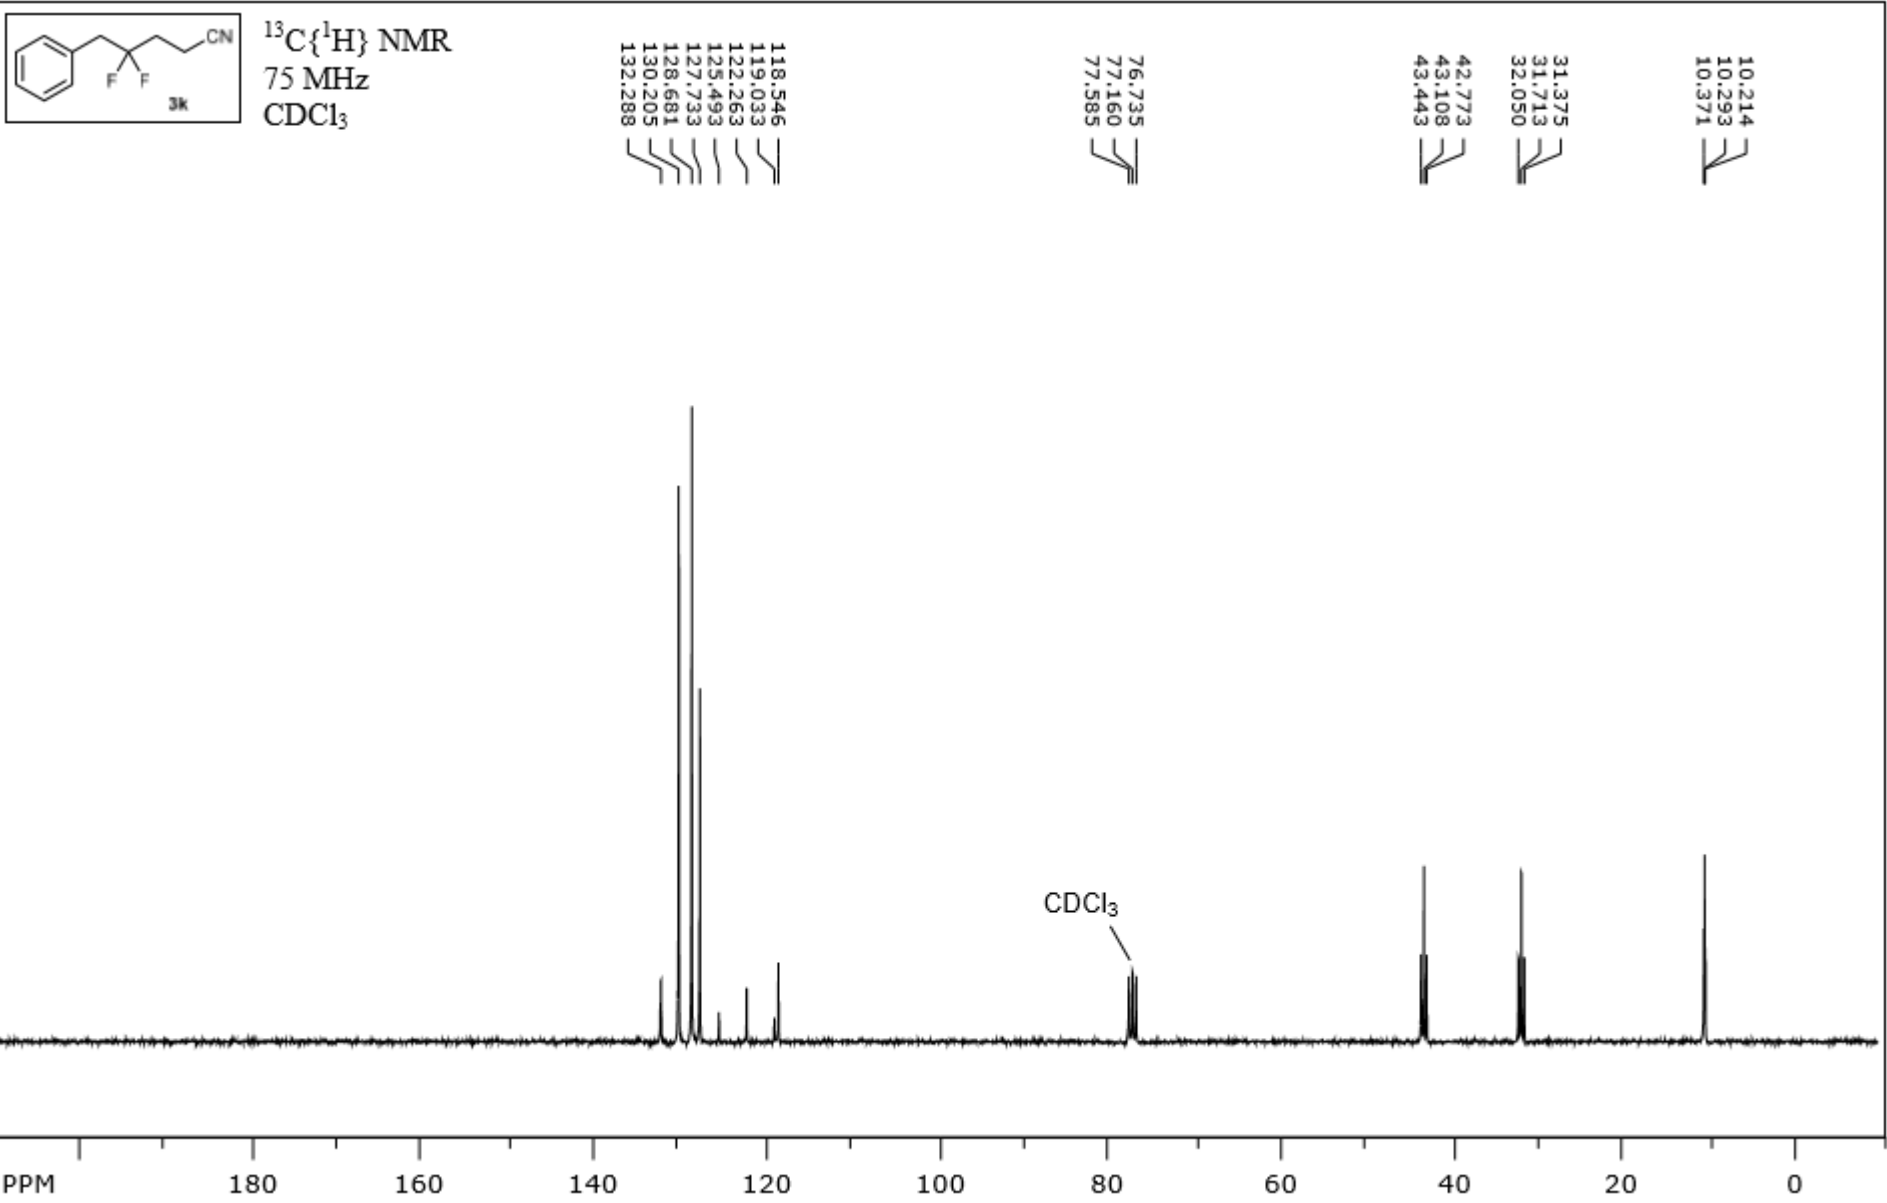

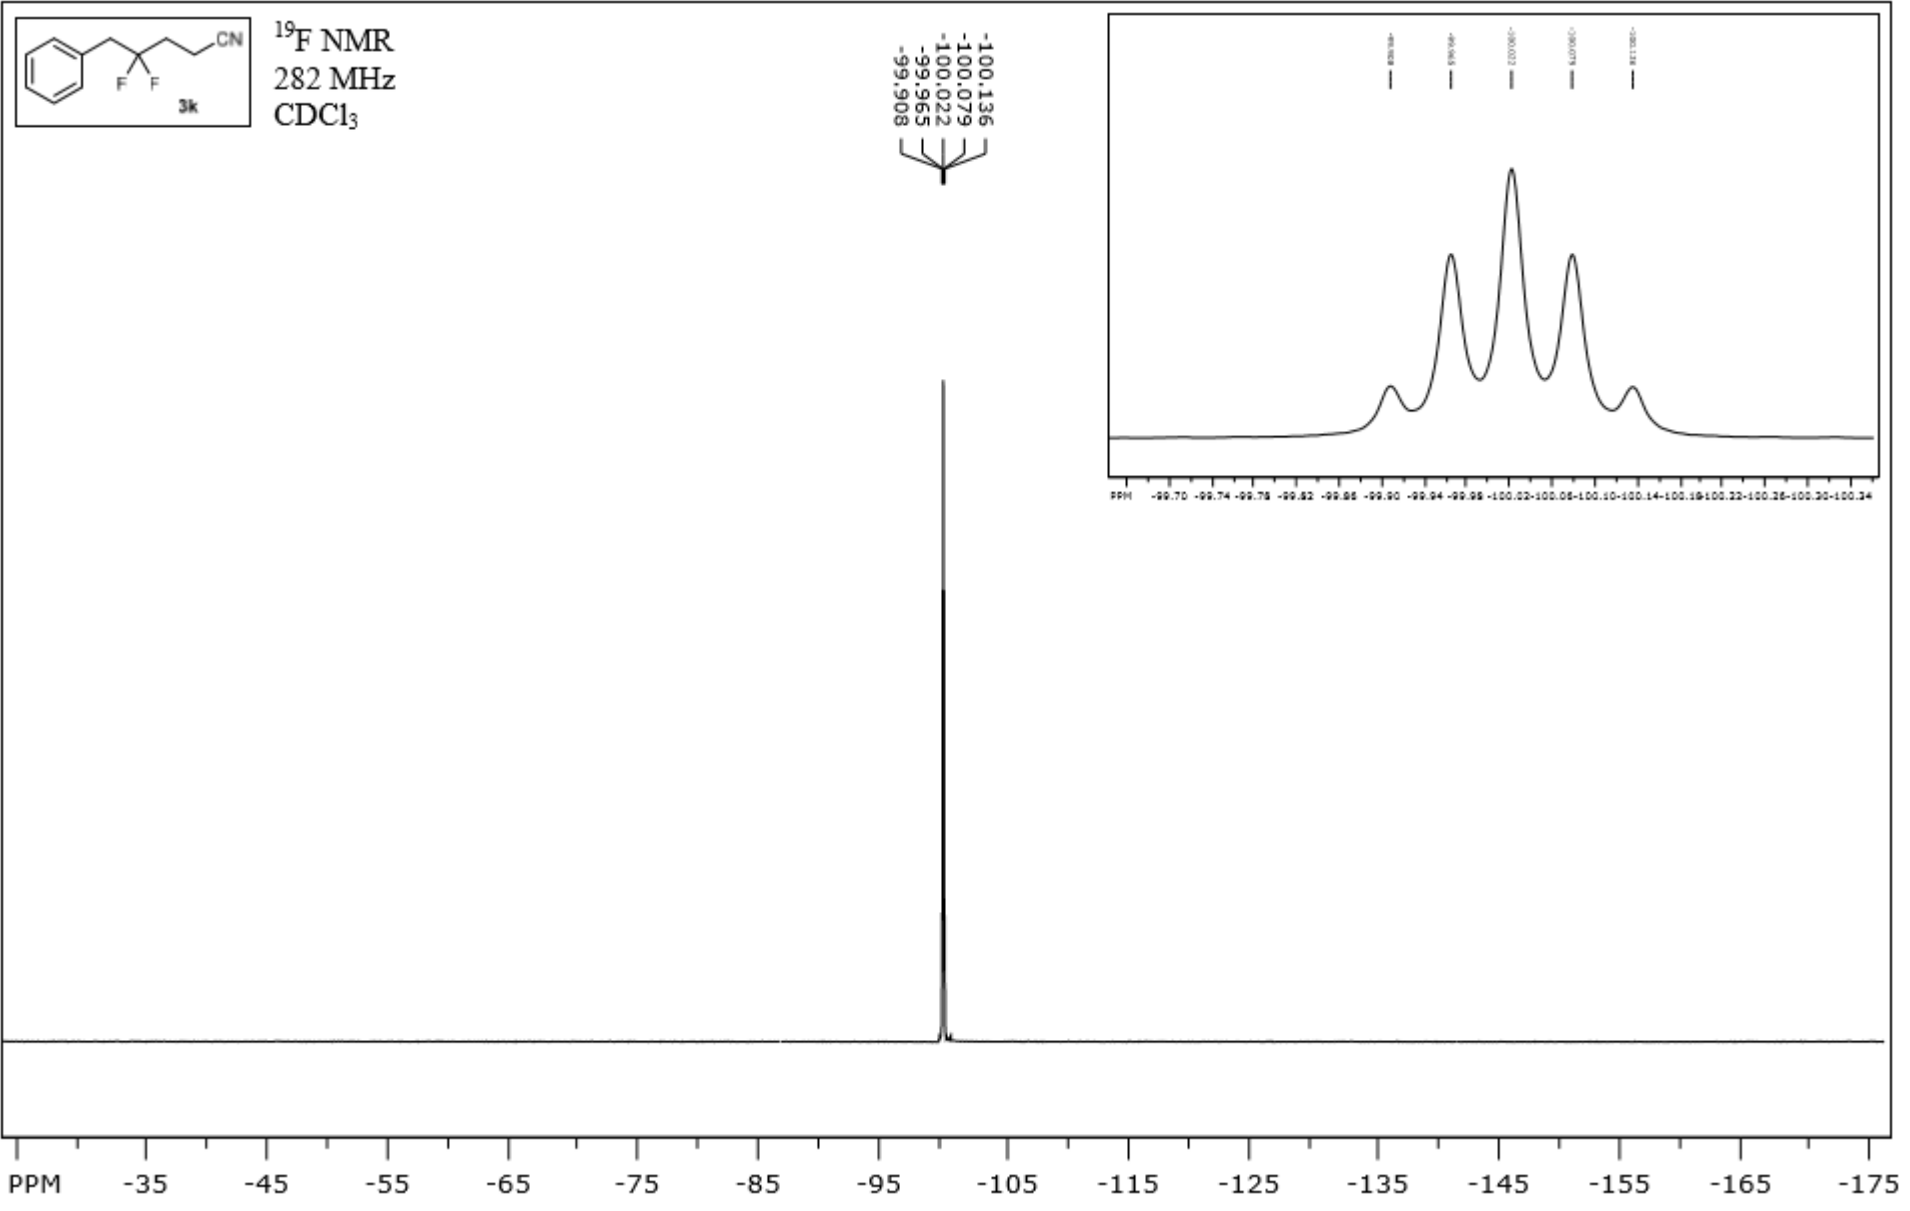

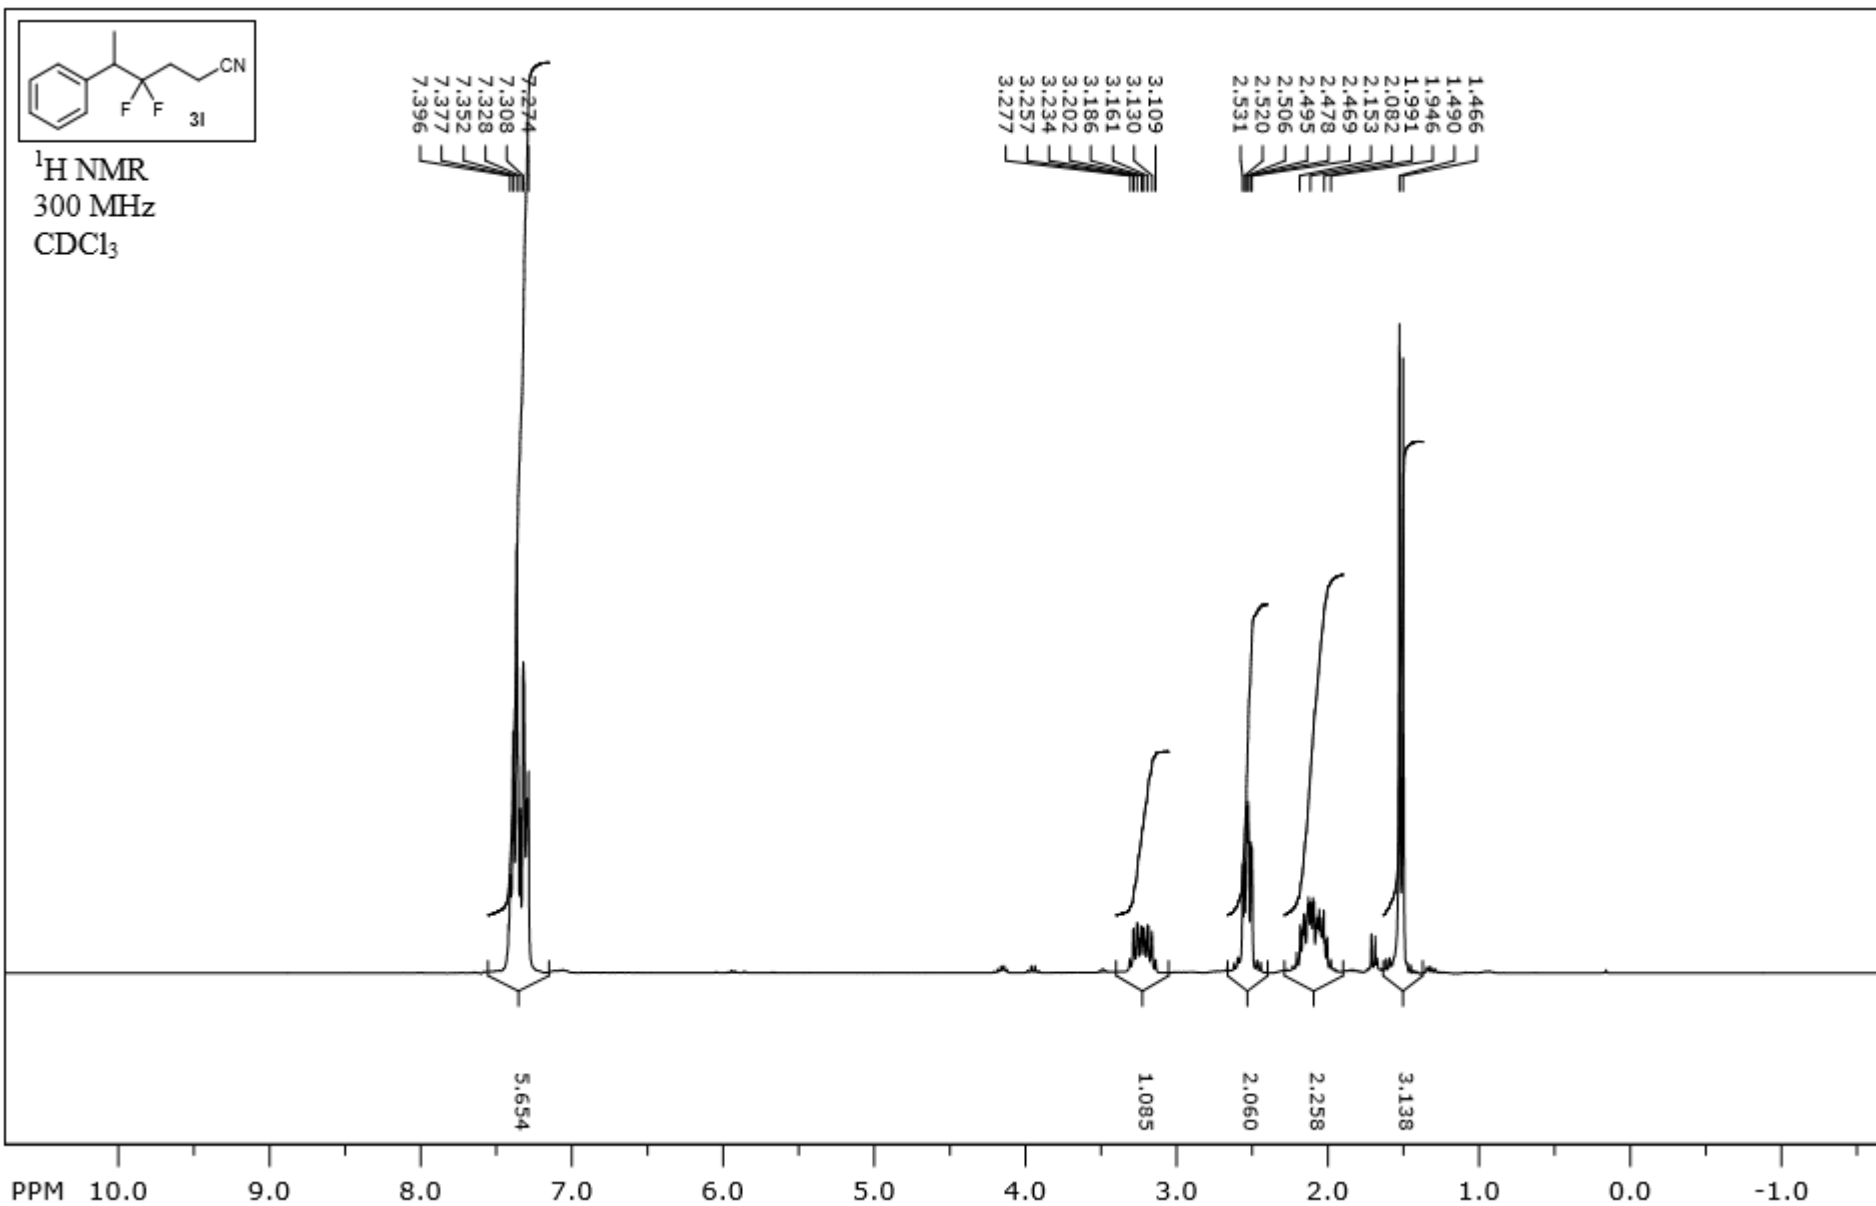

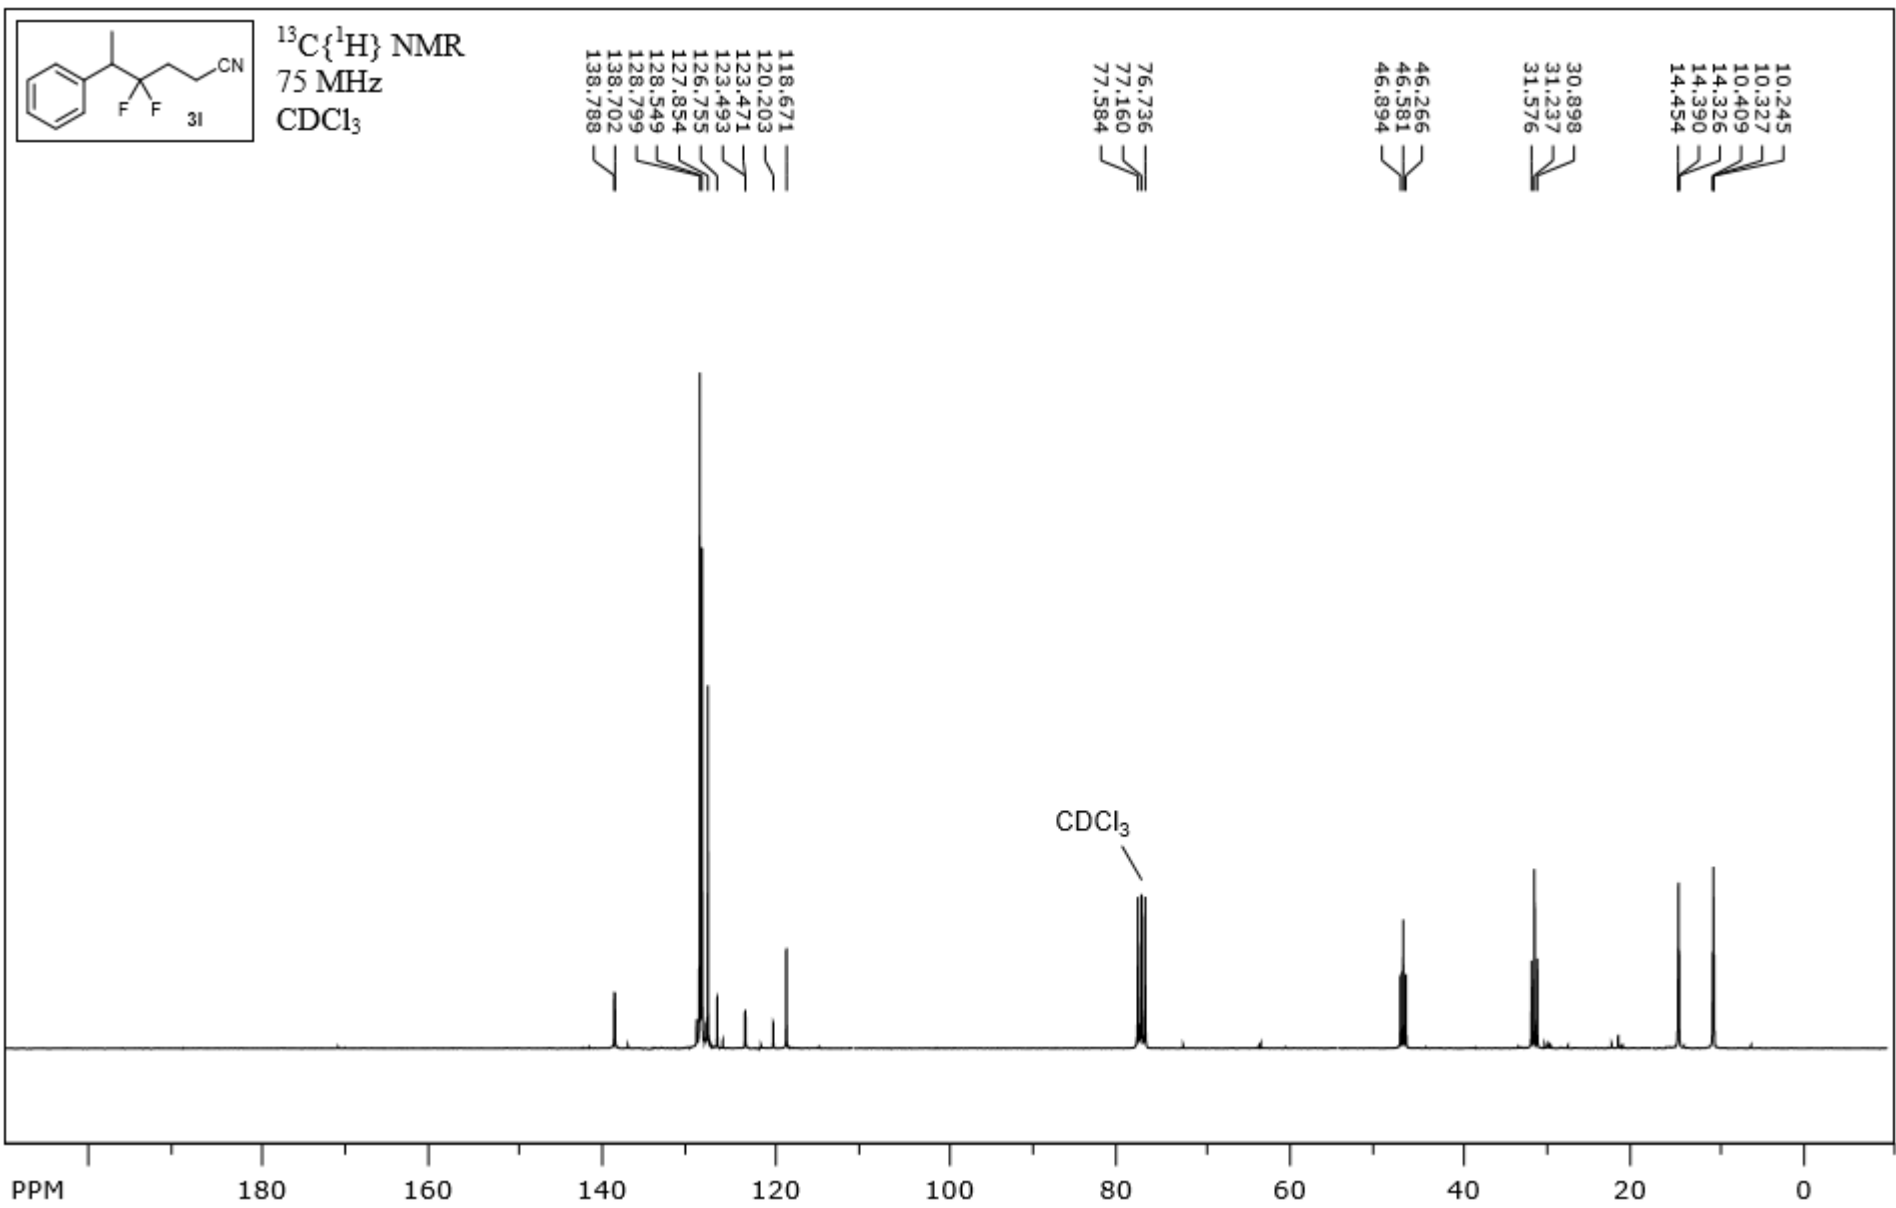

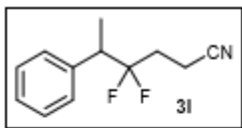

<sup>19</sup>F NMR  
282 MHz  
CDCl<sub>3</sub>

- 111.722
- 111.698
- 111.628
- 111.557
- 111.534
- 110.866
- 110.797
- 110.741
- 110.673
- 105.007
- 104.975
- 104.947
- 104.914
- 104.886
- 104.853
- 104.147
- 104.117
- 104.088
- 104.056
- 104.026
- 103.996

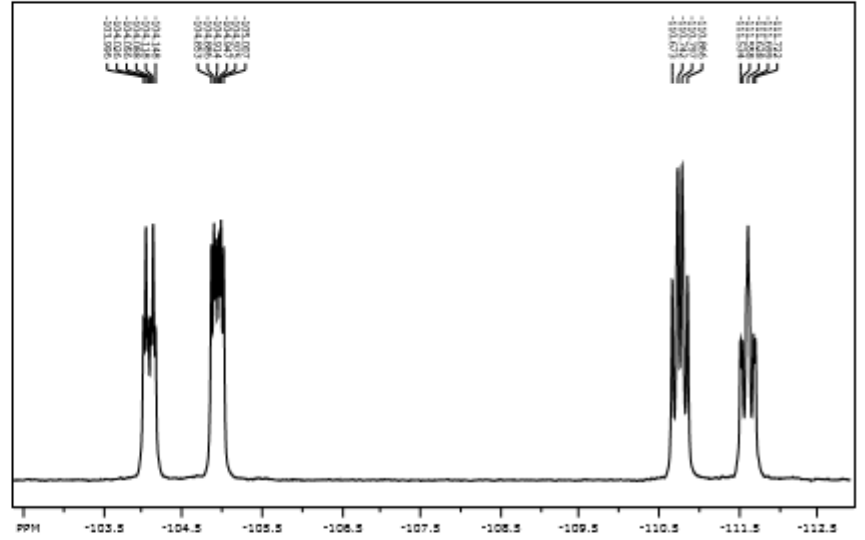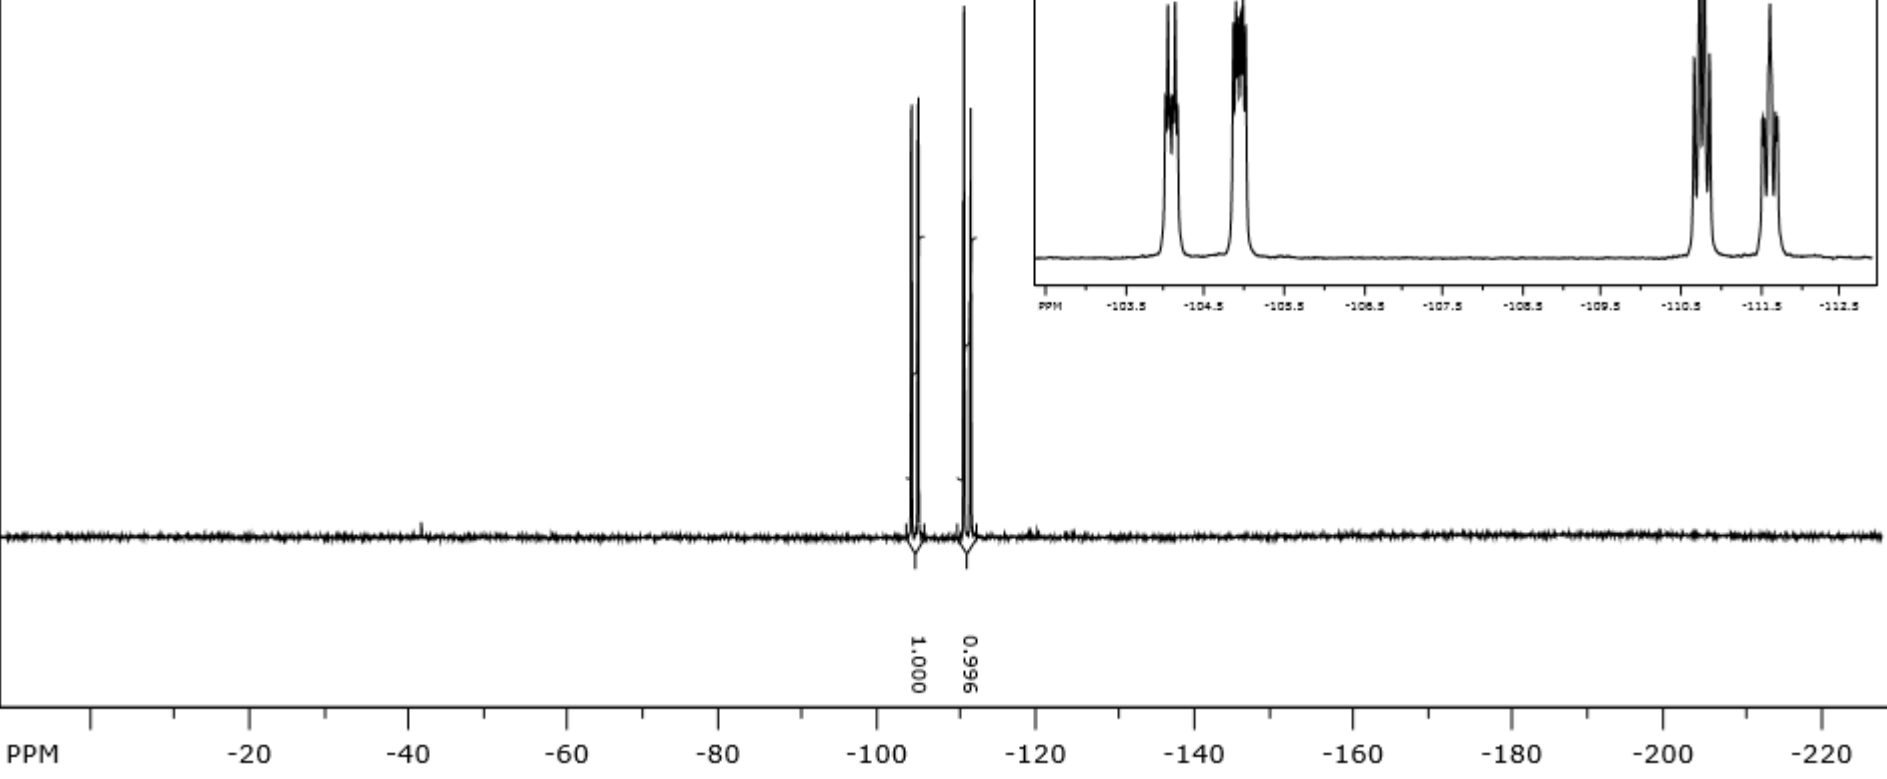

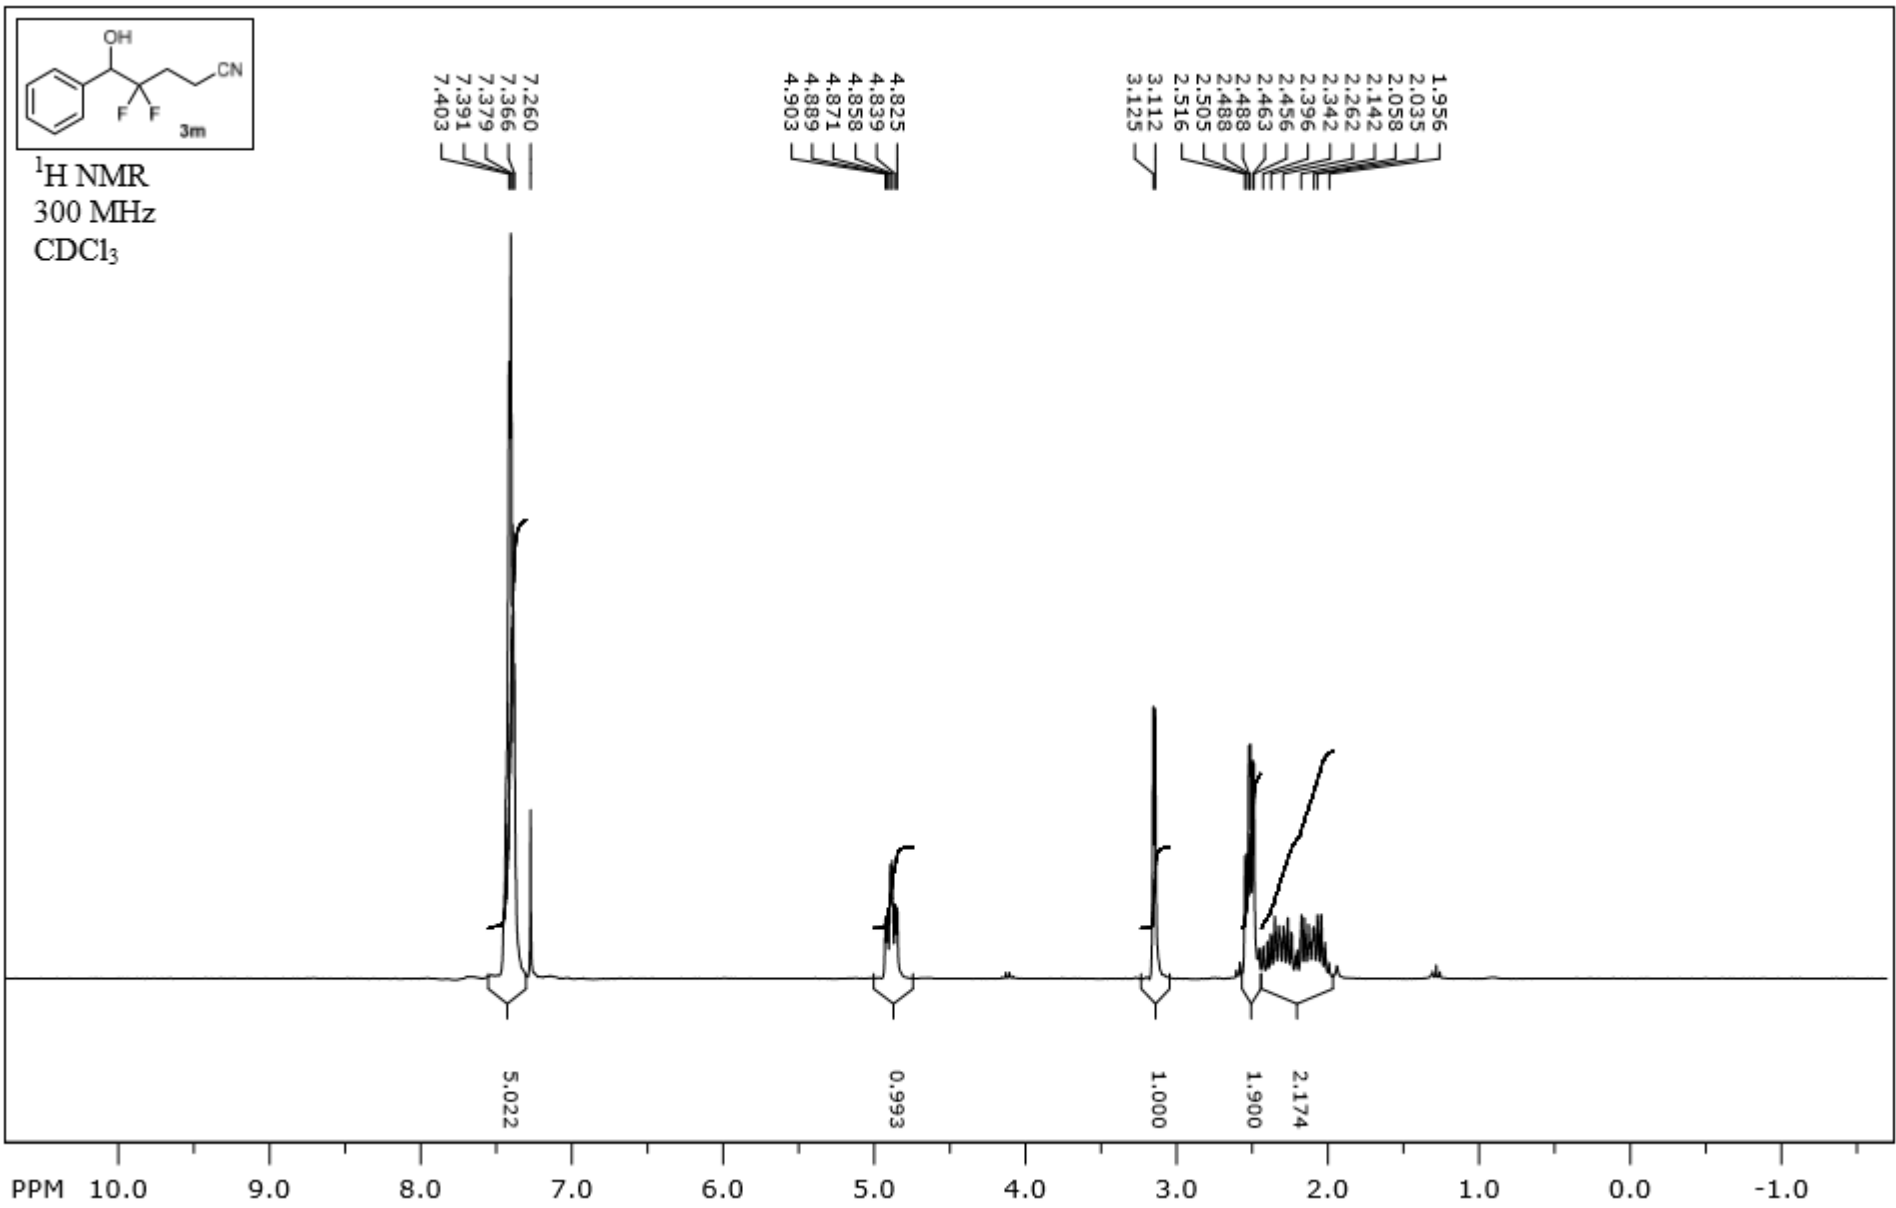

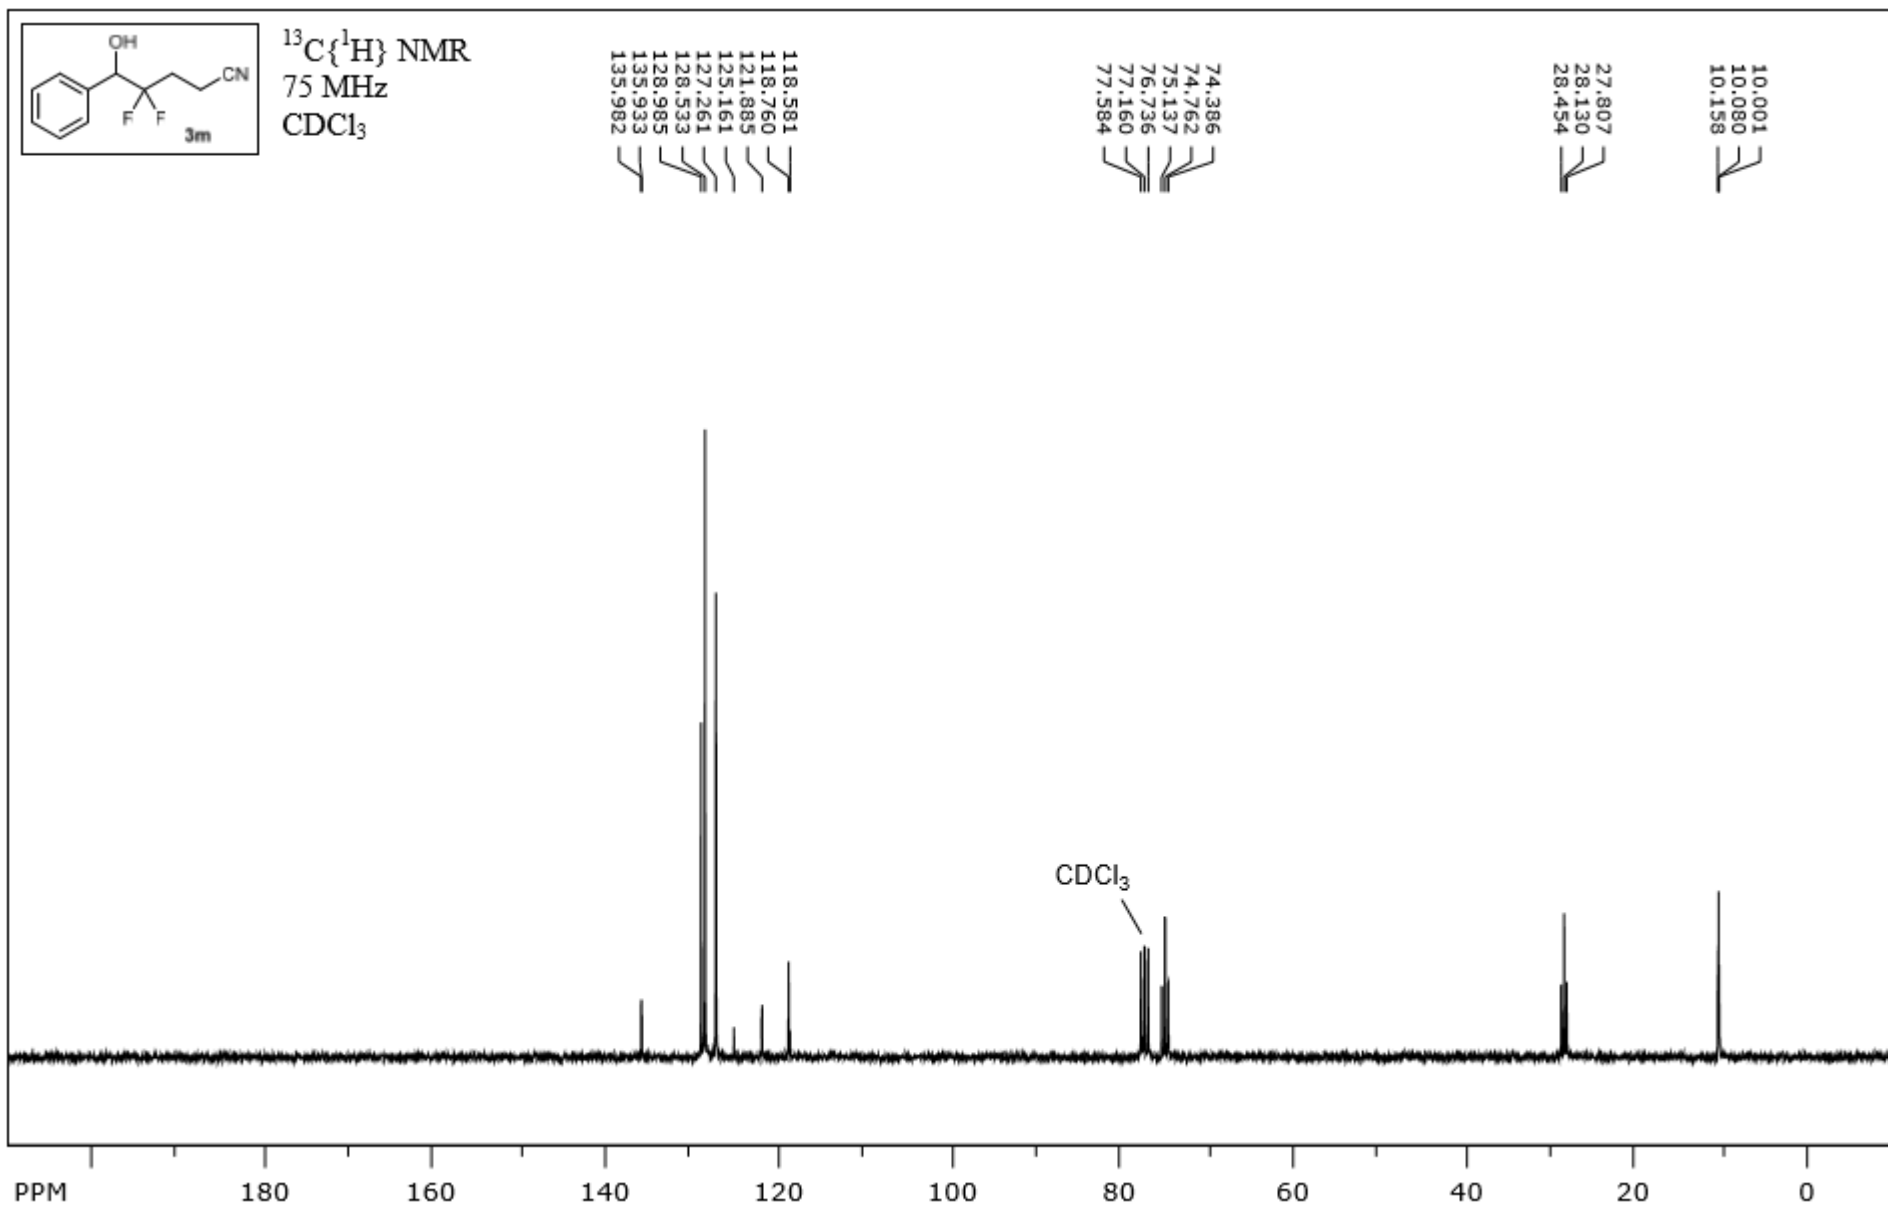

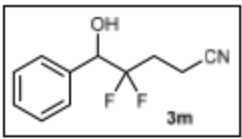

<sup>19</sup>F NMR  
282 MHz  
CDCl<sub>3</sub>

-112.296  
-112.264  
-112.232  
-112.206  
-112.173  
-112.141  
-111.411  
-111.379  
-111.347  
-111.322  
-111.289  
-111.256  
-110.646  
-110.613  
-110.581  
-110.555  
-110.523  
-110.491  
-109.761  
-109.729  
-109.698  
-109.670  
-109.638  
-109.607

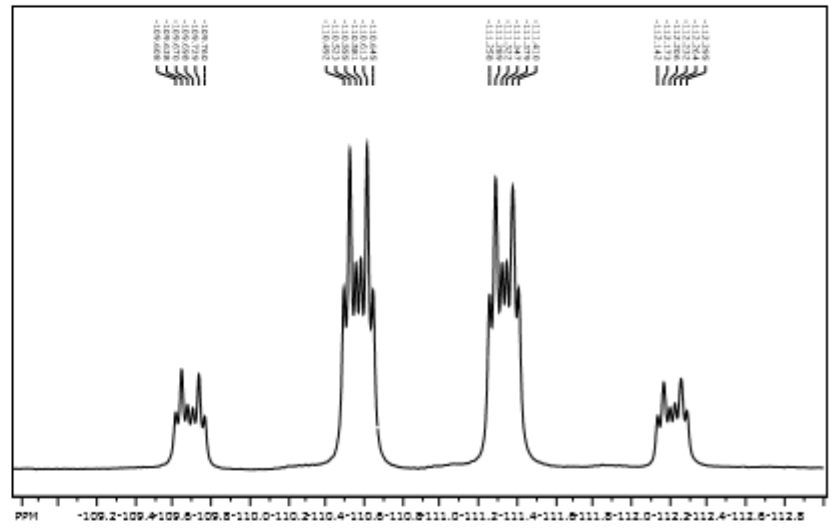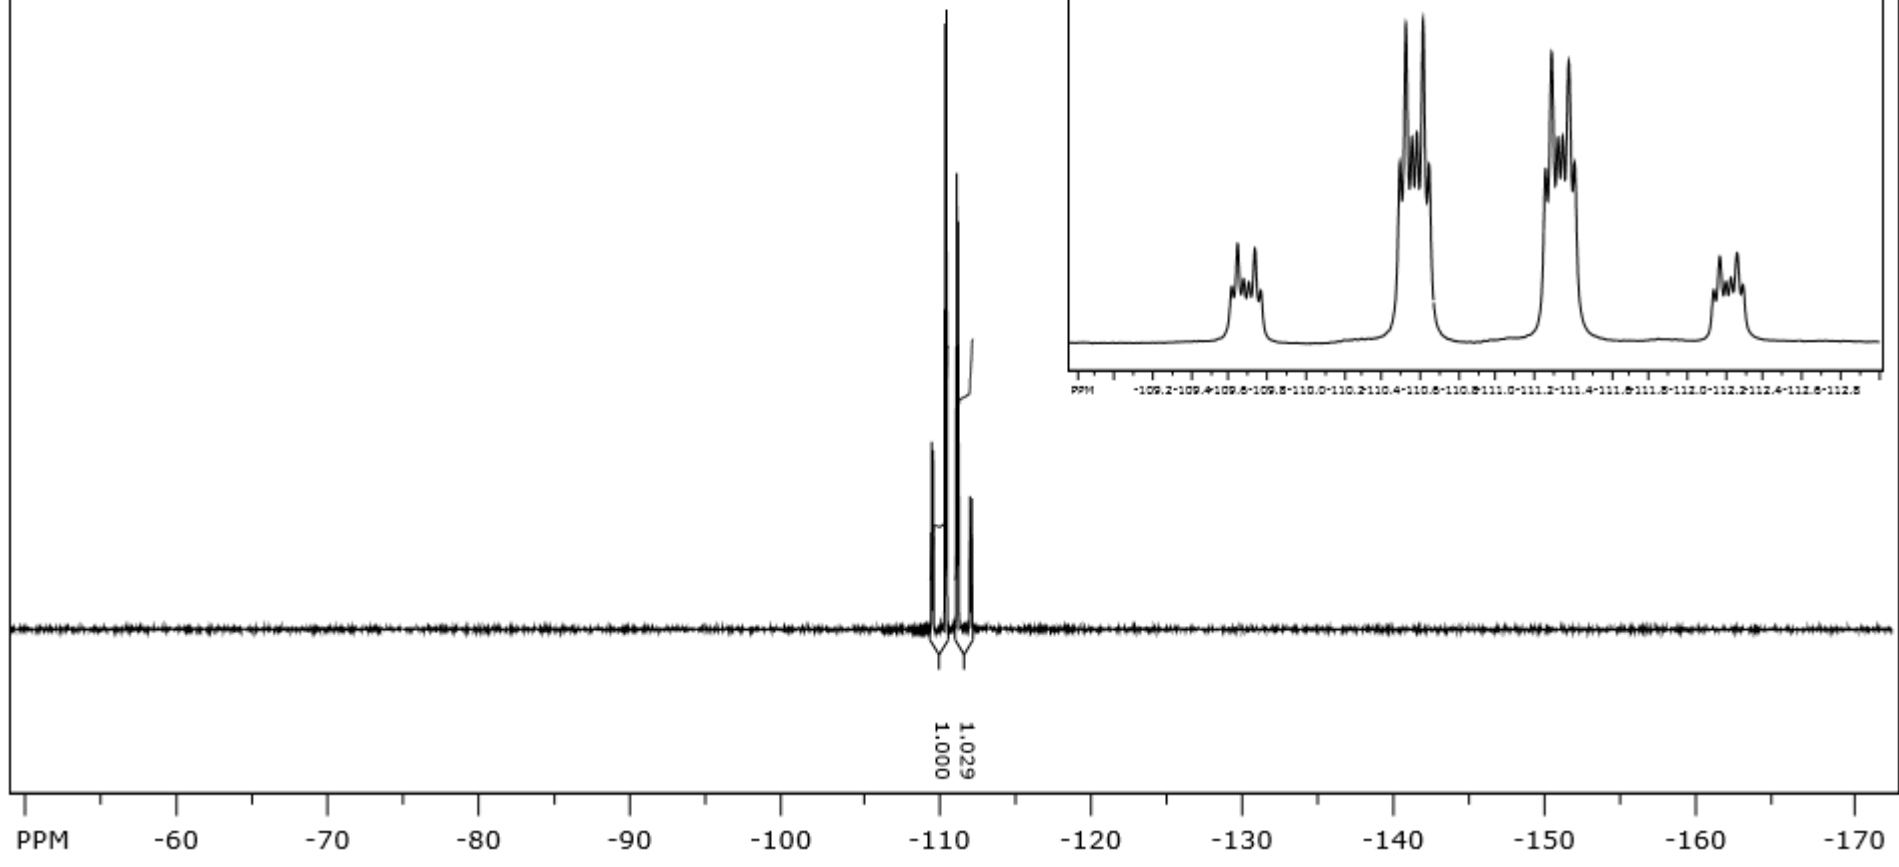



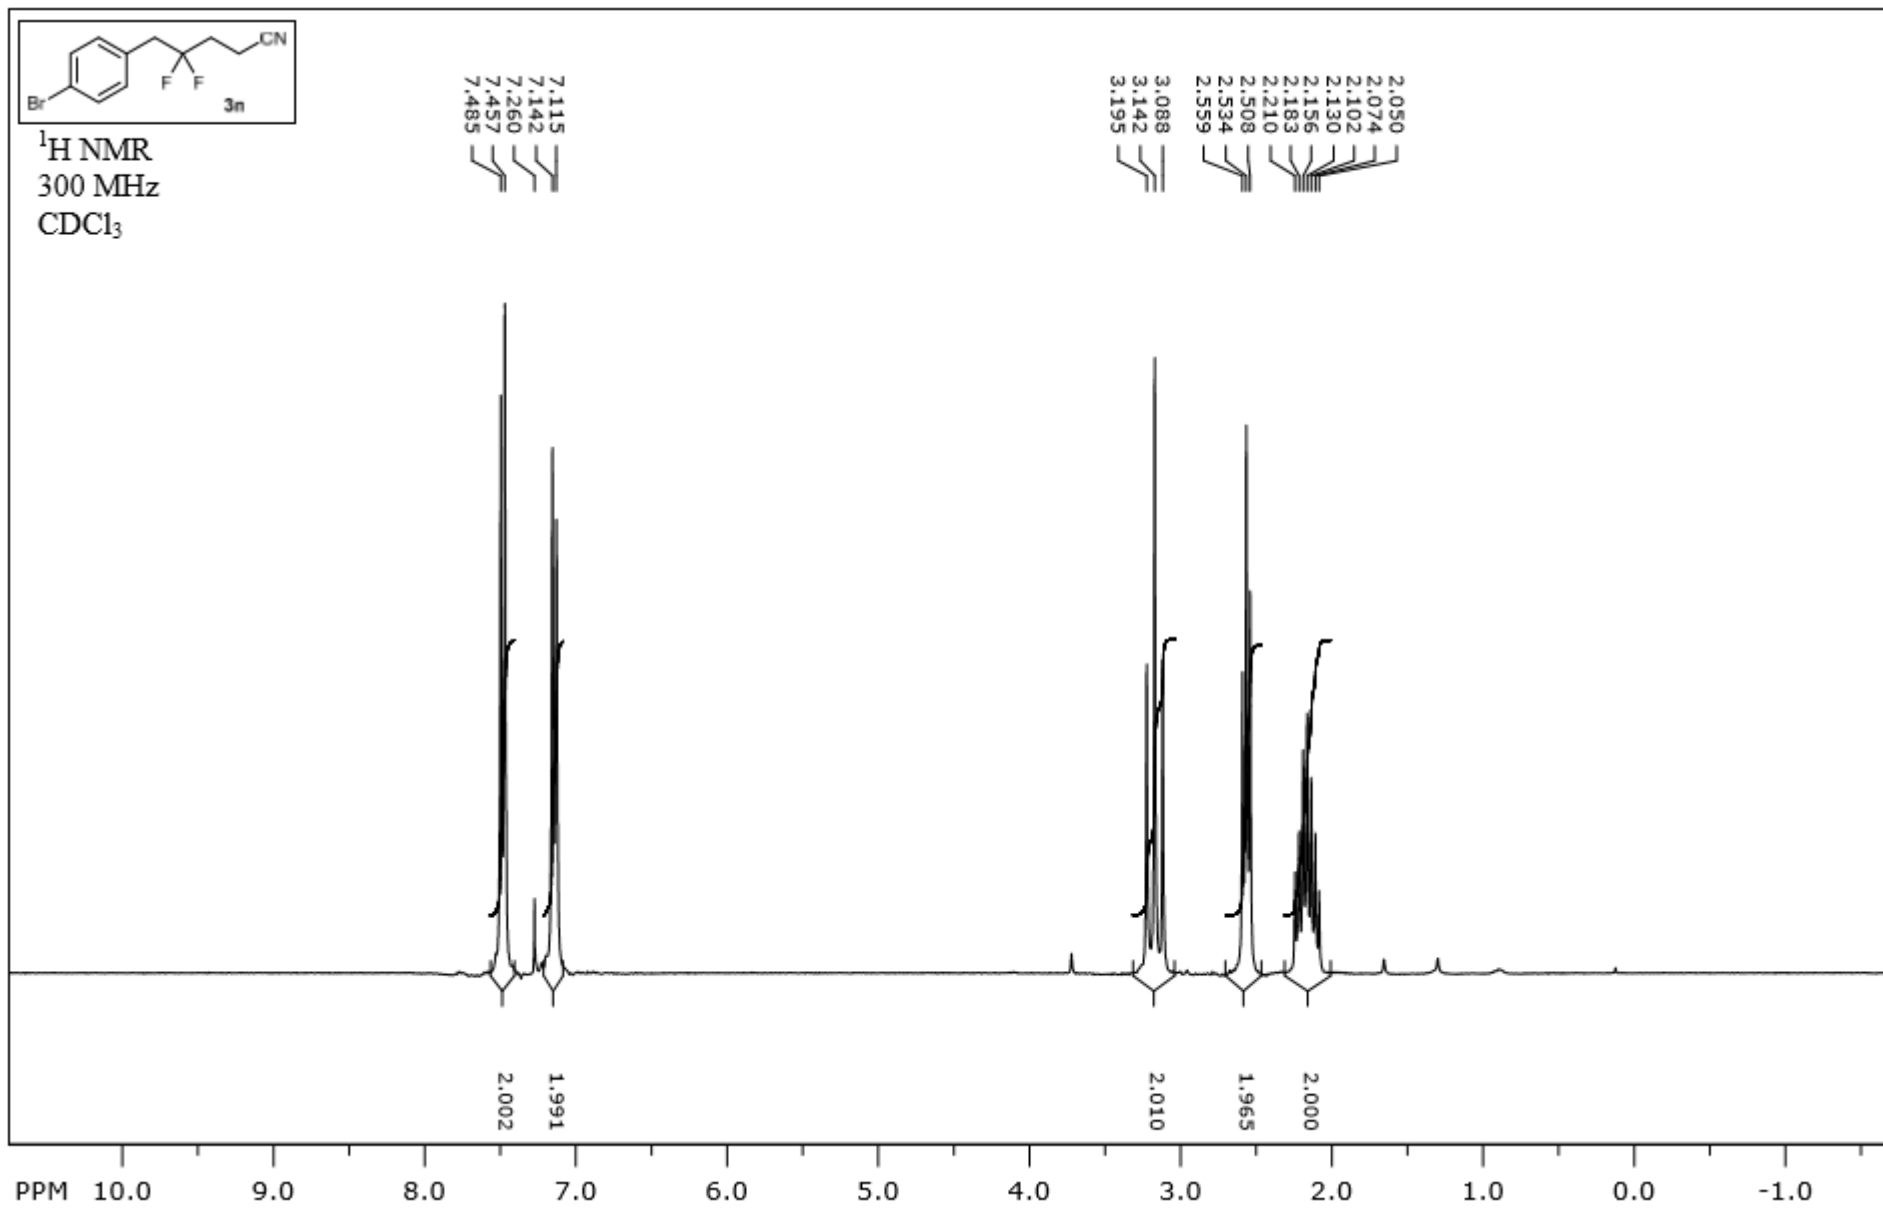

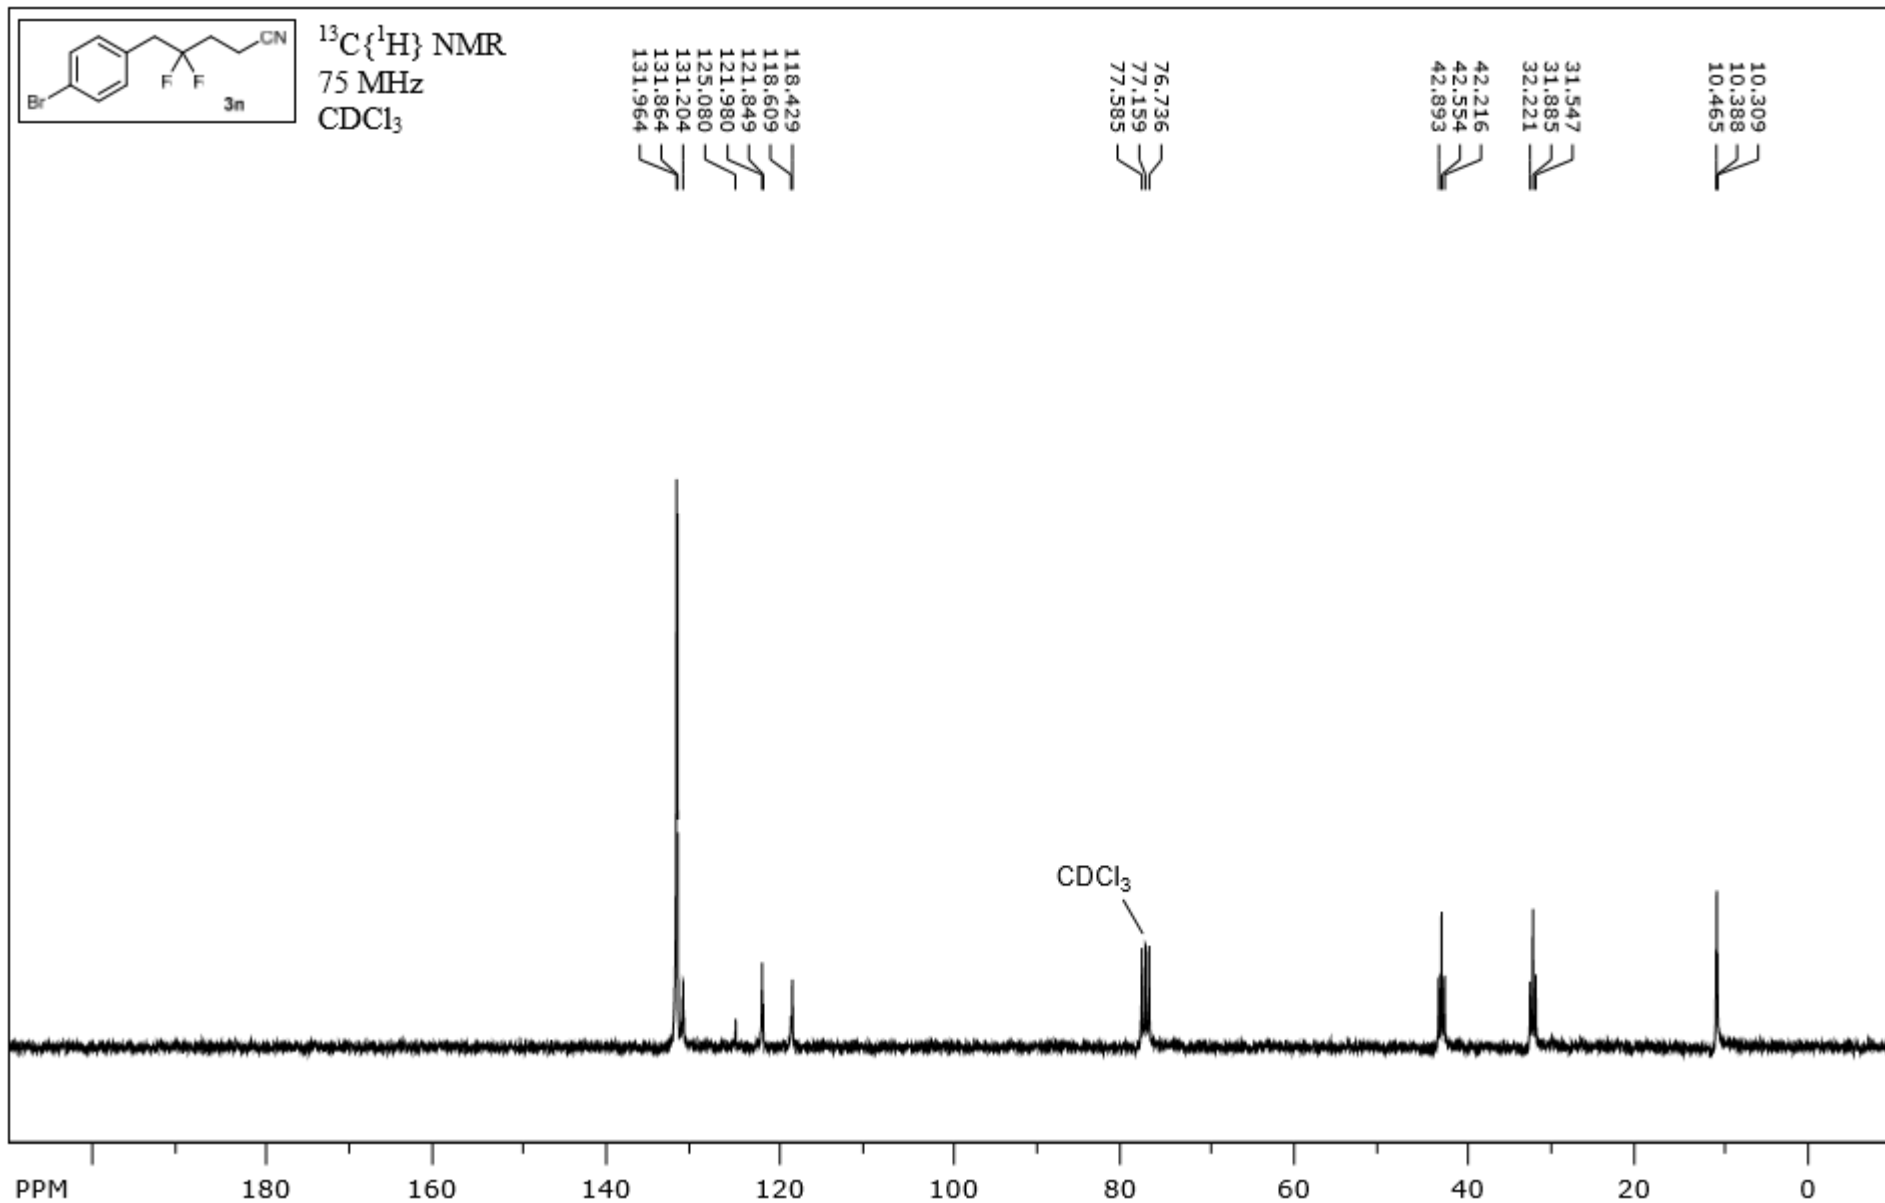

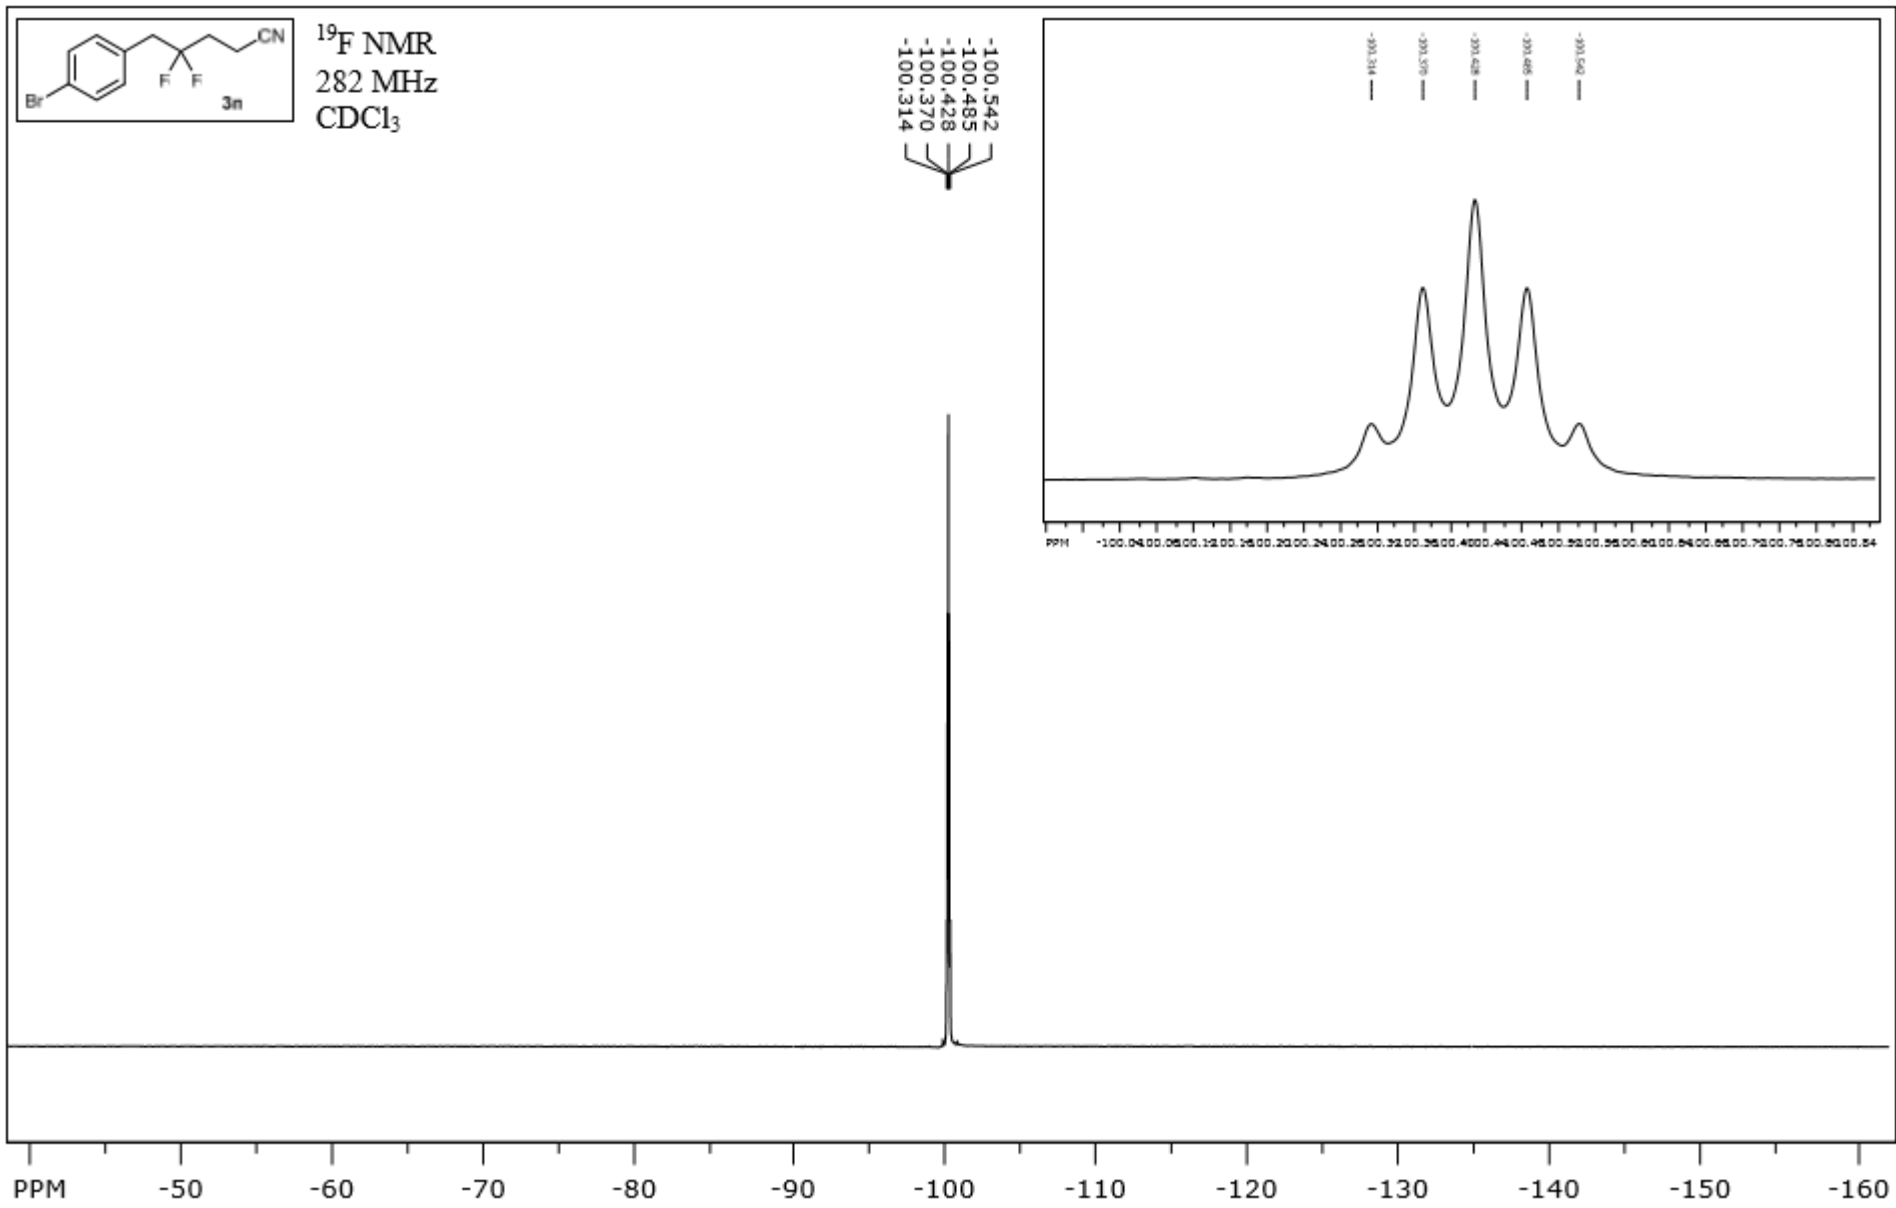

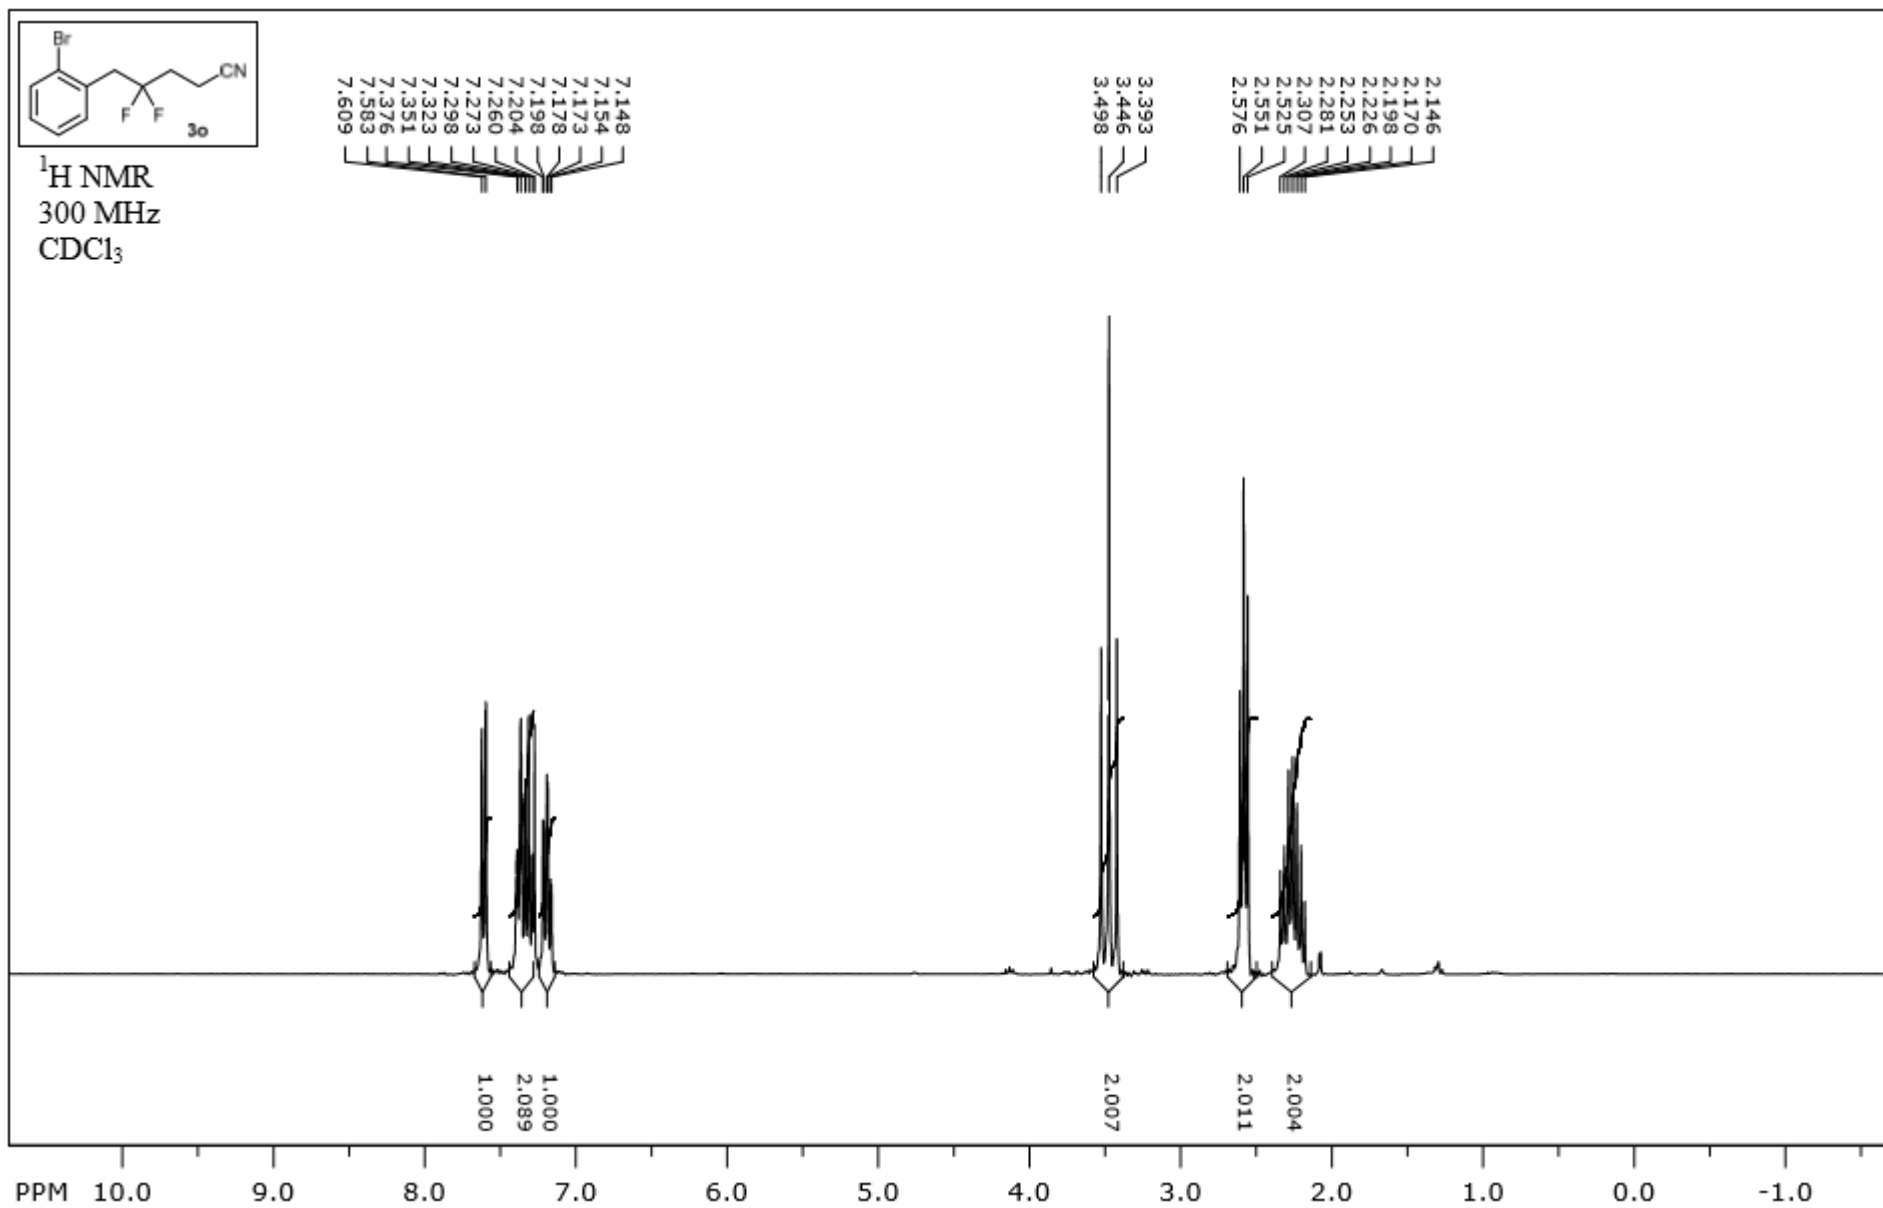

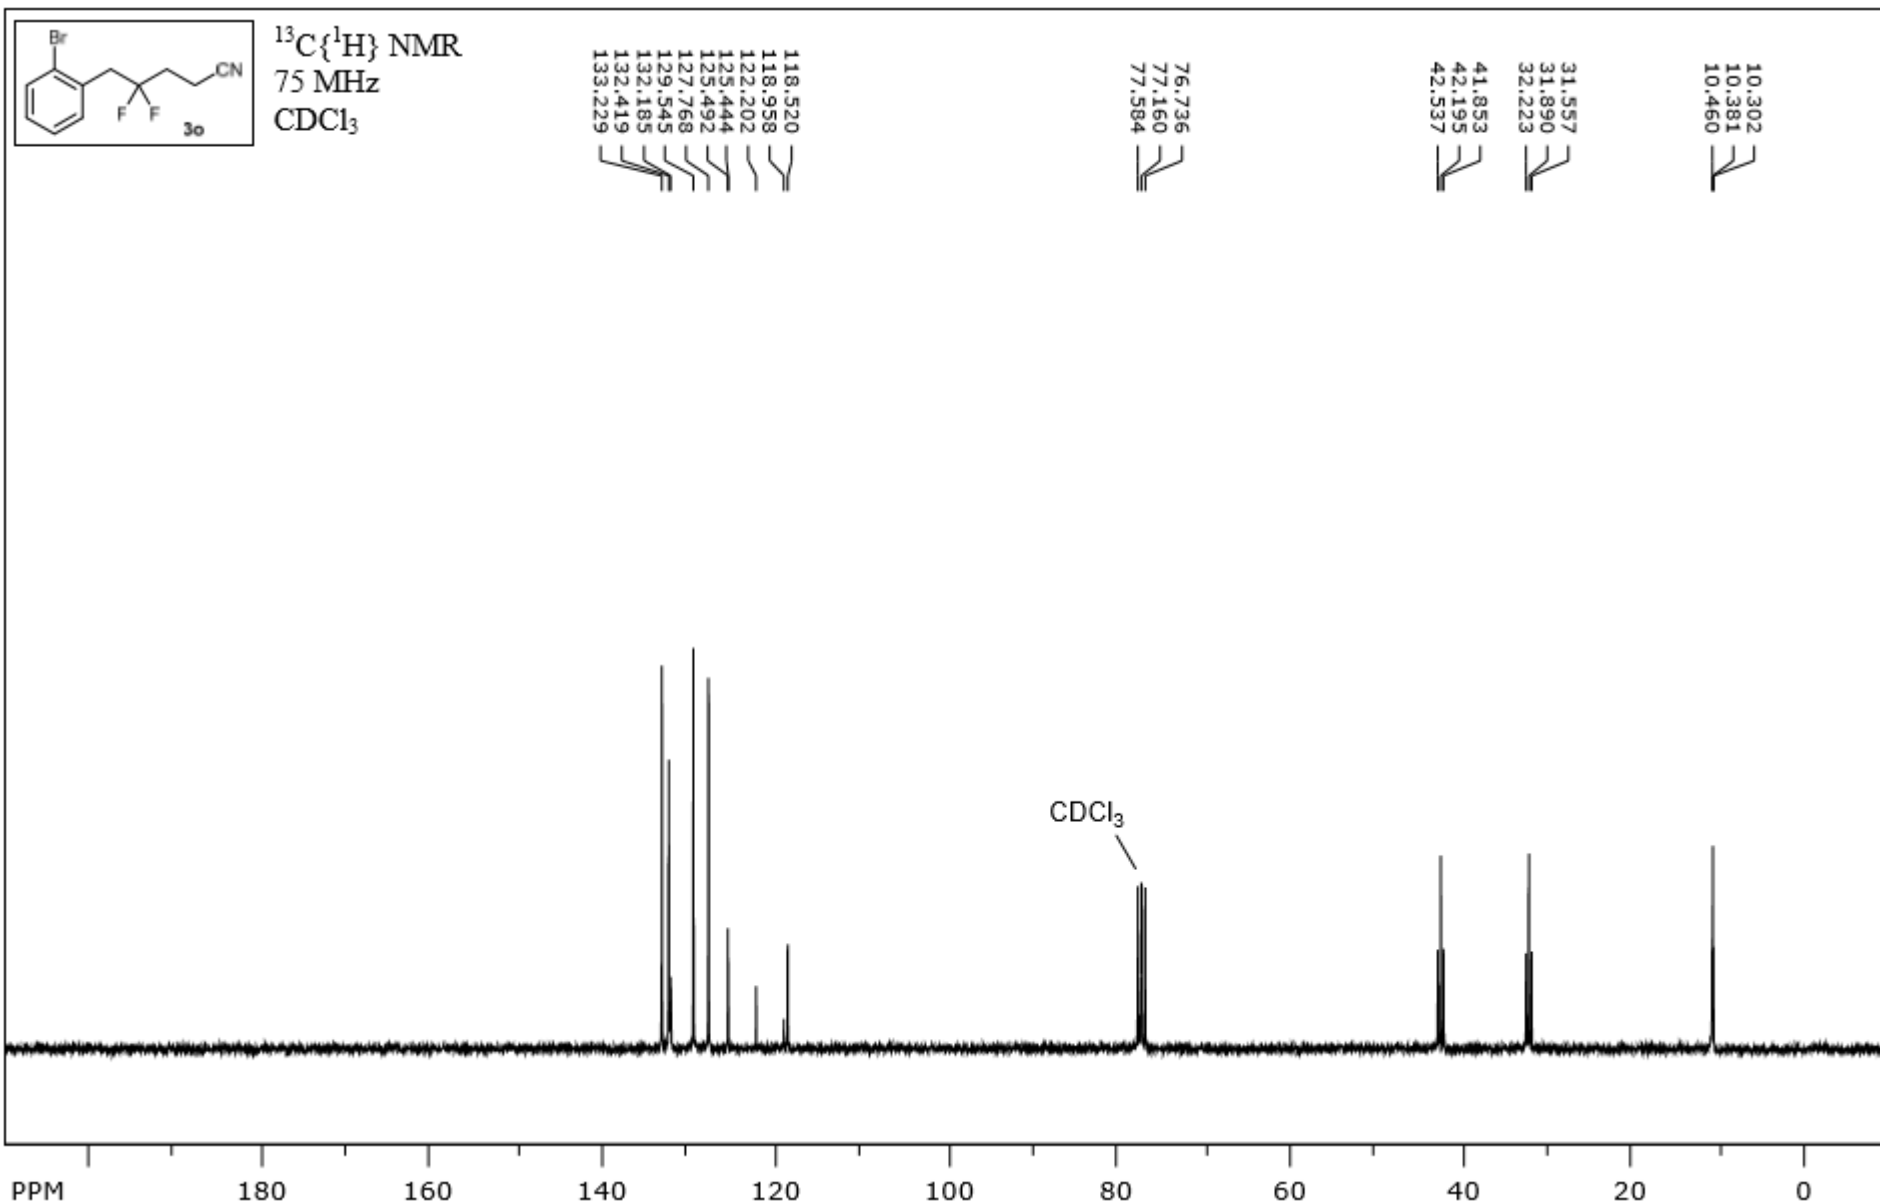

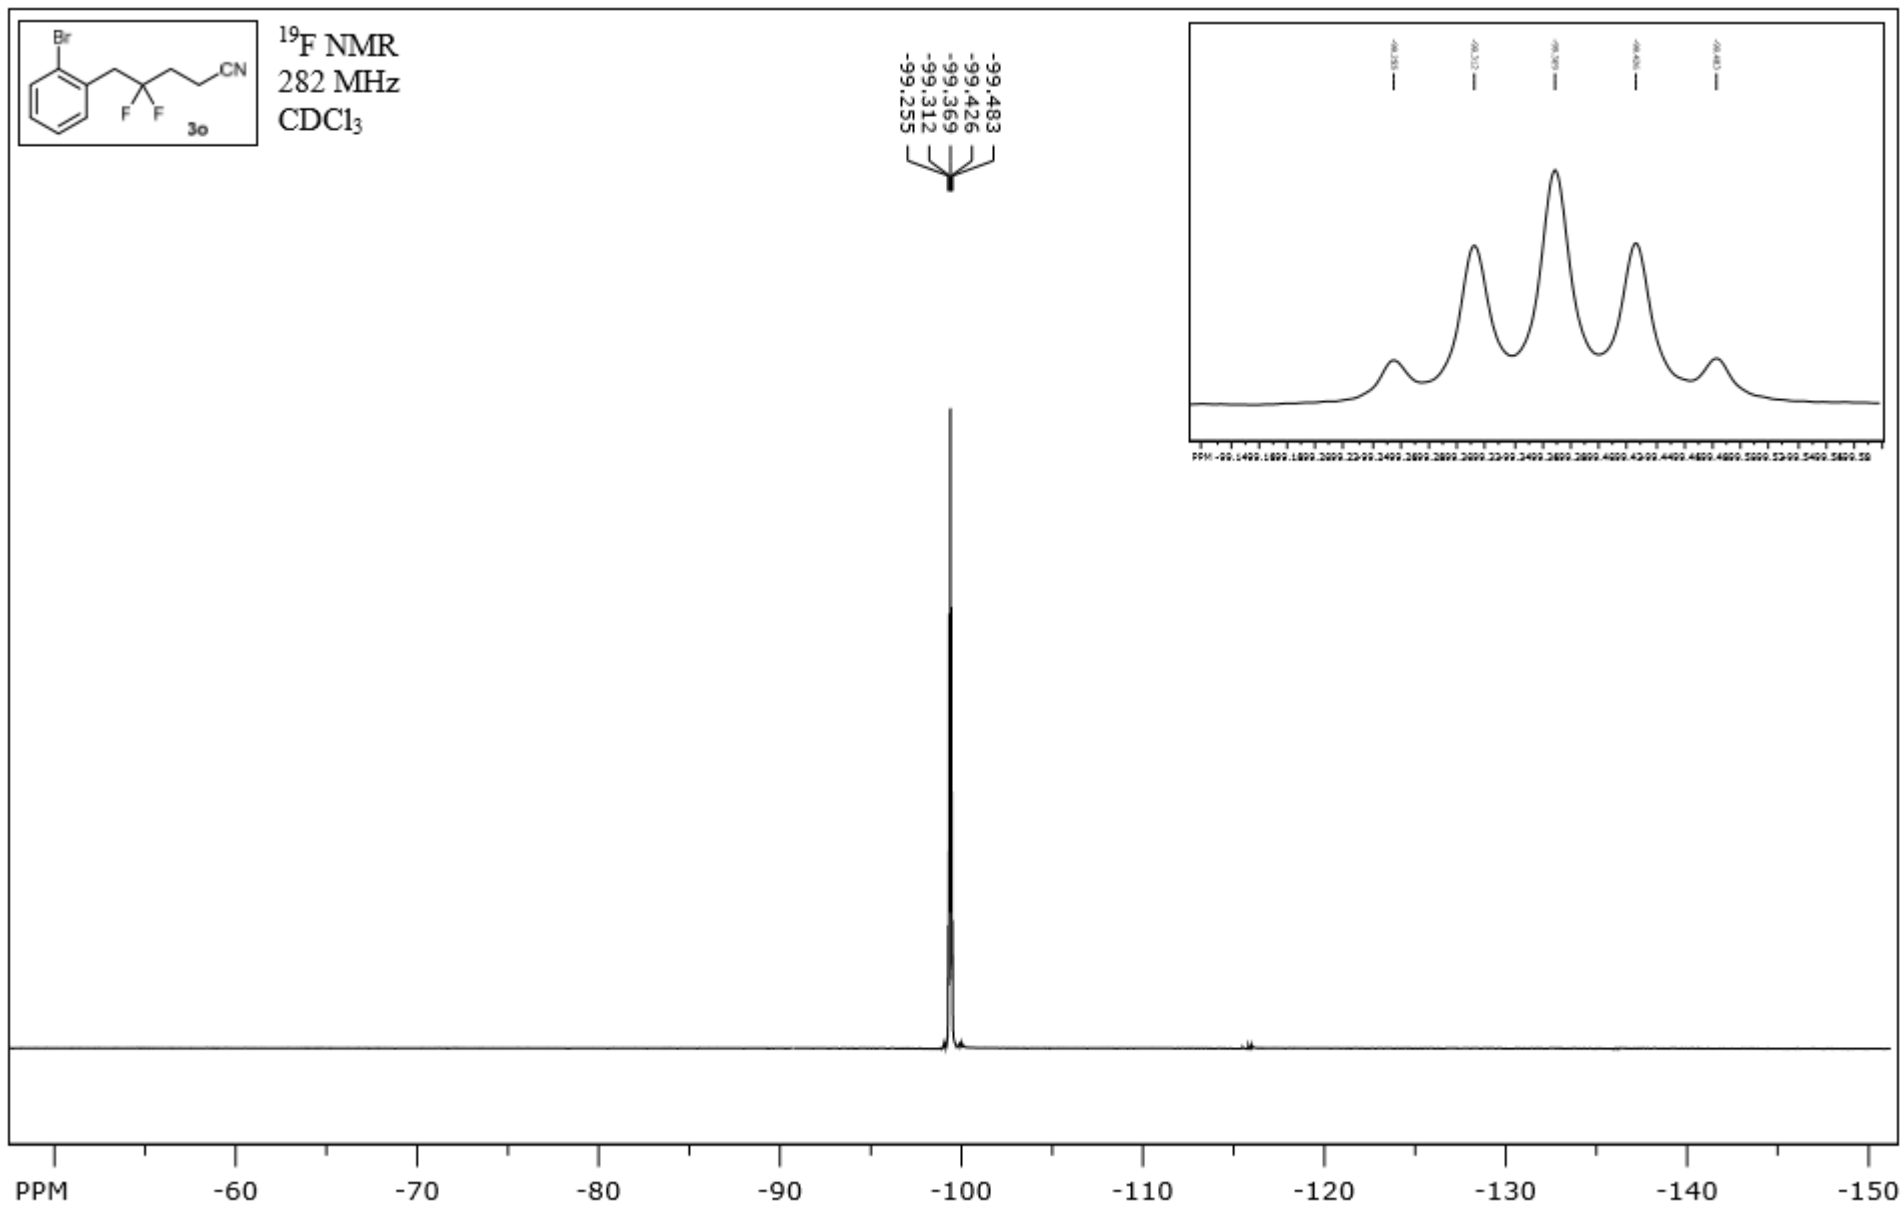

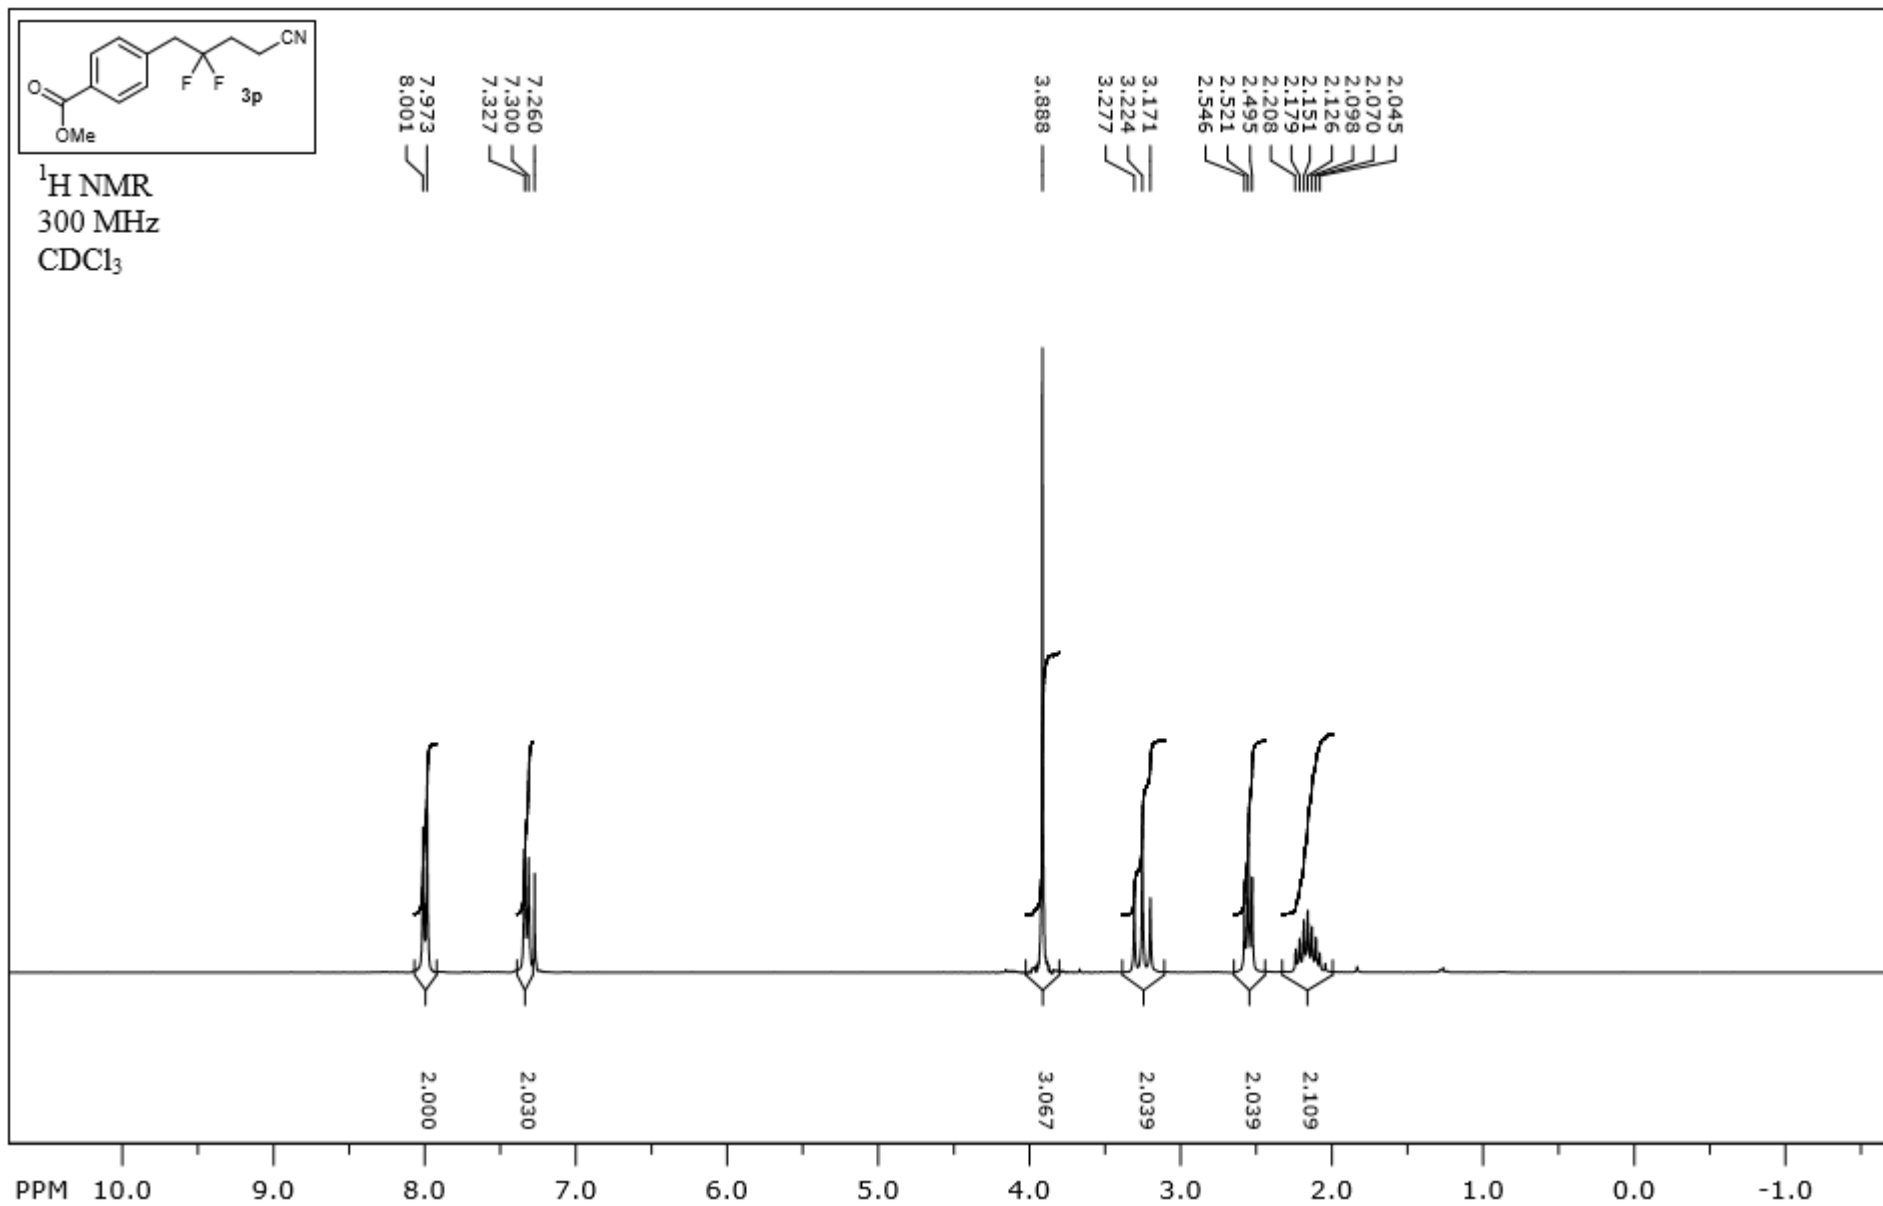

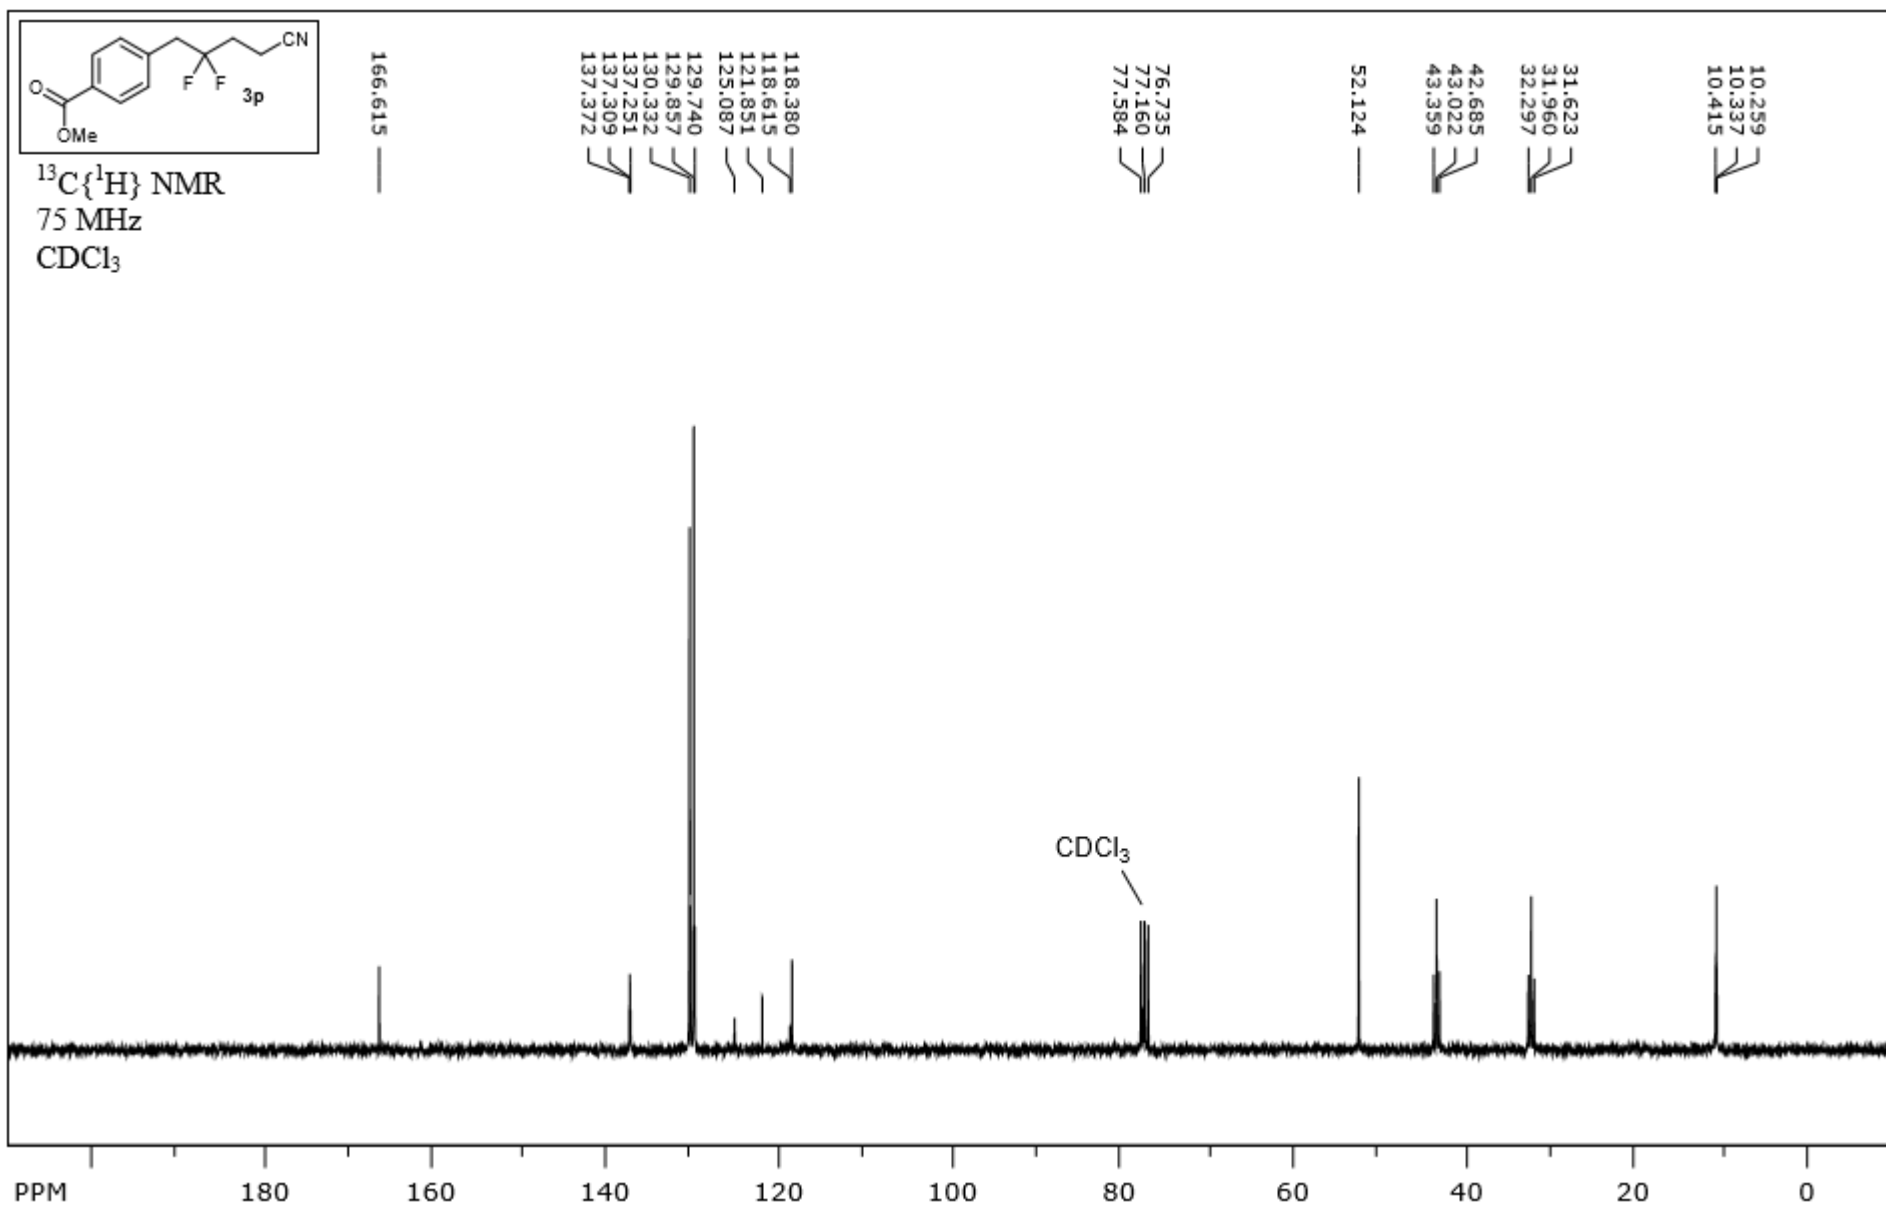



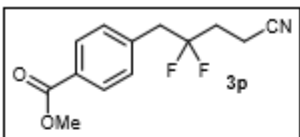

$^{19}\text{F}$  NMR  
282 MHz  
 $\text{CDCl}_3$

-100.199  
-100.142  
-100.085  
-100.027  
-99.970

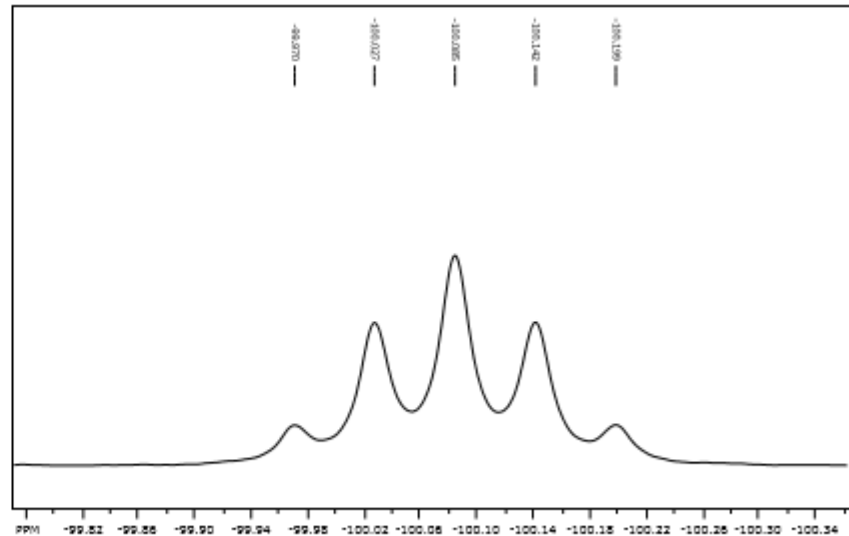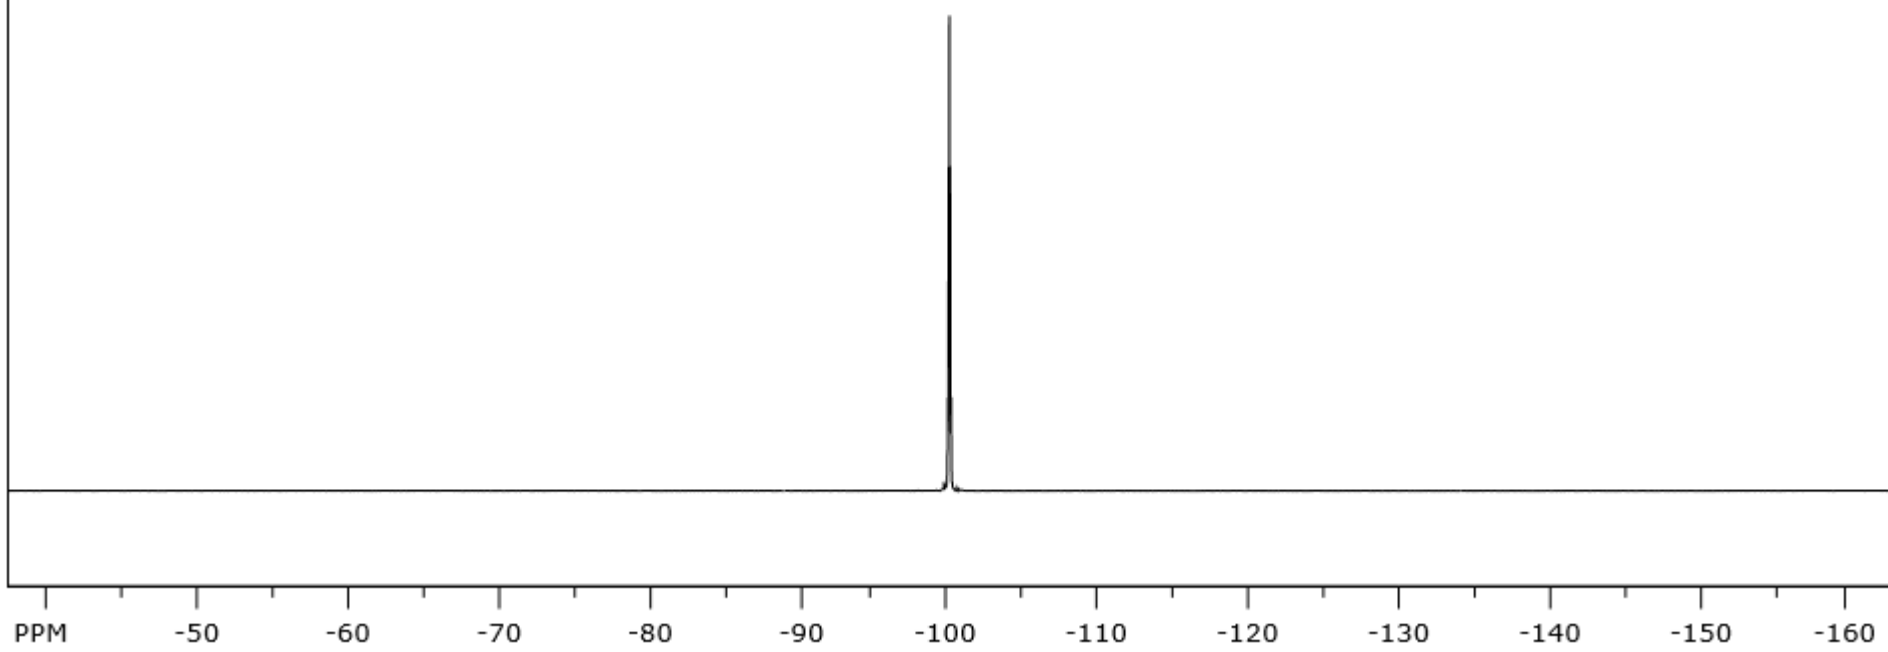

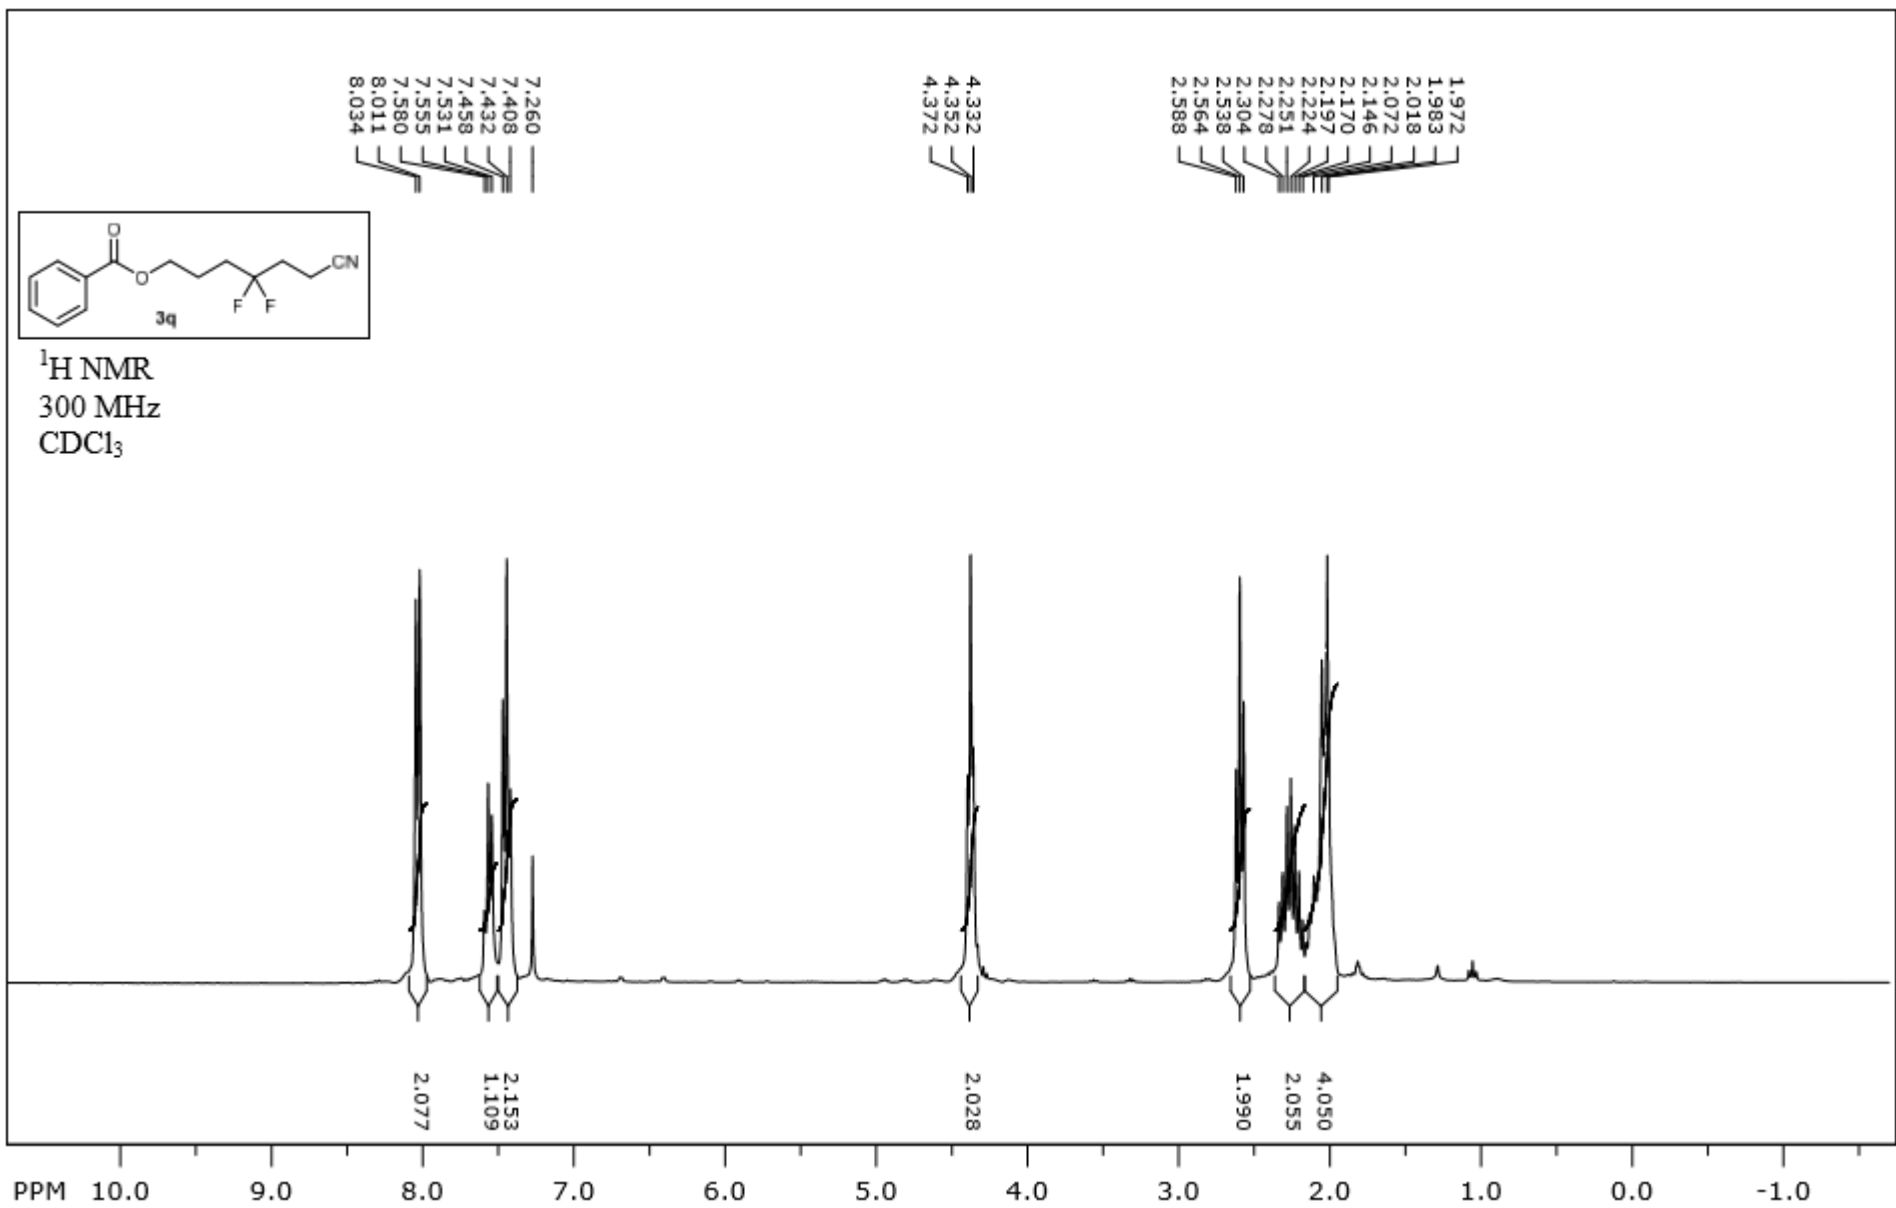

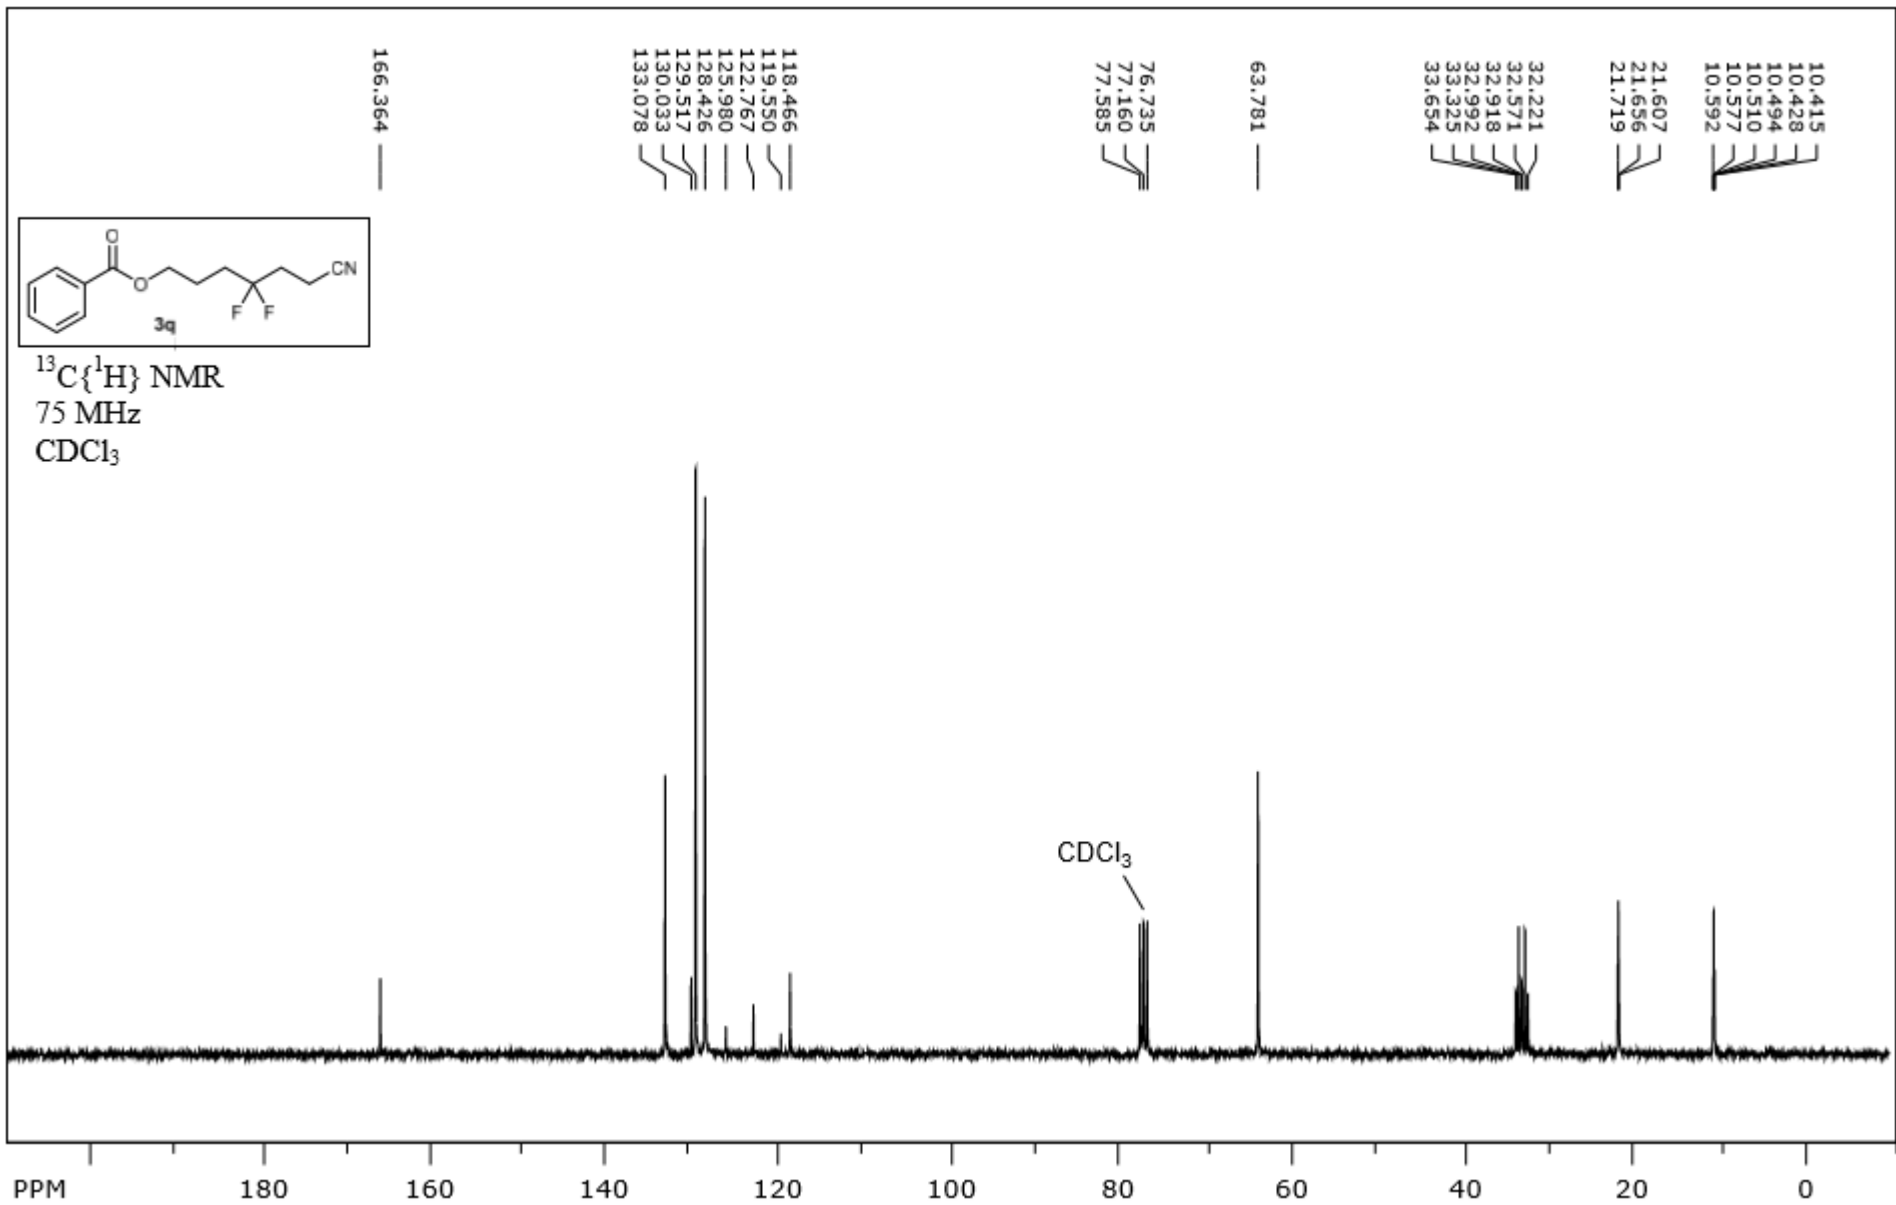

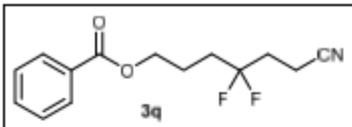

<sup>19</sup>F NMR  
282 MHz  
CDCl<sub>3</sub>

-102.506  
-102.449  
-102.392  
-102.336  
-102.280

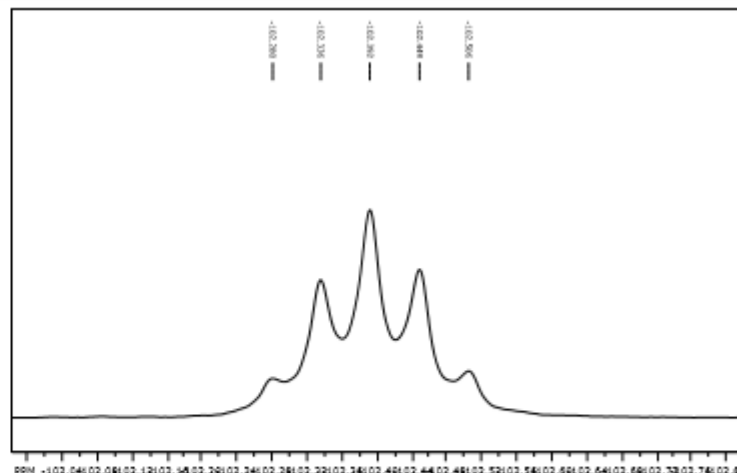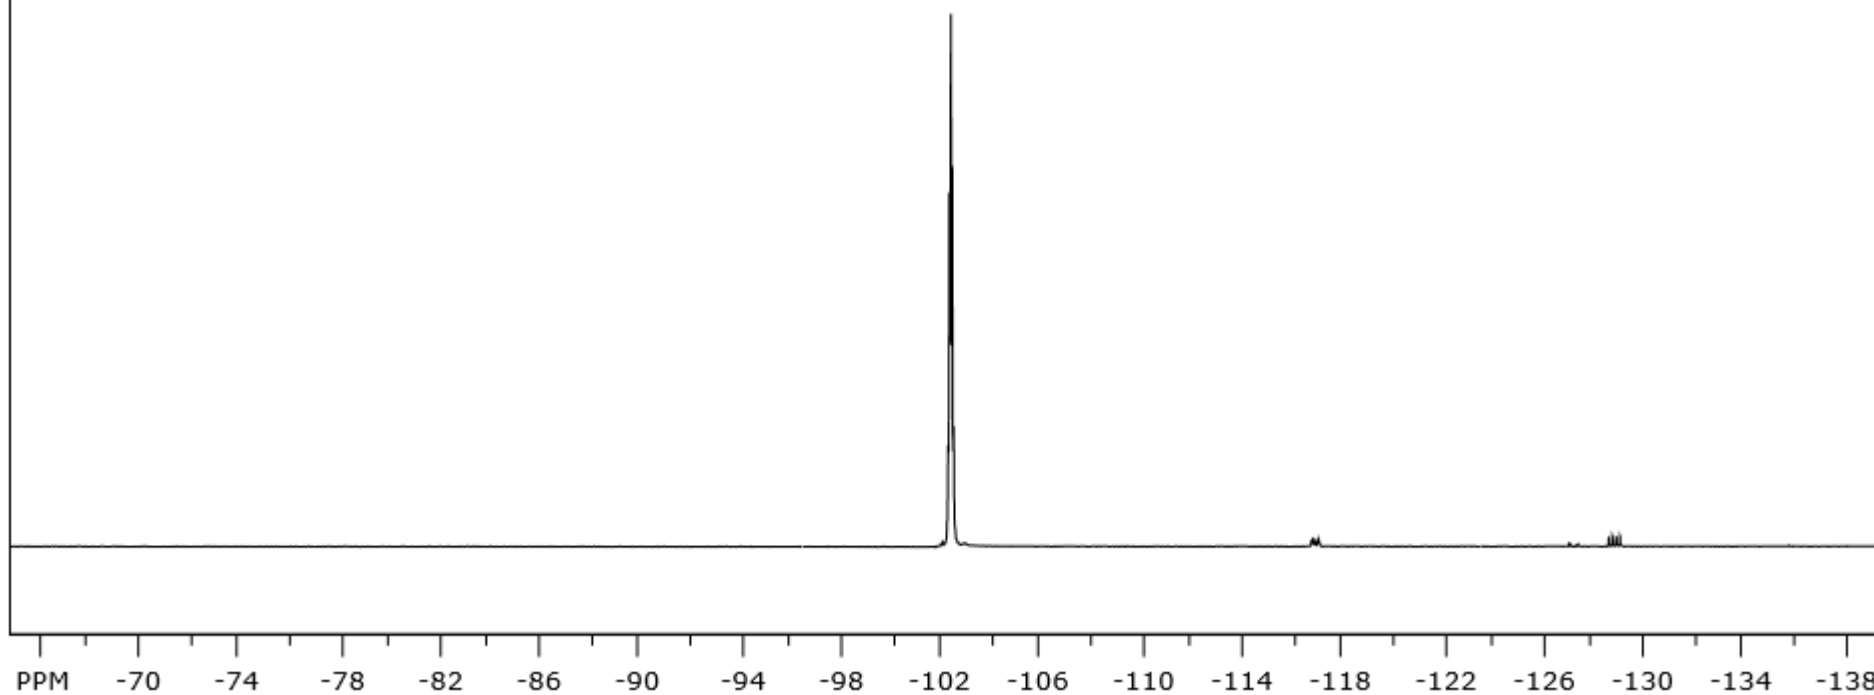

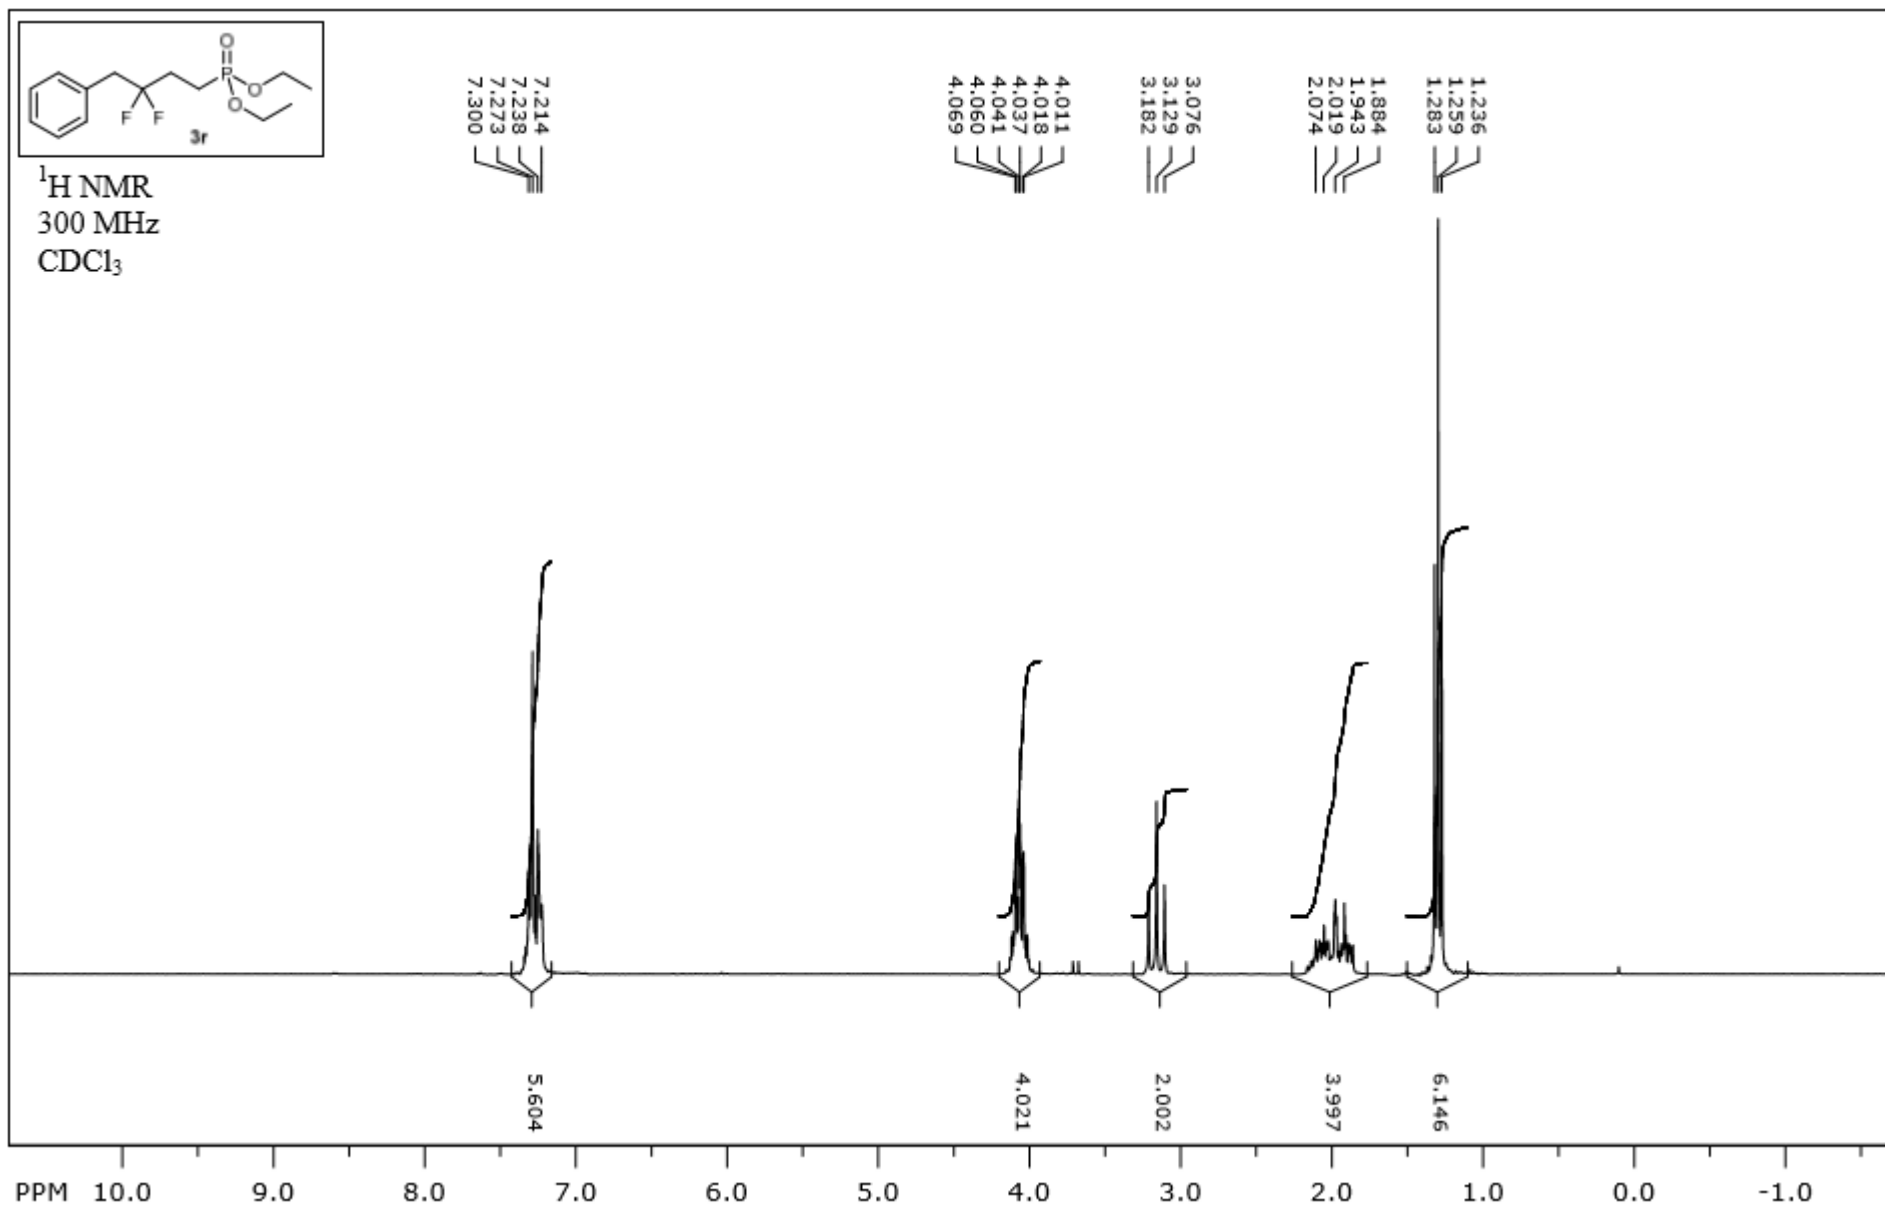

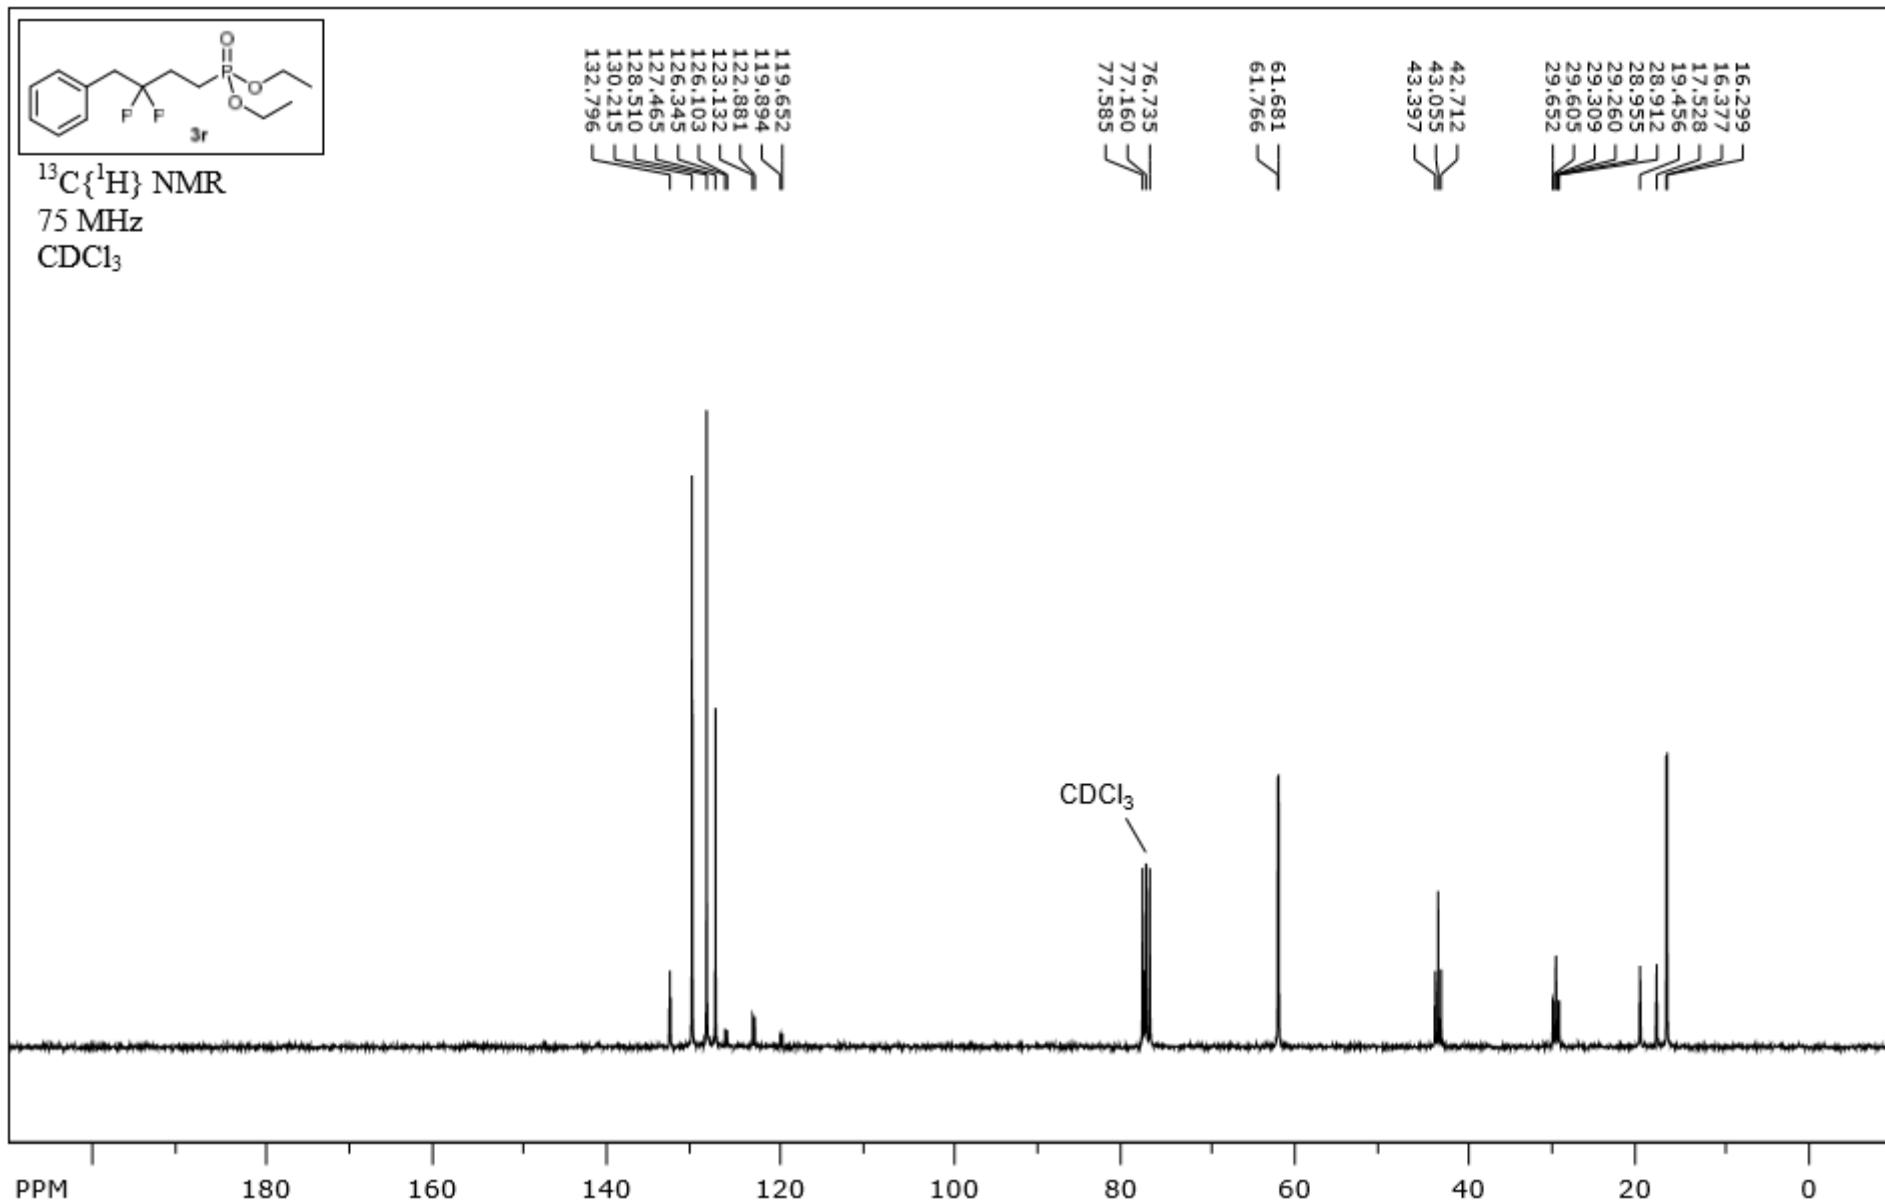

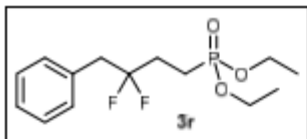

$^{19}\text{F}$  NMR  
282 MHz  
 $\text{CDCl}_3$

-99.817  
-99.760  
-99.704  
-99.648  
-99.592

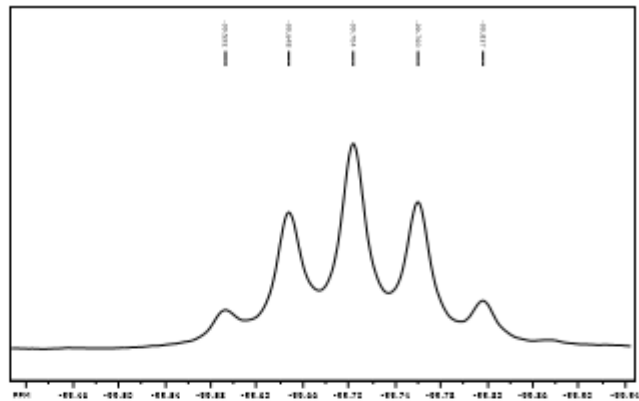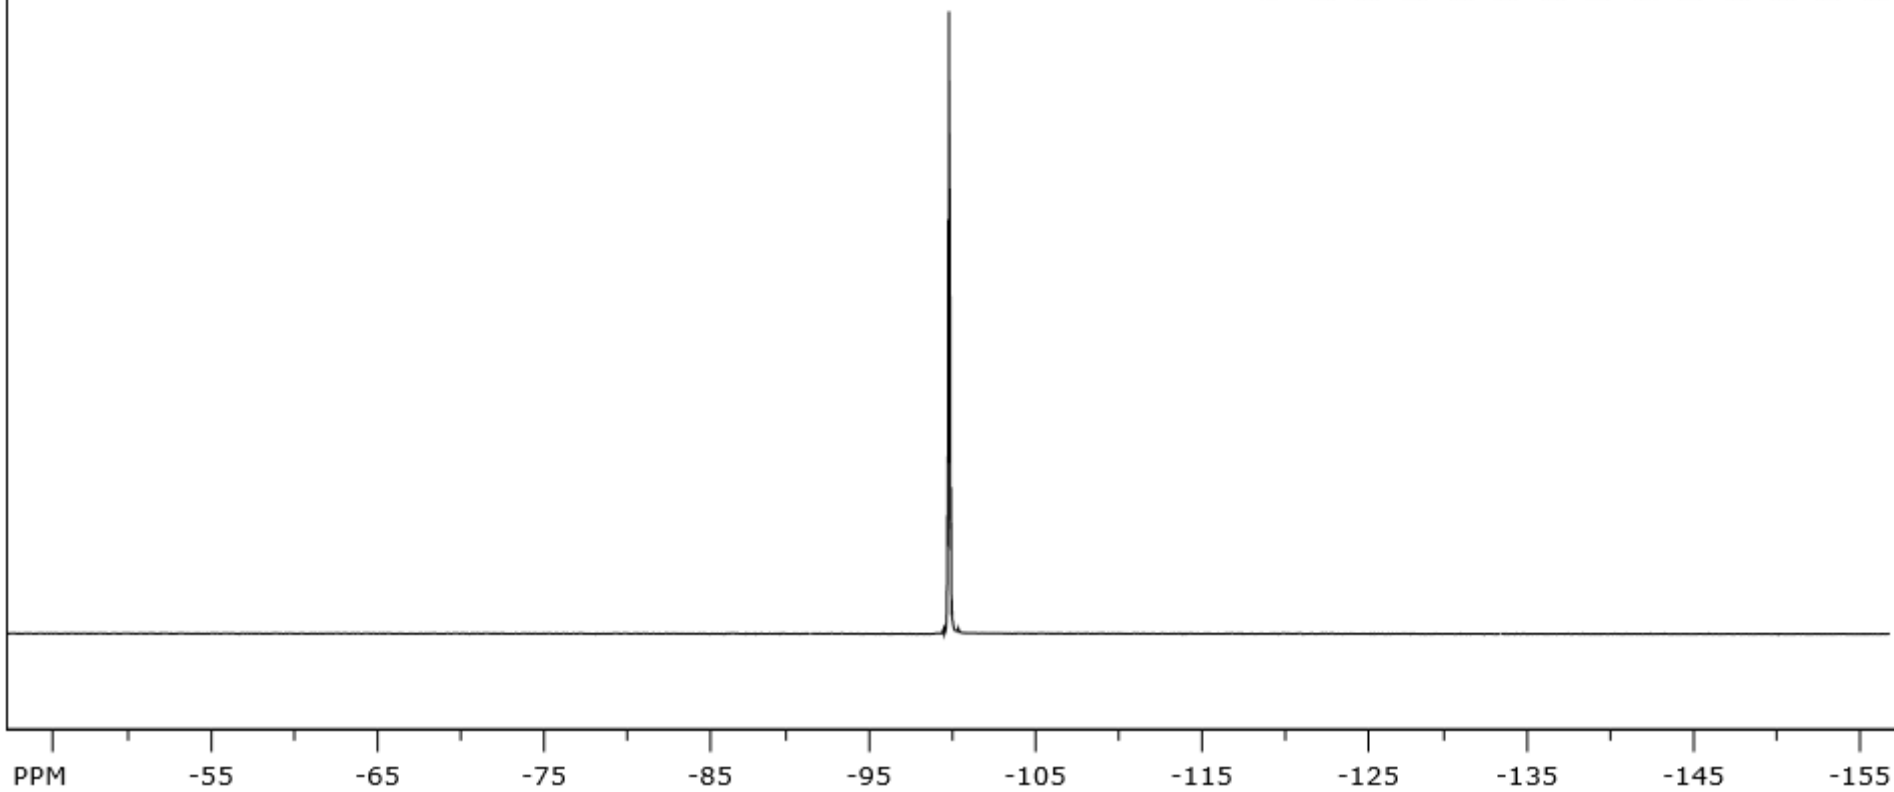

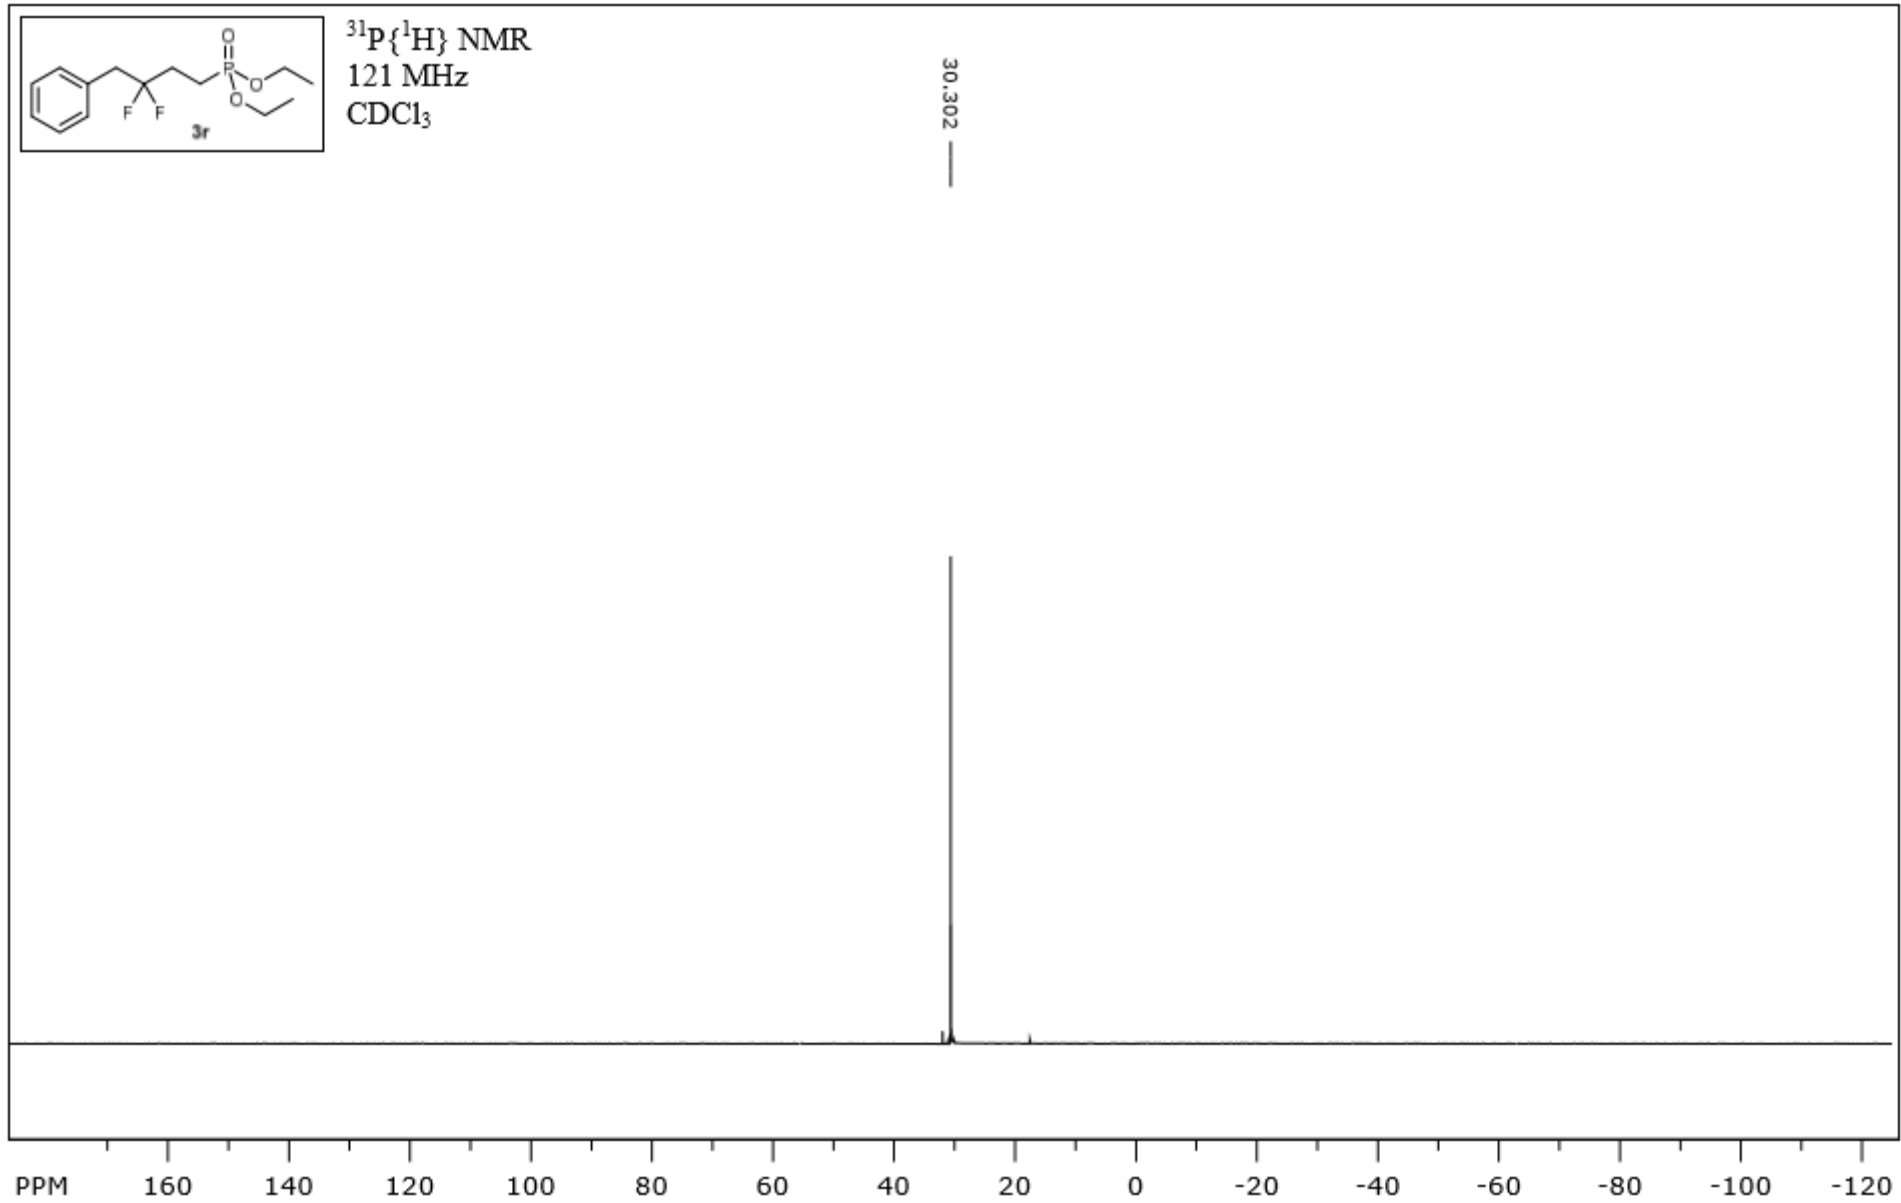



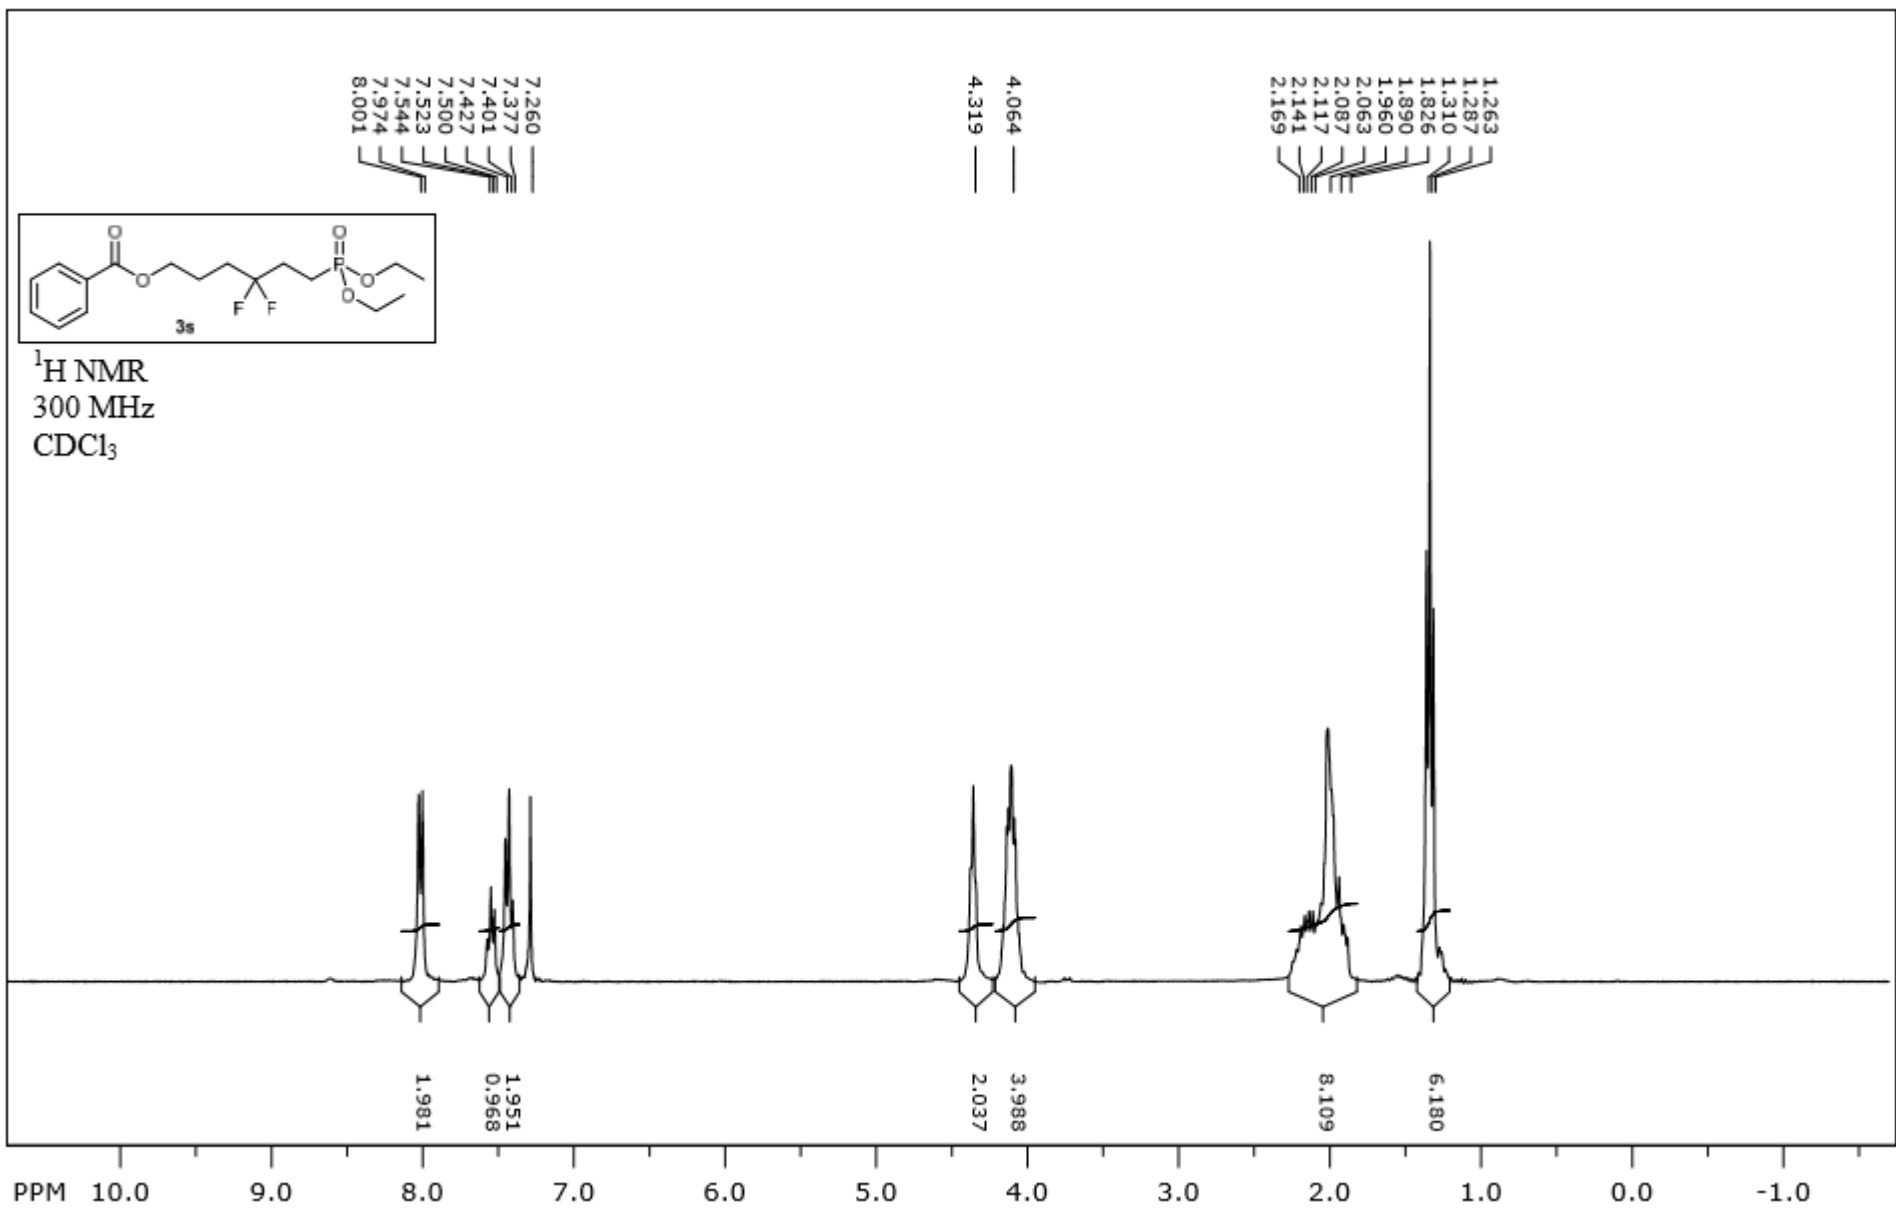

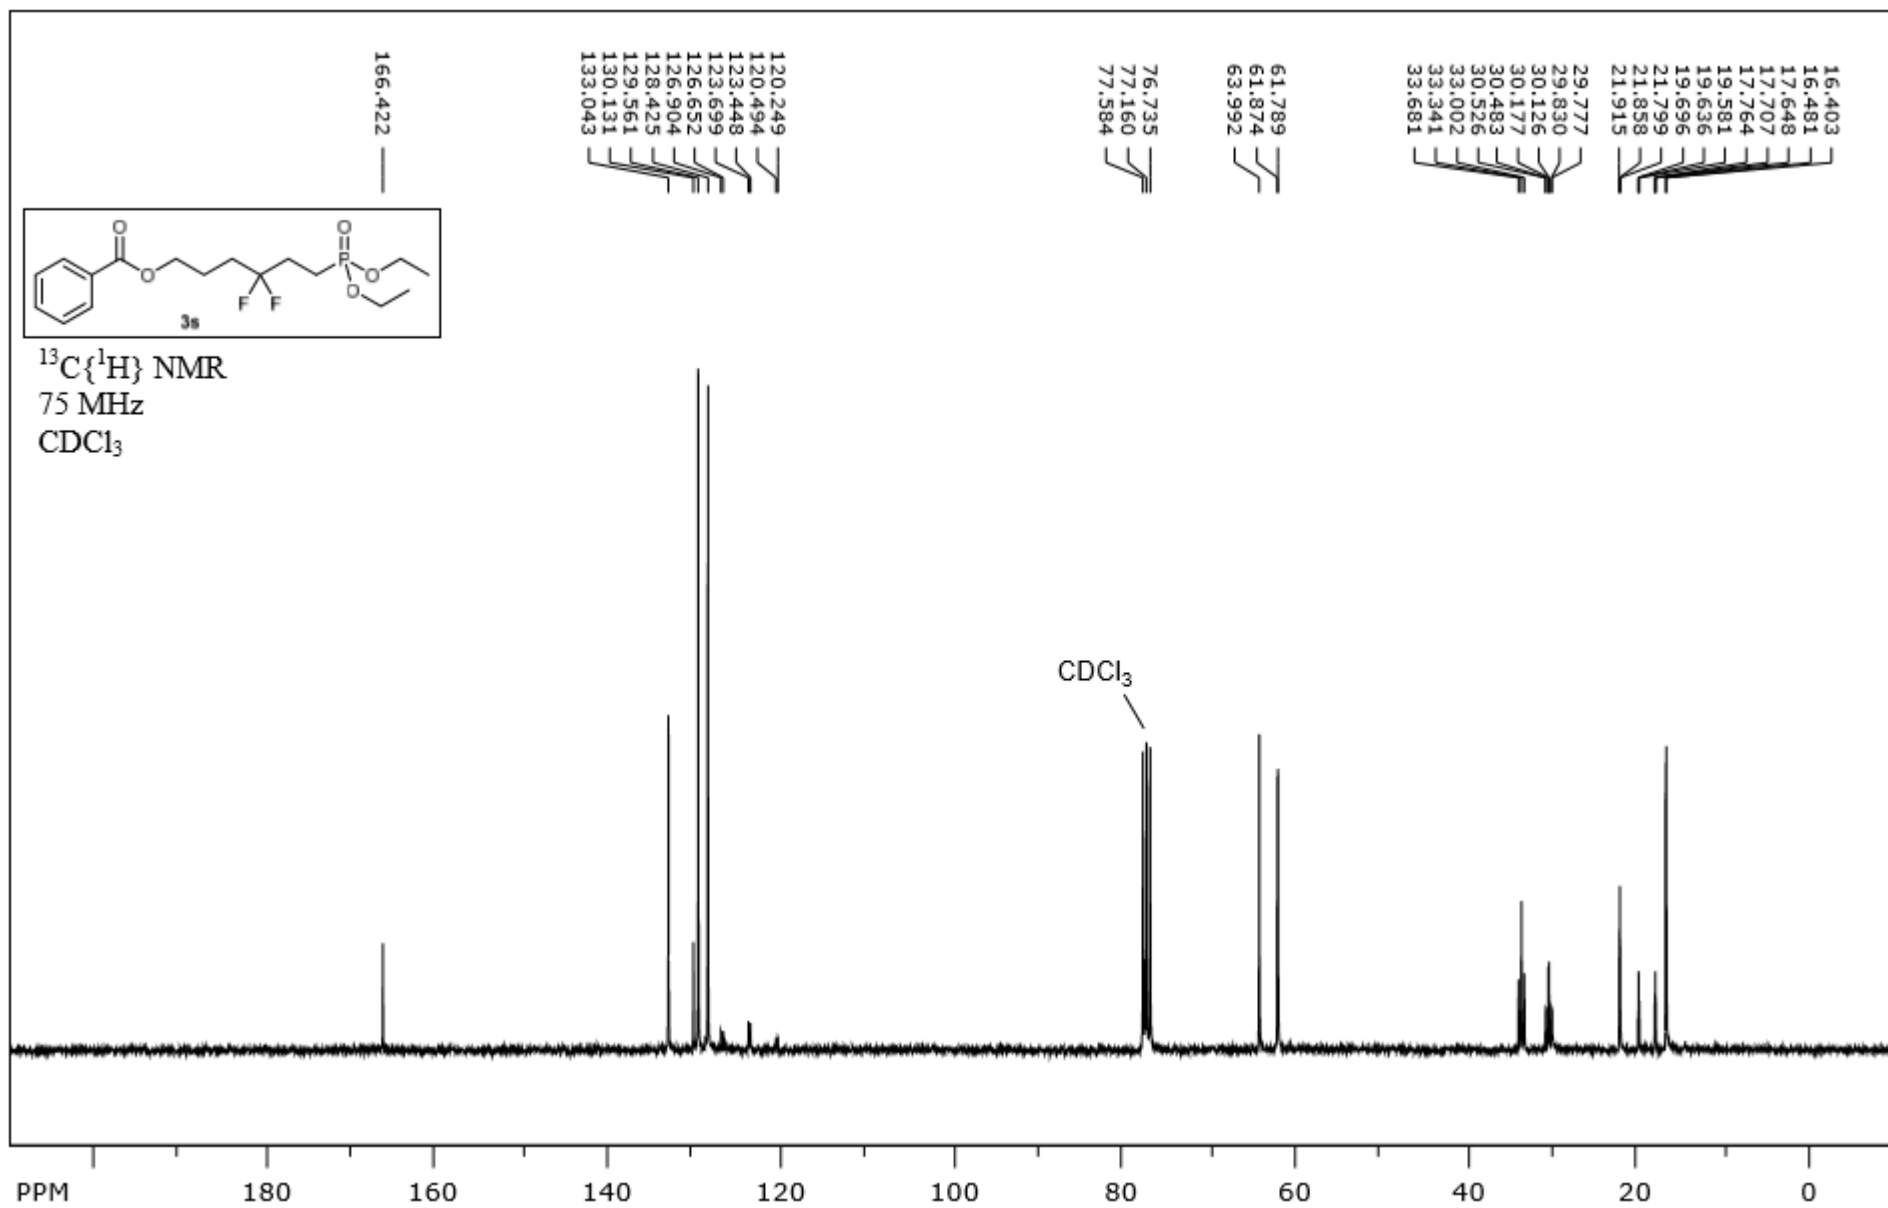

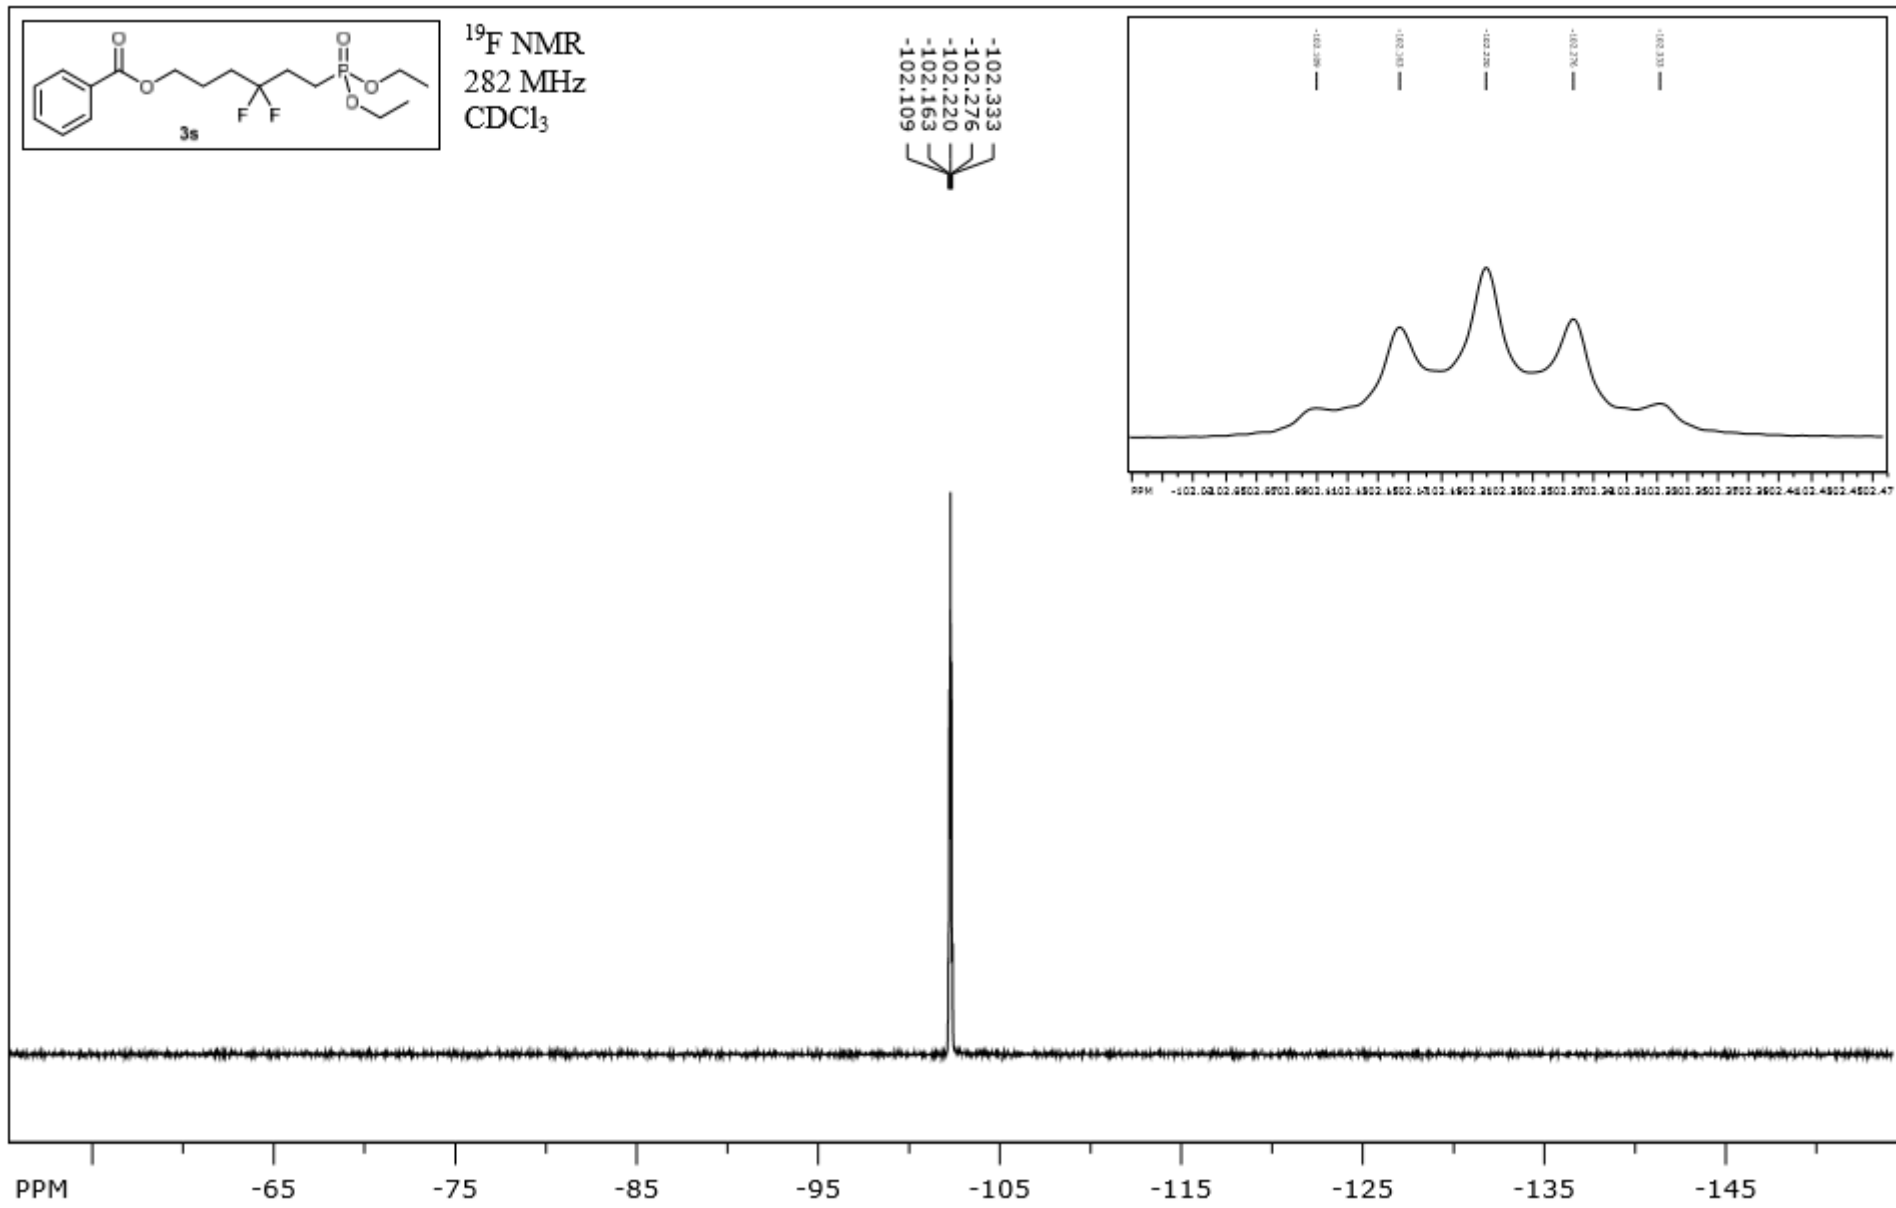

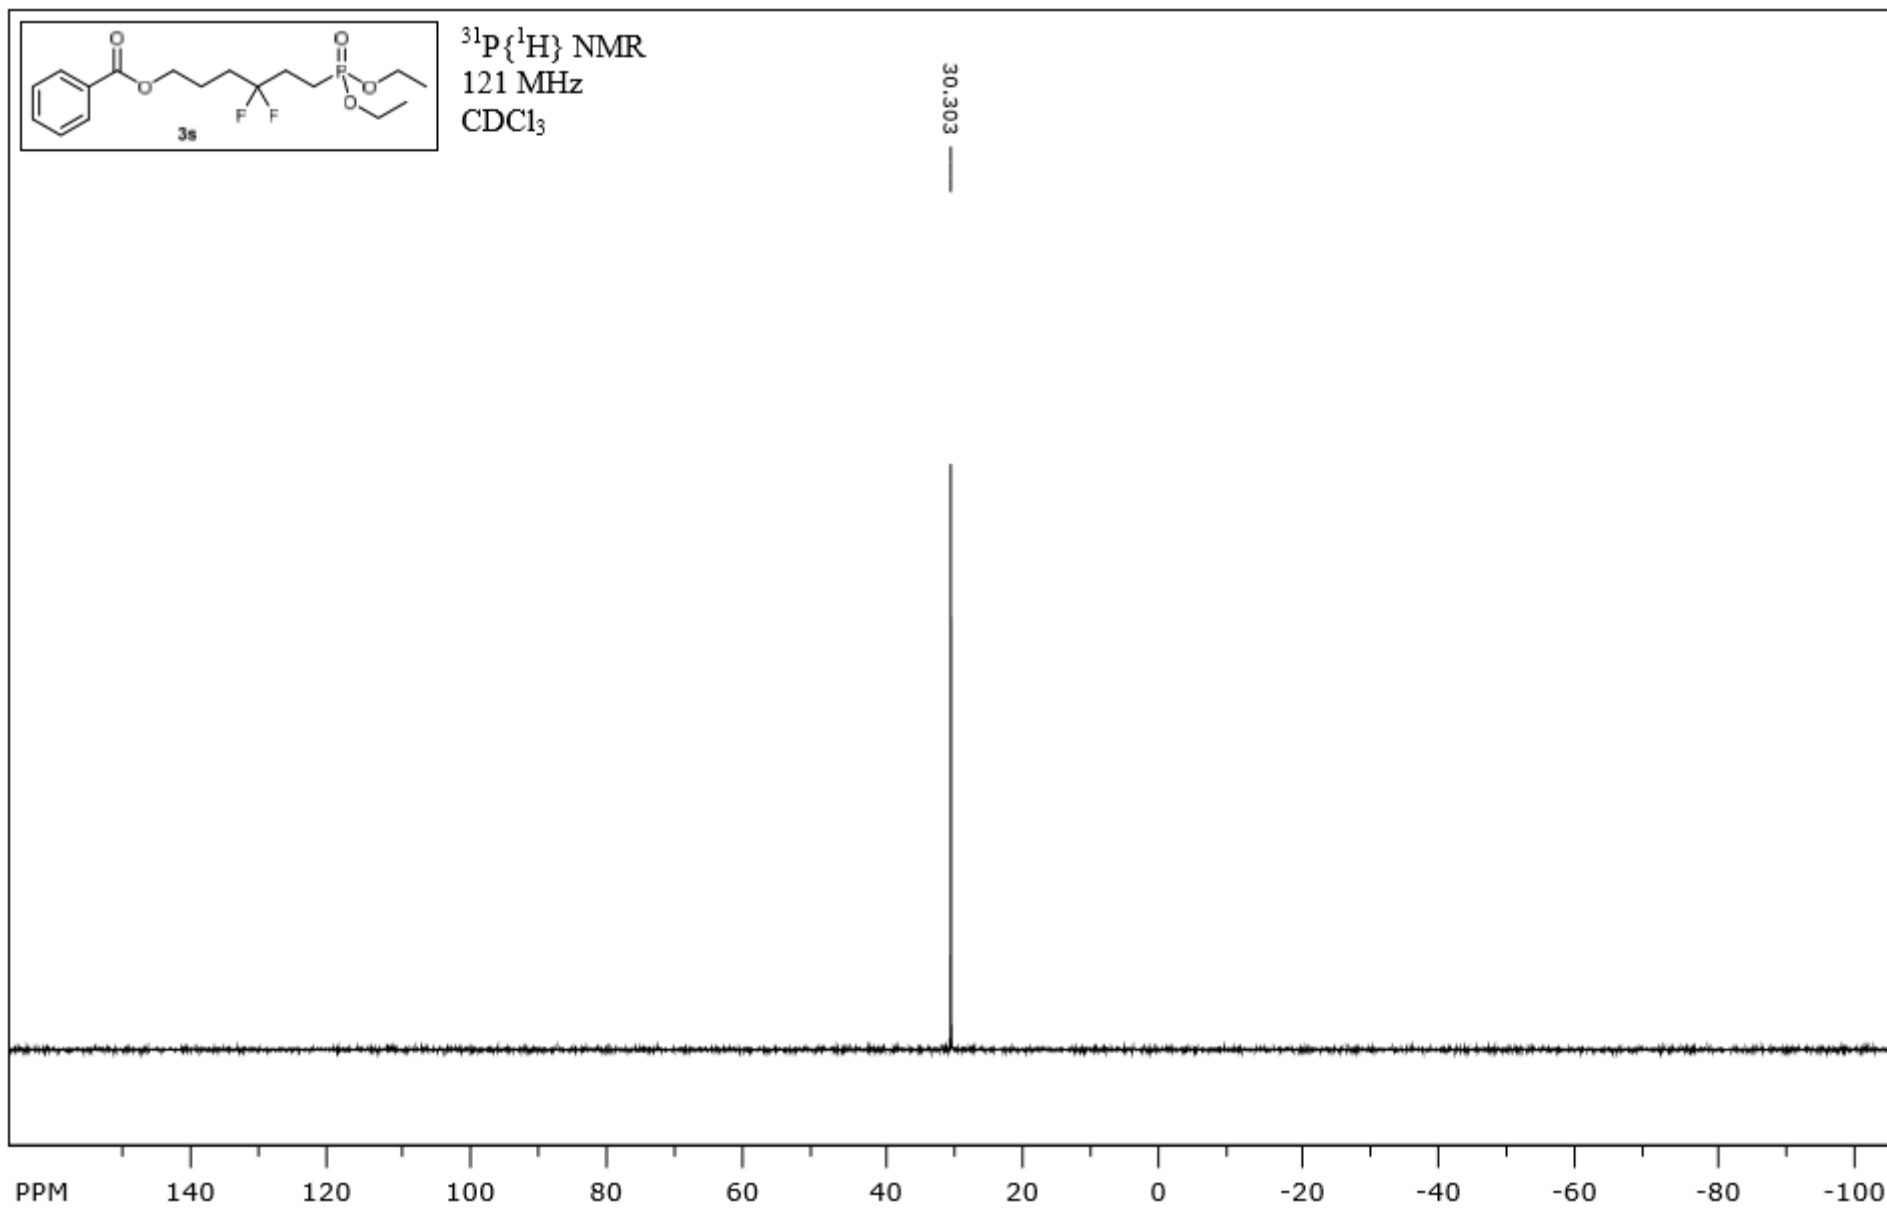

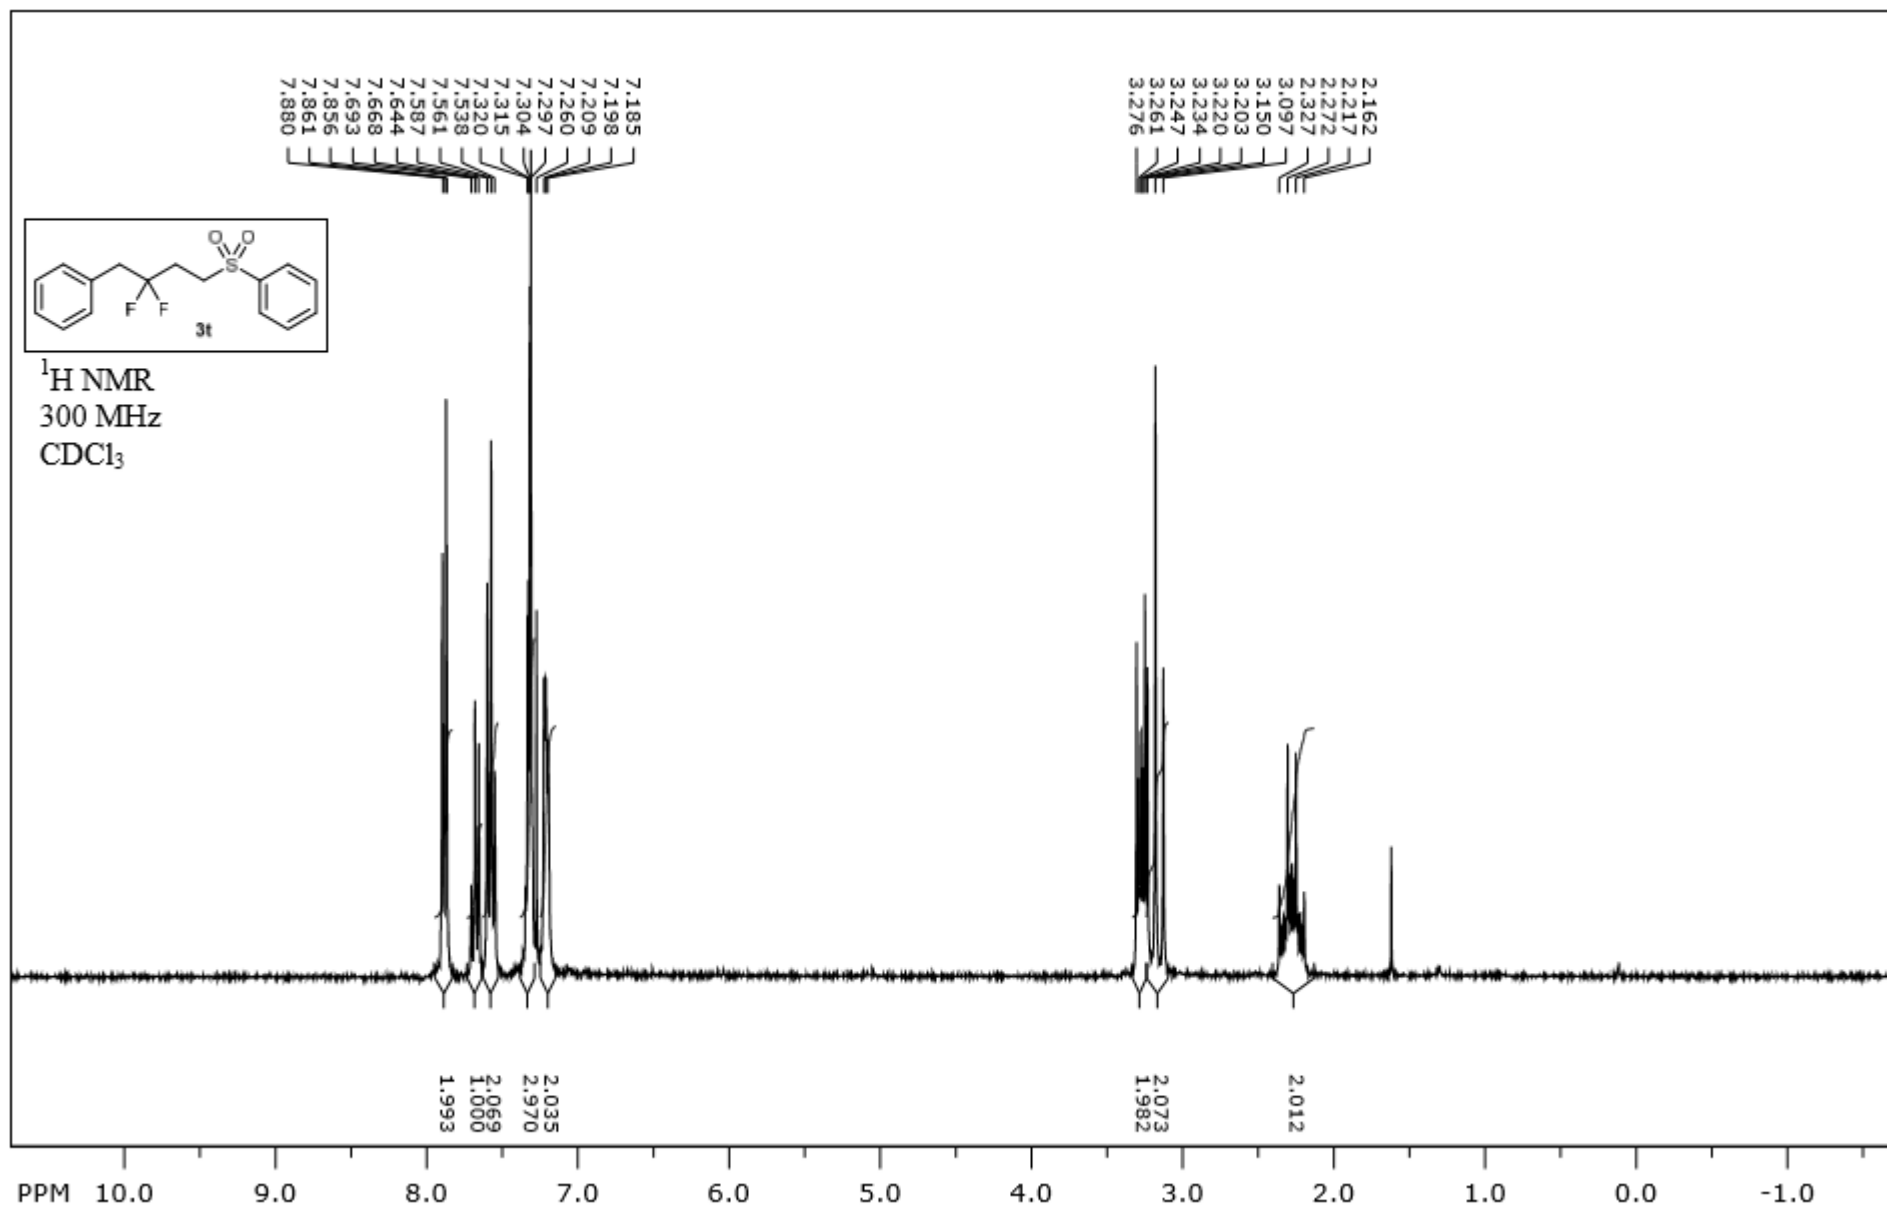

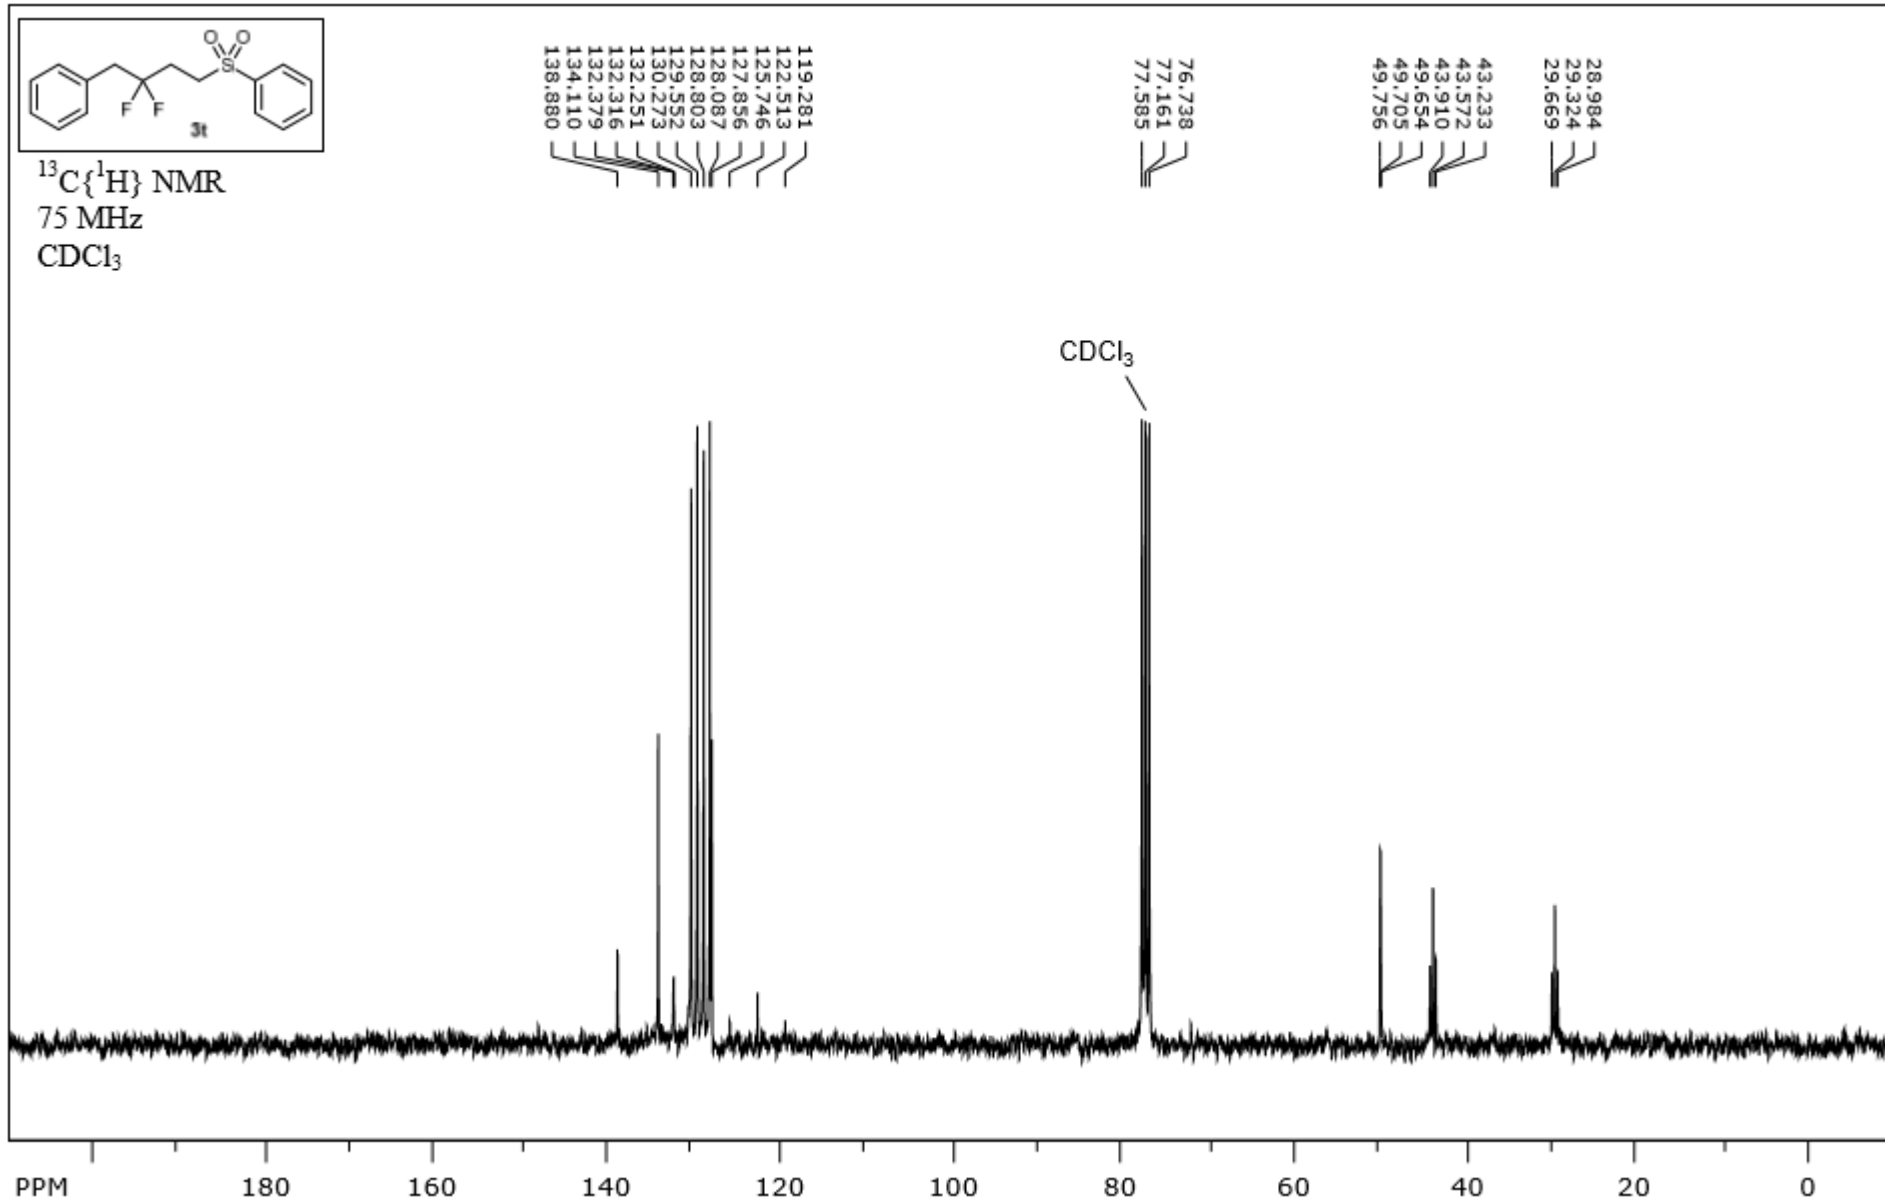

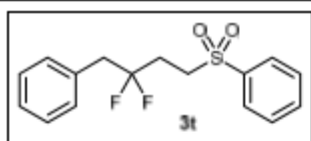

<sup>19</sup>F NMR  
282 MHz  
CDCl<sub>3</sub>

-98.429  
-98.372  
-98.315  
-98.257  
-98.200

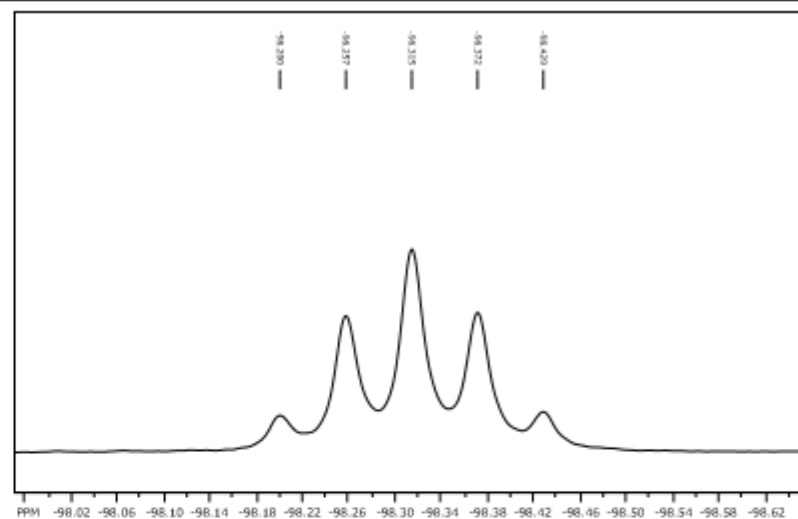

PPM -50 -60 -70 -80 -90 -100 -110 -120 -130 -140 -150

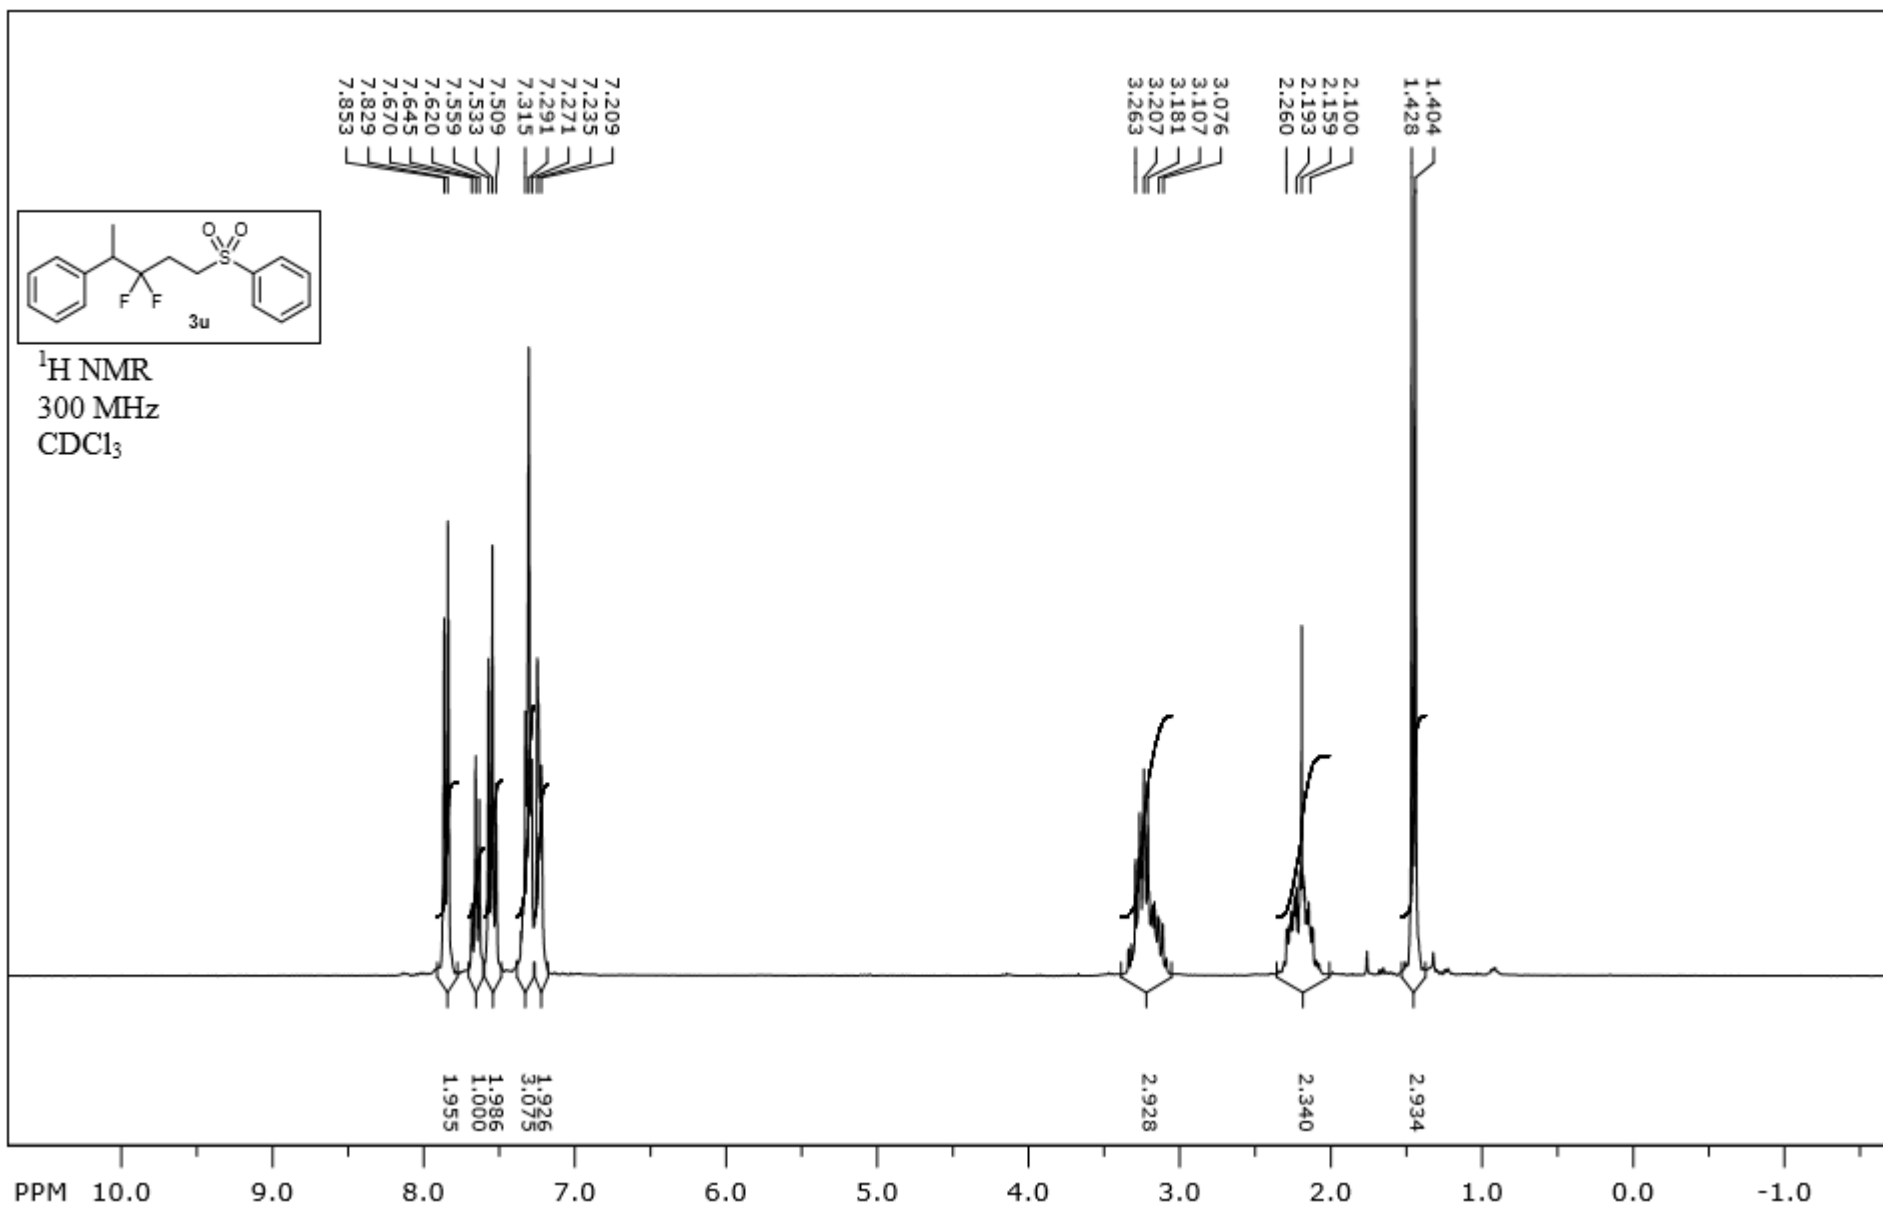



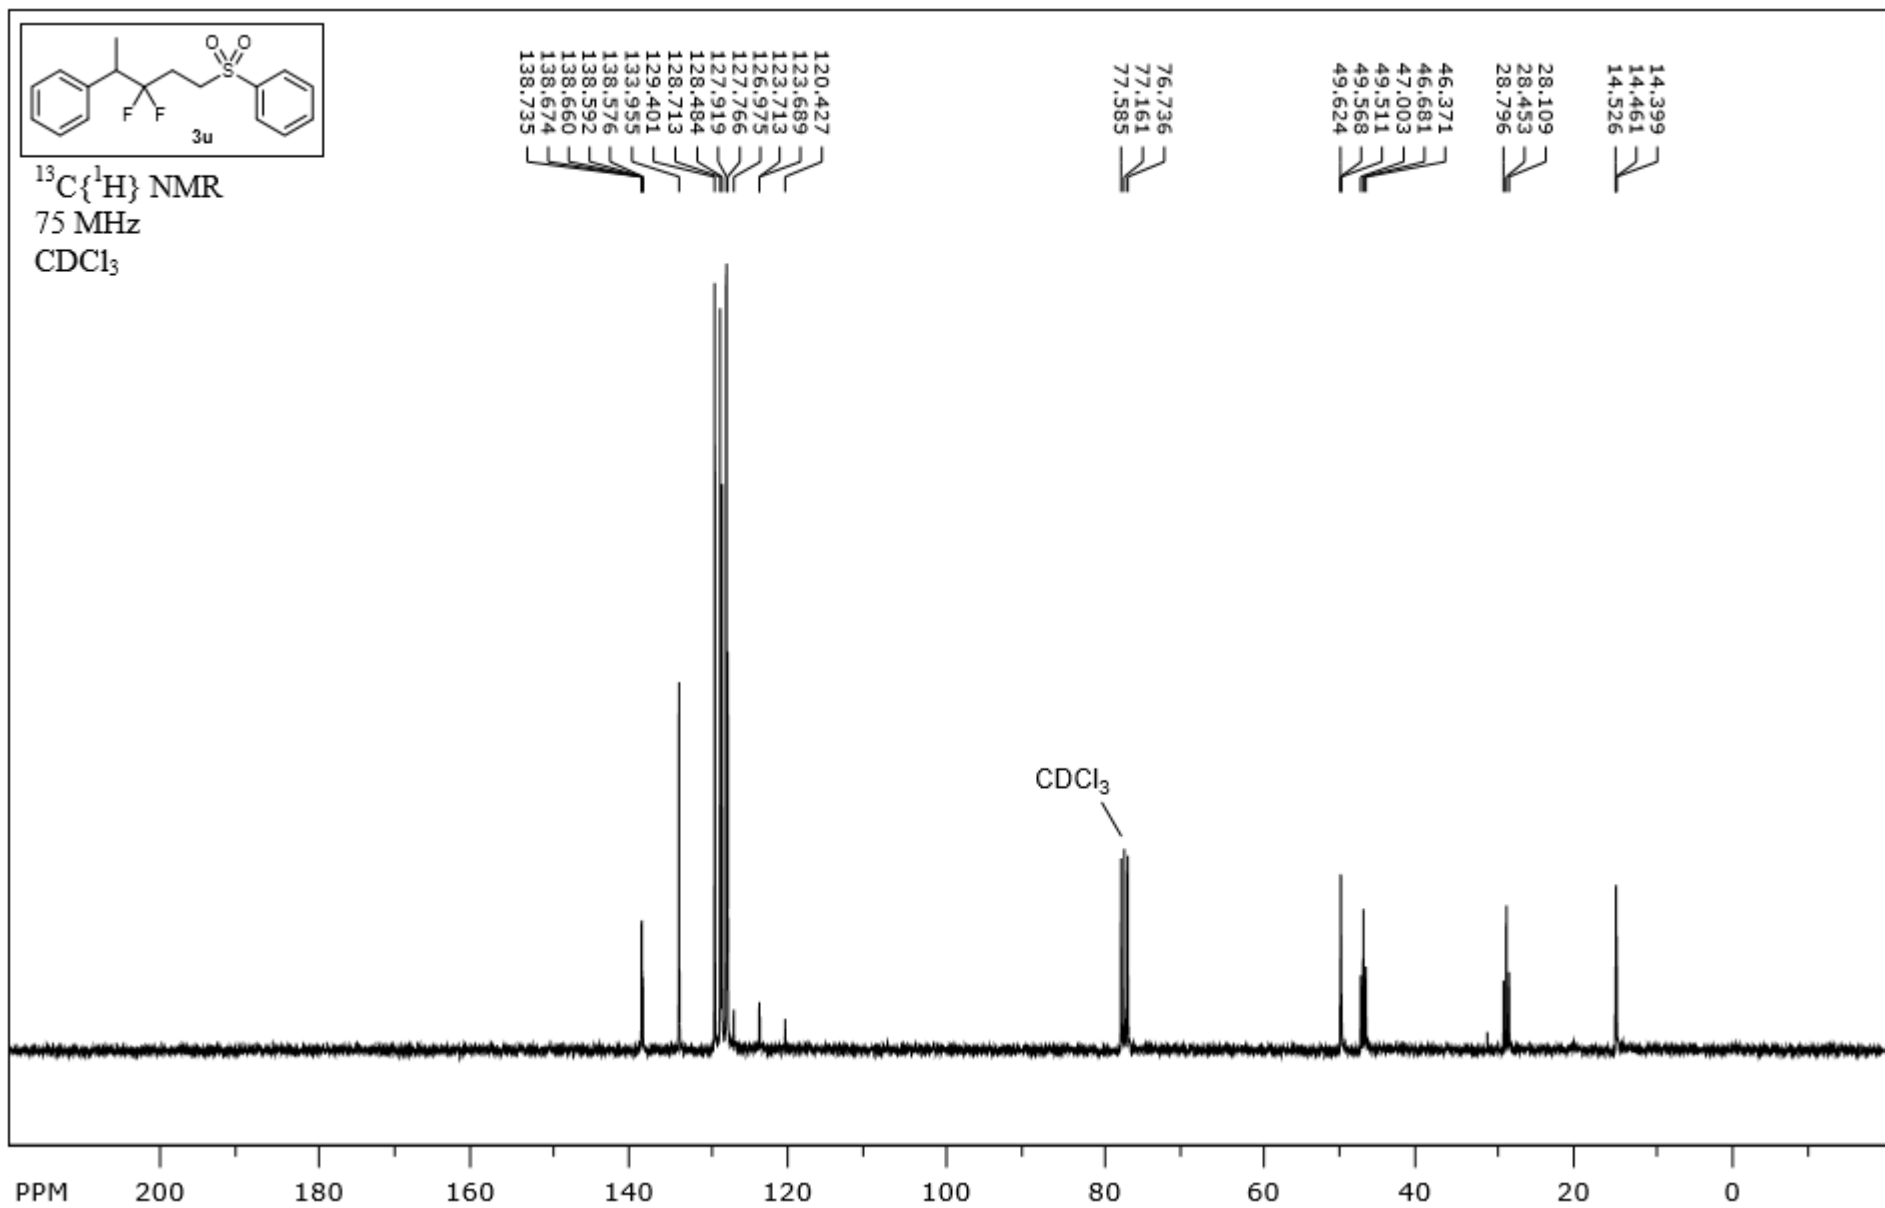

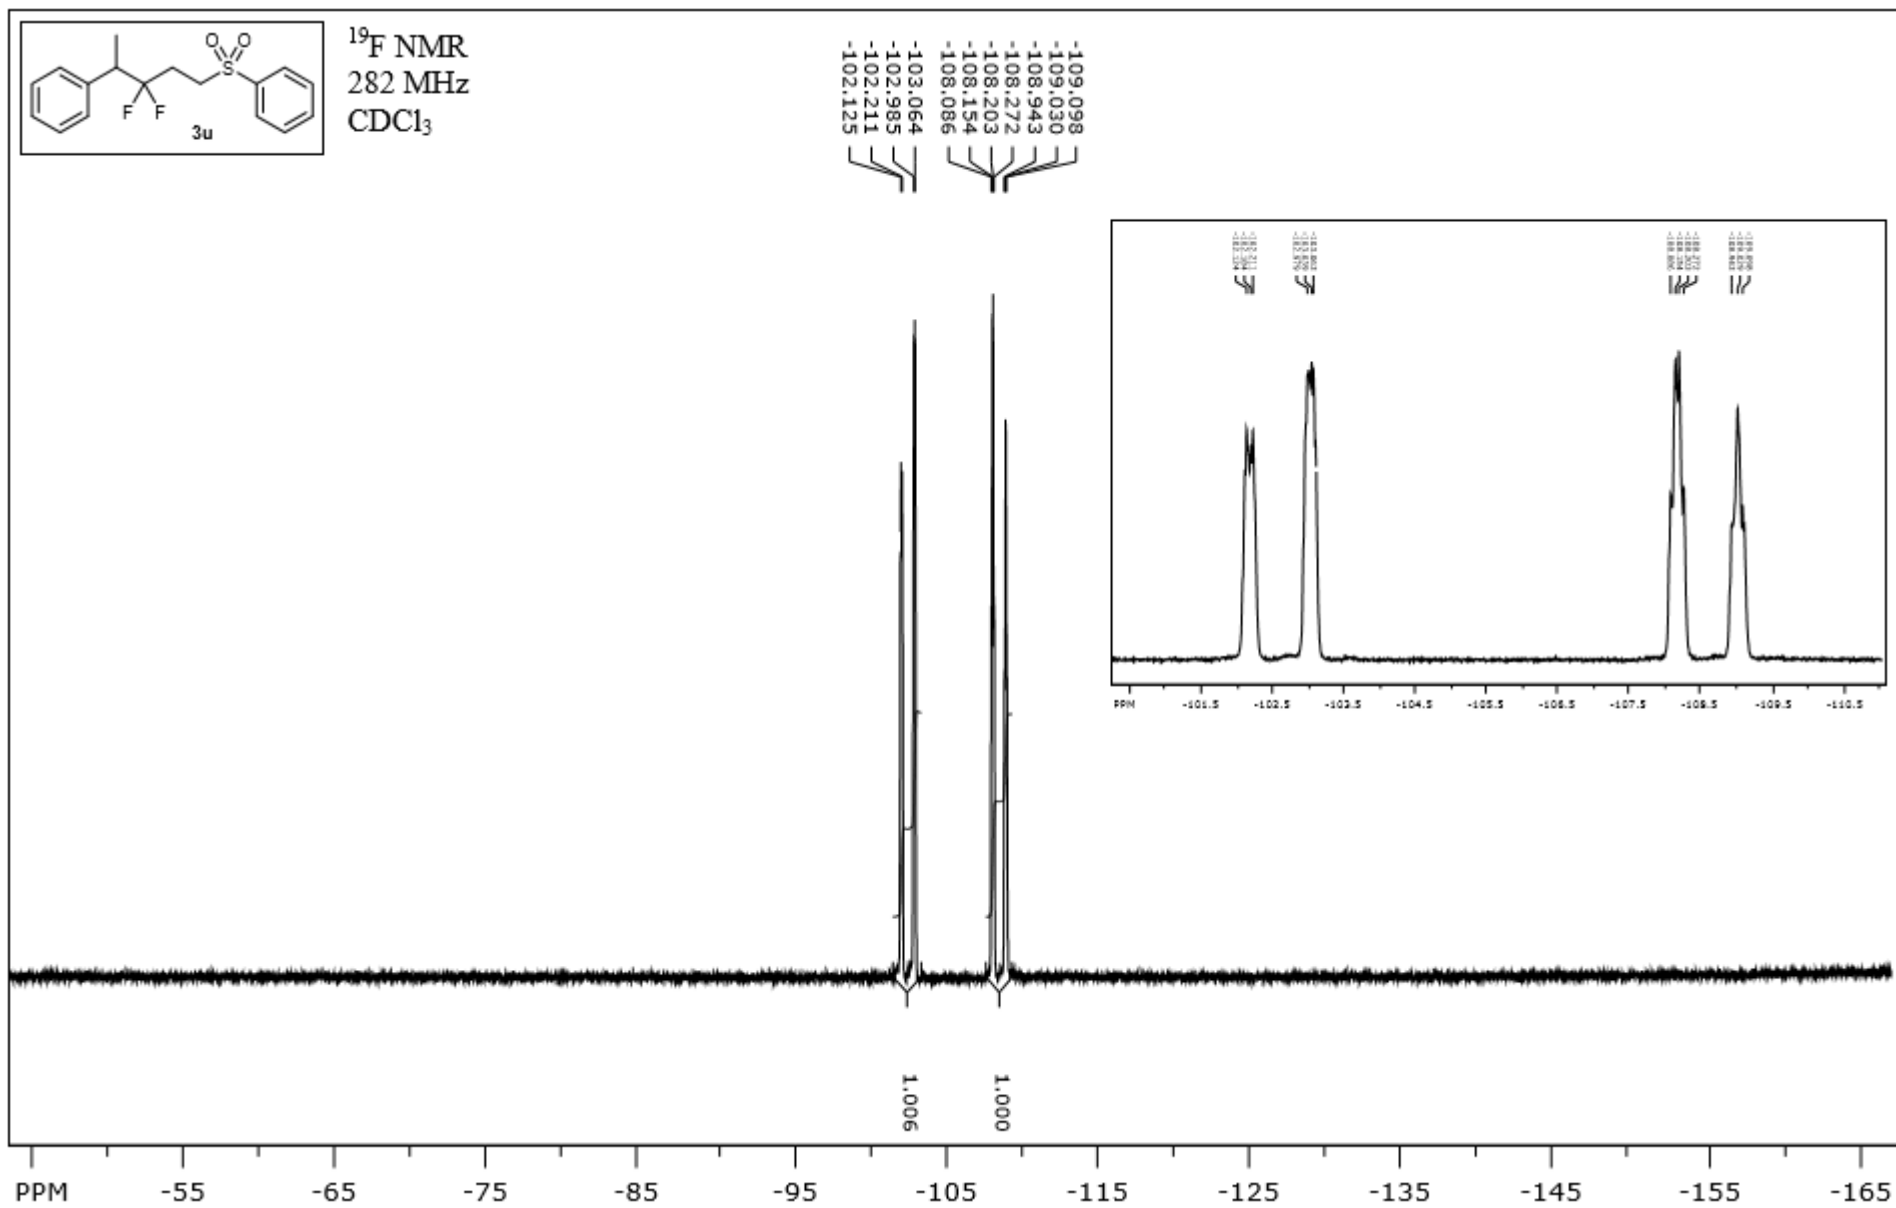

Supplement: Beilstein_J_Org_Chem-14-1637-s001.pdf [file Beilstein_J_Org_Chem-14-1637-s001.pdf]
